# Supplementary material
Source: PubMed Central journal article supplement (PMC3248350)
Supplement: NIHMS343995-supplement-ESI.pdf [file NIHMS343995-supplement-ESI.pdf]

**Enantioselective Carbon–Sulfur Bond Formation:  
γ Additions of Aryl Thiols to Allenates Catalyzed by a Chiral Phosphine**

Yuji Fujiwara, Jianwei Sun, and Gregory C. Fu\*

*Department of Chemistry, Massachusetts Institute of Technology,  
Cambridge, Massachusetts 02139*

**SUPPORTING INFORMATION**

**Table of Contents**

|                                                                             |             |
|-----------------------------------------------------------------------------|-------------|
| <b>I. General Information</b>                                               | <b>S–1</b>  |
| <b>II. Preparation of Allenes</b>                                           | <b>S–1</b>  |
| <b>III. Phosphine-Catalyzed Enantioselective γ Additions of Aryl Thiols</b> | <b>S–4</b>  |
| <b>IV. Preparation of Catalyst 1</b>                                        | <b>S–15</b> |
| <b>V. Determination of Absolute Configuration</b>                           | <b>S–17</b> |
| <b>VI. NMR Spectra</b>                                                      | <b>S–42</b> |

**I. General Information**

The following reagents were purchased and used as received: toluene (anhydrous; Sigma-Aldrich), pivalic acid (98%; TCI), sodium hydride (dry, 95%; Sigma-Aldrich), and phenylphosphine (Alfa-Aesar).

HPLC analyses were carried out on an Agilent 1100 Series system, and supercritical fluid chromatography (SFC) analyses were carried out on a Berger SFC MiniGram system. Daicel CHIRALCEL® columns or Daicel CHIRALPAK® columns (internal diameter 4.6 mm, column length 250 mm, particle size 5 μm) were used for both HPLC and SFC analysis.

**II. Preparation of Allenes**

**General Procedure.** (*tert*-Butoxycarbonylmethylene)triphenylphosphorane (11.3 g, 30.0 mmol) and a stir bar were added to a 250-mL flask, which was then evacuated and back-filled with nitrogen three times. CH<sub>2</sub>Cl<sub>2</sub> (90 mL) and Et<sub>3</sub>N (3.50 mL, 25 mmol) were added via syringe, and the resulting solution was stirred at r.t. in a water bath. The acid chloride (30.0 mmol) was then added dropwise via syringe over 2 min to the stirred solution, during which time the temperature was maintained at r.t. After 1 h of stirring at r.t., the reaction mixture was concentrated under reduced pressure to one-third of the original volume, and pentane (100 mL) and silica gel (5 g) were added. After stirring at r.t. for 1 h, the mixture was passed through a pad of silica gel and

washed with 4:1 hexane/Et<sub>2</sub>O (150 mL). The combined filtrate was concentrated under reduced pressure, and the residue was purified by column chromatography, which furnished the allenolate as a colorless oil.

The yields have not been optimized.

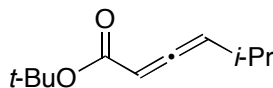

**(±)-tert-Butyl 5-methylhexa-2,3-dienoate.** Prepared from isovaleroyl chloride according to the General Procedure (purification by flash chromatography: 30:1 hexane/Et<sub>2</sub>O; 23% yield).

<sup>1</sup>H NMR (CDCl<sub>3</sub>, 400 MHz) δ 5.50 (dd, *J* = 6.0 Hz, *J* = 6.0 Hz, 1H), 5.44 (dd, *J* = 6.0 Hz, *J* = 2.8 Hz, 1H), 2.32-2.44 (m, 1H), 1.40 (s, 9H), 1.00 (d, *J* = 6.4 Hz, 3H), 1.00 (d, *J* = 6.4 Hz, *J* = 6.4 Hz, 3H);

<sup>13</sup>C NMR (CDCl<sub>3</sub>, 100 MHz) δ 210.7, 165.4, 102.1, 90.7, 80.4, 28.0, 27.6, 22.22, 22.18;

IR (film) 2966, 2933, 2873, 2254, 1959, 1708, 1458, 1411, 1392, 1368, 1322, 1279, 1257, 1148 cm<sup>-1</sup>;

LRMS (EI) calcd for C<sub>11</sub>H<sub>18</sub>NaO<sub>2</sub> (M+Na) 205.12, found 205.12.

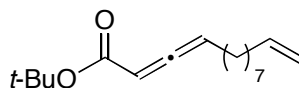

**(±)-tert-Butyl trideca-2,3,12-trienoate.** Prepared from 10-undecenoyl chloride according to the General Procedure (purification by flash chromatography: 20:1 hexane/Et<sub>2</sub>O; 28% yield).

<sup>1</sup>H NMR (CDCl<sub>3</sub>, 400 MHz) δ 5.76 (dddd, *J* = 17.2 Hz, *J* = 10.4 Hz, *J* = 6.4 Hz, *J* = 6.4 Hz, 1H), 5.49-5.56 (m, 1H), 5.42-5.46 (m, 1H), 4.95 (dd, *J* = 17.2 Hz, *J* = 1.2 Hz, 1H), 4.89 (ddd, *J* = 10.4 Hz, *J* = 1.2 Hz, *J* = 1.2 Hz, 1H), 2.04-2.11 (m, 2H), 1.97-2.04 (m, 2H), 1.44 (s, 9H), 1.23-1.43 (m, 10H);

<sup>13</sup>C NMR (CDCl<sub>3</sub>, 100 MHz) δ 211.8, 165.6, 139.1, 114.1, 95.0, 89.7, 80.6, 33.7, 29.2, 29.0, 28.84, 28.80, 28.7, 28.0, 27.5;

IR (film) 3077, 2978, 2928, 2856, 1961, 1719, 1641, 1457, 1415, 1392, 1368, 1282, 1257, 1145 cm<sup>-1</sup>;

LRMS (EI) calcd for C<sub>17</sub>H<sub>28</sub>NaO<sub>2</sub> (M+Na) 287.20, found 287.20.

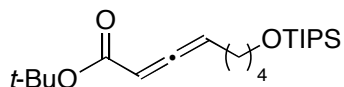

**(±)-tert-Butyl 8-((triisopropylsilyloxy)oxy)octa-2,3-dienoate.** Prepared from 6-(triisopropylsilyloxy)hexanoyl chloride<sup>1</sup> according to the General Procedure (purification by flash chromatography: 30:1 hexane/Et<sub>2</sub>O; 16% yield).

<sup>1</sup>H NMR (CDCl<sub>3</sub>, 400 MHz) δ 5.51-5.56 (m, 1H), 5.43-5.47 (m, 1H), 3.66 (t, *J* = 6.0 Hz, 2H), 2.09-2.16 (m, 2H), 1.46-1.61 (m, 4H), 1.44 (s, 9H), 1.00-1.10 (m, 21H);

<sup>13</sup>C NMR (CDCl<sub>3</sub>, 100 MHz) δ 211.8, 165.6, 95.0, 89.8, 80.6, 63.0, 32.2, 28.1, 27.4, 25.2, 18.0, 12.0;

IR (film) 3420, 2943, 2866, 1962, 1708, 1463, 1415, 1391, 1368, 1281, 1147, 1108, 1070, 1014 cm<sup>-1</sup>;

LRMS (EI) calcd for C<sub>21</sub>H<sub>40</sub>NaO<sub>3</sub>Si (M+Na) 391.26, found 391.26.

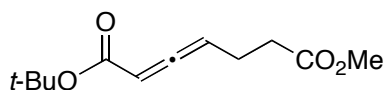

**(±)-1-tert-Butyl 7-methyl hepta-2,3-dienedioate.** Prepared from methyl 5-chloro-5-oxopentanoate according to the General Procedure (purification by flash chromatography: 9:1 hexane/ethyl acetate; 38% yield).

<sup>1</sup>H NMR (CDCl<sub>3</sub>, 400 MHz) δ 5.58-5.63 (m, 1H), 5.46-5.50 (m, 1H), 3.63 (s, 3H), 2.35-2.46 (m, 4H), 1.42 (s, 9H);

<sup>13</sup>C NMR (CDCl<sub>3</sub>, 100 MHz) δ 211.5, 172.8, 165.0, 93.8, 90.0, 80.8, 51.6, 32.8, 28.0, 22.6;

IR (film) 2979, 1962, 1740, 1708, 1480, 1438, 1416, 1393, 1368, 1286, 1257, 1147, 1055 cm<sup>-1</sup>;

LRMS (EI) calcd for C<sub>12</sub>H<sub>18</sub>NaO<sub>4</sub> (M+Na) 249.11, found 249.11.

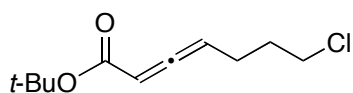

**(±)-tert-Butyl 7-chlorohepta-2,3-dienoate.** Prepared from 5-chlorovaleroyl chloride according to the General Procedure (purification by flash chromatography: 20:1 hexane/Et<sub>2</sub>O; 51% yield).

<sup>1</sup>H NMR (CDCl<sub>3</sub>, 400 MHz) δ 5.46-5.55 (m, 2H), 3.58 (t, *J* = 6.4 Hz, 2H), 2.20-2.29 (m, 2H), 1.84-1.95 (m, 2H), 1.43 (s, 9H);

<sup>13</sup>C NMR (CDCl<sub>3</sub>, 100 MHz) δ 211.8, 165.2, 93.4, 90.4, 80.9, 43.7, 31.1, 28.0, 24.5;

IR (film) 3404, 2979, 2936, 1962, 1706, 1479, 1456, 1415, 1393, 1368, 1283, 1257, 1146, 1041 cm<sup>-1</sup>;

(1) Duffy, R. J.; Morris, K. A.; Romo, D. J. *Am. Chem. Soc.* **2005**, *127*, 16754–16755.

LRMS (EI) calcd for C<sub>11</sub>H<sub>17</sub>ClNaO<sub>2</sub> (M+Na) 239.08, found 239.08.

### III. Phosphine-Catalyzed Enantioselective $\gamma$ Additions of Aryl Thiols

**General Procedure.** In the air, phosphepine (*R*)-**1** (27 mg, 0.050 mmol) and pivalic acid (26 mg, 0.25 mmol) were added to an oven-dried 20-mL vial, which was then capped (if the thiol is a solid, then it was also added to the vial at this time). The vial was evacuated and back-filled with nitrogen three times. Toluene (anhydrous; 5 mL) and the thiol (0.60 mmol) were added via syringe, and the vial was cooled to 10 °C. Next, the allene (0.50 mmol) was added in one portion via syringe, and the reaction mixture was stirred at 10 °C for 72 h. To quench the reaction, *tert*-butyl hydroperoxide (3.0 M solution in isooctane; 100  $\mu$ L) was added dropwise over 1 min. After 15 min, the reaction mixture was warmed to r.t., and a solution of Na<sub>2</sub>S<sub>2</sub>O<sub>3</sub> (20% aqueous solution; 5 mL) was added. The aqueous layer was extracted with Et<sub>2</sub>O (three times), and the combined organic layers were washed with brine, dried (Na<sub>2</sub>SO<sub>4</sub>), and concentrated under reduced pressure. The residue was purified by column chromatography.

Note: Thiols are susceptible to air oxidation to form disulfides. A control experiment indicated that the presence of a disulfide does not significantly affect the enantioselectivity of the  $\gamma$ -addition process.

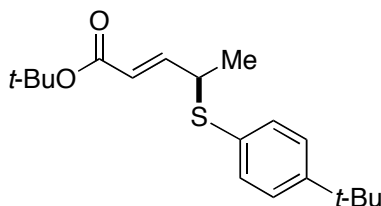

**(*E*)-*tert*-Butyl 4-(4-(*tert*-butyl)phenylthio)pent-2-enoate (Table 2, entry 1).** The compound was prepared according to the General Procedure from ( $\pm$ )-*tert*-butyl penta-2,3-dienoate (77 mg, 0.50 mmol) and 4-*tert*-butylthiophenol (103  $\mu$ L, 0.60 mmol). After purification by flash chromatography (4:1  $\rightarrow$  2:1 hexane/CH<sub>2</sub>Cl<sub>2</sub>), the title compound was isolated as a colorless oil (90 mg, 56% yield) with 83% ee.

$[\alpha]_D^{23} = +97$  ( $c = 1.0$ , CHCl<sub>3</sub>).

SFC analysis of the product: Daicel CHIRALPAK AD-H column; 2.5% MeOH in CO<sub>2</sub>; 3.0 mL/min; retention times: 2.72 min (major), 3.27 min (minor).

The second run was performed with (*S*)-**1**. The product was isolated as a colorless oil (96 mg, 60% yield) with 79% ee.

<sup>1</sup>H NMR (CDCl<sub>3</sub>, 400 MHz)  $\delta$  7.28-7.32 (m, 4H), 6.74 (dd,  $J = 15.6$  Hz,  $J = 8.4$  Hz, 1H), 5.46 (dd,  $J = 15.6$  Hz,  $J = 1.2$  Hz, 1H), 3.66-3.75 (m, 1H), 1.43 (s, 9H), 1.39 (d,  $J = 6.8$  Hz, 3H), 1.28 (s, 9H);

<sup>13</sup>C NMR (CDCl<sub>3</sub>, 100 MHz)  $\delta$  165.6, 151.1, 147.3, 133.7, 129.8, 125.8, 122.1, 80.2, 44.9, 34.6, 31.2, 28.1, 19.5;

IR (film) 2967, 2930, 2906, 2869, 1909, 1714, 1649, 1596, 1490, 1478, 1458, 1392, 1367, 1339, 1287, 1263, 1220, 1156, 1137, 1120, 1064, 1014  $\text{cm}^{-1}$ ;  
LRMS (EI) calcd for  $\text{C}_{19}\text{H}_{28}\text{O}_2\text{S}$  (M+) 320.18, found 320.20.

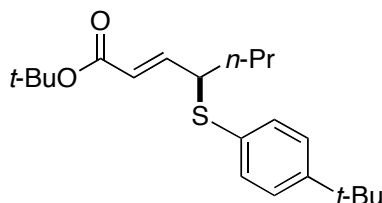

**(E)-tert-Butyl 4-(4-(tert-butyl)phenylthio)hept-2-enoate (Table 2, entry 2).** The compound was prepared according to the General Procedure from ( $\pm$ )-tert-butyl hepta-2,3-dienoate (91 mg, 0.50 mmol) and 4-tert-butylthiophenol (103  $\mu\text{L}$ , 0.60 mmol). After purification by flash chromatography (7:1:1  $\rightarrow$  2:1:1 hexane/toluene/ $\text{CH}_2\text{Cl}_2$ ), the title compound was isolated as a colorless oil (143 mg, 83% yield) with 90% ee.

$[\alpha]_{\text{D}}^{22} = +115$  ( $c = 1.0$ ,  $\text{CHCl}_3$ ).

SFC analysis of the product: Daicel CHIRALPAK IA-H column; 2.5% MeOH in  $\text{CO}_2$ ; 3.0 mL/min; retention times: 2.81 min (major), 3.08 min (minor).

The second run was performed with (S)-1. The product was isolated as a colorless oil (138 mg, 79% yield) with 92% ee.

$^1\text{H}$  NMR ( $\text{CDCl}_3$ , 400 MHz)  $\delta$  7.28 (s, 4H), 6.64 (dd,  $J = 15.6$  Hz,  $J = 9.2$  Hz, 1H), 5.38 (dd,  $J = 15.6$  Hz,  $J = 0.4$  Hz, 1H), 3.50-3.56 (m, 1H), 1.55-1.74 (m, 2H), 1.38-1.47 (m, 2H), 1.42 (s, 9H), 1.28 (s, 9H), 0.90 (t,  $J = 7.2$  Hz, 3H);

$^{13}\text{C}$  NMR ( $\text{CDCl}_3$ , 100 MHz)  $\delta$  165.6, 151.1, 146.6, 133.8, 129.9, 125.8, 122.8, 80.2, 50.7, 35.7, 34.6, 31.3, 28.1, 20.5, 13.8;

IR (film) 3078, 2963, 2933, 2872, 1714, 1647, 1597, 1559, 1540, 1490, 1458, 1393, 1367, 1337, 1292, 1268, 1257, 1232, 1153, 1132, 1120, 1089, 1014  $\text{cm}^{-1}$ ;

LRMS (EI) calcd for  $\text{C}_{21}\text{H}_{32}\text{O}_2\text{S}$  (M+) 348.21, found 348.20.

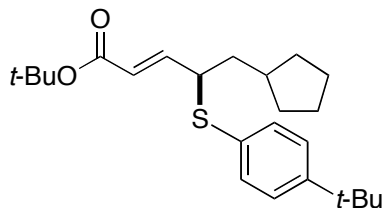

**(E)-tert-Butyl 4-(4-(tert-butyl)phenylthio)-5-cyclopentylpent-2-enoate (Table 2, entry 3).** The compound was prepared according to the General Procedure from ( $\pm$ )-tert-butyl 5-cyclopentylpenta-2,3-dienoate (111 mg, 0.50 mmol) and 4-tert-butylthiophenol (103  $\mu\text{L}$ , 0.60 mmol). After purification by flash chromatography (7:1:1  $\rightarrow$  6:1:1 hexane/toluene/ $\text{CH}_2\text{Cl}_2$ ), the title compound was isolated as a colorless semisolid (139 mg, 72% yield) with 91% ee.

$[\alpha]_D^{23} = +88$  ( $c = 1.0$ ,  $\text{CHCl}_3$ ).

SFC analysis of the product: Daicel CHIRALPAK IA column; 2.5% MeOH in  $\text{CO}_2$ ; 3.0 mL/min; retention times: 4.62 min (major), 5.07 min (minor).

The second run was performed with (S)-1. The product was isolated as a colorless semisolid (125 mg, 64% yield) with 90% ee.

Recrystallization from *n*-hexane gave a colorless needle, which was subjected to X-ray crystallography.

mp 69–72 °C;

$^1\text{H}$  NMR ( $\text{CDCl}_3$ , 400 MHz)  $\delta$  7.28 (s, 4H), 6.63 (dd,  $J = 15.2$  Hz,  $J = 9.4$  Hz, 1H), 5.34 (d,  $J = 15.2$  Hz, 1H), 3.50–3.57 (m, 1H), 1.88–1.98 (m, 1H), 1.71–1.81 (m, 2H), 1.65–1.70 (m, 2H), 1.45–1.62 (m, 4H), 1.42 (s, 9H), 1.28 (s, 9H), 1.01–1.12 (m, 2H);

$^{13}\text{C}$  NMR ( $\text{CDCl}_3$ , 100 MHz)  $\delta$  165.5, 151.0, 146.7, 133.8, 129.8, 125.7, 122.5, 80.1, 50.3, 39.9, 37.7, 34.5, 32.8, 32.1, 31.2, 28.1, 25.02, 24.99;

IR (film) 2954, 2868, 2361, 2340, 1714, 1646, 1559, 1540, 1506, 1490, 1457, 1393, 1366, 1327, 1294, 1232, 1144  $\text{cm}^{-1}$ ;

LRMS (ESI) calcd for  $\text{C}_{24}\text{H}_{36}\text{NaO}_2\text{S}$  (M+Na) 411.23, found 411.23.

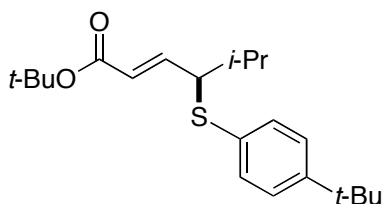

**(E)-tert-Butyl 4-(4-(tert-butyl)phenylthio)-5-methylhexa-2-enoate (Table 2, entry 4).** The compound was prepared according to the General Procedure from ( $\pm$ )-tert-butyl 5-methylhexa-2,3-dienoate (91 mg, 0.50 mmol) and 4-tert-butylthiophenol (103  $\mu\text{L}$ , 0.60 mmol). After purification by flash chromatography (4:1  $\rightarrow$  3:1 hexane/ $\text{CH}_2\text{Cl}_2$ ), the title compound was isolated as a colorless semisolid (104 mg, 60% yield) with 95% ee.

$[\alpha]_D^{23} = +159$  ( $c = 1.0$ ,  $\text{CHCl}_3$ ).

SFC analysis of the product: Daicel CHIRALPAK AD-H column; 2.5% MeOH in  $\text{CO}_2$ ; 3.0 mL/min; retention times: 2.73 min (major), 3.15 min (minor).

The second run was performed with (S)-1. The product was isolated as a colorless semisolid (108 mg, 62% yield) with 92% ee.

$^1\text{H}$  NMR ( $\text{CDCl}_3$ , 400 MHz)  $\delta$  7.27 (s, 4H), 6.68 (dd,  $J = 15.2$  Hz,  $J = 10.0$  Hz, 1H), 5.34 (dd,  $J = 15.2$  Hz,  $J = 0.6$  Hz, 1H), 3.35 (ddd,  $J = 10.0$  Hz,  $J = 6.4$  Hz,  $J = 0.6$  Hz, 1H), 1.92–2.01 (m, 1H), 1.42 (s, 9H), 1.28 (s, 9H), 1.06 (d,  $J = 6.8$  Hz, 3H), 1.01 (d,  $J = 6.8$  Hz, 3H);

$^{13}\text{C}$  NMR ( $\text{CDCl}_3$ , 100 MHz)  $\delta$  165.5, 150.8, 144.9, 133.5, 130.5, 125.8, 123.3, 80.1, 58.9, 34.5, 31.9, 31.2, 28.1, 20.6, 19.8;

IR (film) 2965, 2905, 2871, 1714, 1645, 1489, 1462, 1367, 1322, 1286, 1248, 1153, 1014  $\text{cm}^{-1}$ ;

LRMS (ESI) calcd for  $\text{C}_{21}\text{H}_{32}\text{O}_2\text{S}$  (M+) 348.21, found 348.20.

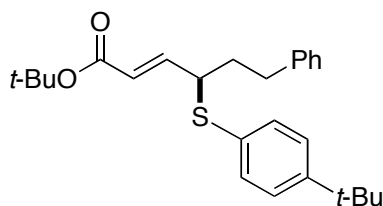

**(E)-tert-Butyl 4-(4-tert-butylphenylthio)-6-phenylhex-2-enoate (Table 2, entry 5).**

The compound was prepared according to the General Procedure from ( $\pm$ )-tert-butyl 6-phenylhexa-2,3-dienoate (129 mg, 0.50 mmol) and 4-tert-butylthiophenol (103  $\mu$ L, 0.60 mmol). After purification by flash chromatography (7:1:1  $\rightarrow$  6:1:1 hexane/toluene/ $\text{CH}_2\text{Cl}_2$ ), the title compound was isolated as a colorless semisolid (149 mg, 73% yield) with 92% ee.

$[\alpha]_D^{24} = +63$  (c = 1.0,  $\text{CHCl}_3$ ).

SFC analysis of the product: Daicel CHIRALCEL OJ-H column; 5% MeOH in  $\text{CO}_2$ ; 3.0 mL/min; retention times: 4.05 min (minor), 4.72 min (major).

The second run was performed with (S)-1. The product was isolated as a colorless semisolid (137 mg, 67% yield) with 90% ee.

$^1\text{H}$  NMR ( $\text{CDCl}_3$ , 400 MHz)  $\delta$  7.29 (s, 4H), 7.16-7.28 (m, 5H), 6.71 (dd,  $J = 15.6$  Hz,  $J = 9.2$  Hz, 1H), 5.41 (d,  $J = 15.6$  Hz, 1H), 3.47-3.56 (m, 1H), 2.71-2.85 (m, 2H), 1.91-2.09 (m, 2H), 1.45 (s, 9H), 1.30 (s, 9H);

$^{13}\text{C}$  NMR ( $\text{CDCl}_3$ , 100 MHz)  $\delta$  165.4, 151.2, 146.1, 140.9, 133.8, 129.4, 128.43, 128.41, 126.0, 125.8, 123.0, 80.2, 49.9, 34.9, 34.5, 33.2, 31.2, 28.1;

IR (film) 2965, 2867, 1714, 1647, 1603, 1559, 1490, 1456, 1393, 1367, 1292, 1148, 1120, 1014  $\text{cm}^{-1}$ ;

LRMS (ESI) calcd for  $\text{C}_{26}\text{H}_{34}\text{NaO}_2\text{S}$  (M+Na) 433.22, found 433.22.

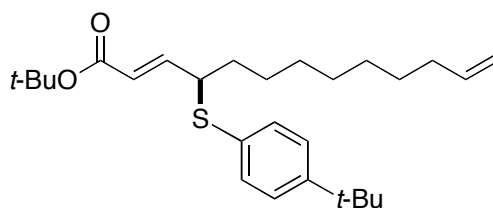

**(E)-tert-Butyl 4-(4-(tert-butyl)phenylthio)trideca-2,12-dienoate (Table 2, entry 6).**

The compound was prepared according to the General Procedure from ( $\pm$ )-tert-butyl trideca-2,3,12-trienoate (132 mg, 0.50 mmol) and 4-tert-butylthiophenol (103  $\mu$ L, 0.60 mmol). After purification by flash chromatography (8:1:1  $\rightarrow$  7:1:1 hexane/toluene/ $\text{CH}_2\text{Cl}_2$ ), the title compound was isolated as a colorless oil (154 mg, 72% yield) with 88% ee.

$[\alpha]_D^{24} = +86$  (c = 1.0,  $\text{CHCl}_3$ ).

SFC analysis of the product: Daicel CHIRALCEL OJ-H column; 5.0% MeOH in  $\text{CO}_2$ ; 3.0 mL/min; retention times: 2.25 min (minor), 2.67 min (major).

The second run was performed with (S)-1. The product was isolated as a colorless oil (148 mg, 69% yield) with 90% ee.

$^1\text{H}$  NMR ( $\text{CDCl}_3$ , 400 MHz)  $\delta$  7.28 (s, 4H), 6.64 (dd,  $J = 15.6$  Hz,  $J = 9.2$  Hz, 1H), 5.73-5.85 (m, 1H), 5.37 (d,  $J = 15.6$  Hz, 1H), 4.89-5.01 (m, 2H), 3.46-3.54 (m, 1H), 1.55-1.75 (m, 2H), 1.43 (s, 9H), 1.30-1.44 (m, 4H), 1.28 (s, 9H), 1.23-1.28 (m, 8H);

$^{13}\text{C}$  NMR ( $\text{CDCl}_3$ , 100 MHz)  $\delta$  165.5, 151.0, 146.6, 139.1, 133.7, 129.9, 125.8, 122.7, 114.2, 80.2, 50.9, 34.5, 33.8, 33.6, 31.2, 29.21, 29.20, 29.0, 28.8, 28.1, 27.2;

IR (film) 3077, 2966, 2929, 2856, 2361, 2340, 1714, 1645, 1490, 1459, 1392, 1367, 1292, 1269, 1256, 1150, 1120, 1014  $\text{cm}^{-1}$ ;

LRMS (ESI) calcd for  $\text{C}_{27}\text{H}_{42}\text{NaO}_2\text{S}$  (M+Na) 453.28, found 453.28.

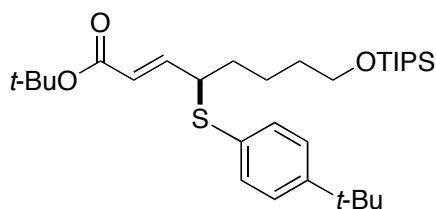

**(E)-tert-Butyl 4-(4-(tert-butyl)phenylthio)-8-triisopropoxyoct-2-enoate (Table 2, entry 7).** The compound was prepared according to the General Procedure from ( $\pm$ )-tert-butyl 8-(triisopropylsilyloxy)octa-2,3-dienoate (191 mg, 0.50 mmol) and 4-tert-butylthiophenol (103  $\mu\text{L}$ , 0.60 mmol). After purification by flash chromatography (4:1:1  $\rightarrow$  3:1:1 hexane/toluene/ $\text{CH}_2\text{Cl}_2$ ), the title compound was isolated as a colorless oil (179 mg, 67% yield) with 95% ee.

$[\alpha]_D^{24} = +63$  ( $c = 1.0$ ,  $\text{CHCl}_3$ ).

HPLC analysis of the product: Daicel CHIRALPAK AD-H column; 0.6% 2-PrOH in hexanes; 1.0 mL/min; retention times: 14.3 min (major), 18.4 min (minor).

The second run was performed with (S)-1. The product was isolated as a colorless oil (184 mg, 69% yield) with 94% ee.

$^1\text{H}$  NMR ( $\text{CDCl}_3$ , 400 MHz)  $\delta$  7.28 (s, 4H), 6.64 (dd,  $J = 15.2$  Hz,  $J = 9.4$  Hz, 1H), 5.38 (d,  $J = 15.2$  Hz, 1H), 3.62-3.68 (t,  $J = 6.0$  Hz, 2H), 3.48-3.54 (m, 1H), 1.45-1.78 (m, 6H), 1.41 (s, 9H), 1.24 (s, 9H), 1.03 (s, 21H);

$^{13}\text{C}$  NMR ( $\text{CDCl}_3$ , 100 MHz)  $\delta$  165.5, 151.0, 146.5, 133.8, 129.8, 125.8, 122.8, 80.1, 63.0, 50.9, 34.5, 33.4, 32.6, 31.2, 28.1, 23.7, 18.0, 12.0;

IR (film) 2942, 2866, 1715, 1647, 1490, 1463, 1392, 1367, 1293, 1255, 1150, 1108, 1070, 1014  $\text{cm}^{-1}$ ;

LRMS (ESI) calcd for  $\text{C}_{31}\text{H}_{54}\text{NaO}_3\text{SSi}$  (M+Na) 557.35, found 557.35.



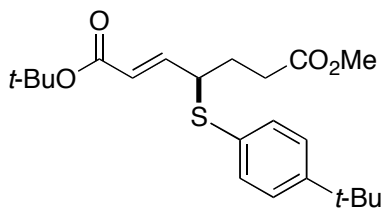

**(E)-tert-Butyl 7-methyl 4-(4-tert-butylphenylthio)hept-2-enedioate (Table 2, entry 8).** The compound was prepared according to the General Procedure from ( $\pm$ )-tert-butyl 7-methyl hepta-2,3-dienedioate (108 mg, 0.50 mmol) and 4-tert-butylthiophenol (103  $\mu$ L, 0.60 mmol). After purification by flash chromatography (25:1  $\rightarrow$  10:1 hexane/ethyl acetate; second column: 45:1  $\rightarrow$  35:1 toluene/Et<sub>2</sub>O), the title compound was isolated as a colorless oil (146 mg, 74% yield) with 91% ee.

$[\alpha]_D^{23} = +79$  (c = 1.0, CHCl<sub>3</sub>).

HPLC analysis of the product: Daicel CHIRALPAK AS-H column; 3.0% MeOH in hexanes; 1.0 mL/min; retention times: 5.14 min (major), 6.00 min (minor).

The second run was performed with (S)-1. The product was isolated as a colorless oil (149 mg, 76% yield) with 91% ee.

<sup>1</sup>H NMR (CDCl<sub>3</sub>, 400 MHz)  $\delta$  7.28 (s, 4H), 6.64 (dd,  $J = 15.6$  Hz,  $J = 8.8$  Hz, 1H), 5.43 (dd,  $J = 15.6$  Hz,  $J = 0.8$  Hz, 1H), 3.63 (s, 3H), 3.53-3.60 (m, 1H), 2.45-2.50 (m, 2H), 1.90-2.05 (m, 2H), 1.42 (s, 9H), 1.27 (s, 9H);

<sup>13</sup>C NMR (CDCl<sub>3</sub>, 100 MHz)  $\delta$  173.0, 165.2, 151.3, 145.4, 133.9, 129.0, 125.9, 123.3, 80.3, 51.6, 49.8, 34.5, 31.4, 31.1, 28.5, 28.0;

IR (film) 3410, 2965, 2870, 1739, 1713, 1647, 1490, 1437, 1393, 1367, 1291, 1256, 1149, 1120, 1014 cm<sup>-1</sup>;

LRMS (ESI) calcd for C<sub>22</sub>H<sub>32</sub>NaO<sub>4</sub>S (M+Na) 415.19, found 415.19.

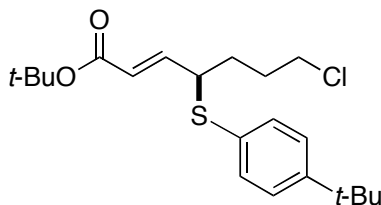

**(E)-tert-Butyl 4-(4-tert-butylphenylthio)-7-chlorohept-2-enoate (Table 2, entry 9).** The compound was prepared according to the General Procedure from ( $\pm$ )-tert-butyl 7-chlorohepta-2,3-dienoate (108 mg, 0.50 mmol) and 4-tert-butylthiophenol (103  $\mu$ L, 0.60 mmol). After purification by flash chromatography (4:1  $\rightarrow$  3:1 hexane/CH<sub>2</sub>Cl<sub>2</sub>), the title compound was isolated as a colorless semisolid (122 mg, 64% yield) with 90% ee.

$[\alpha]_D^{24} = +96$  (c = 1.0, CHCl<sub>3</sub>).

SFC analysis of the product: Daicel CHIRALCEL OD-H column; 5.0% MeOH in CO<sub>2</sub>; 3.0 mL/min; retention times: 3.35 min (minor), 3.56 min (major).

The second run was performed with (S)-1. The product was isolated as a colorless semisolid (128 mg, 67% yield) with 90% ee.

Recrystallization from *n*-hexane gave a colorless needle, which was subjected to X-ray crystallography.

mp 67–68 °C;

<sup>1</sup>H NMR (CDCl<sub>3</sub>, 400 MHz) δ 7.29 (s, 4H), 6.65 (dd, *J* = 15.6 Hz, *J* = 9.2 Hz, 1H), 5.40 (d, *J* = 15.6 Hz, 1H), 3.49–3.56 (m, 3H), 1.74–1.98 (m, 4H), 1.43 (s, 9H), 1.28 (s, 9H);

<sup>13</sup>C NMR (CDCl<sub>3</sub>, 100 MHz) δ 165.3, 151.3, 145.7, 134.0, 129.2, 125.9, 123.1, 80.3, 50.1, 44.4, 34.5, 31.2, 30.8, 30.1, 28.0;

IR (film) 2965, 2870, 1713, 1647, 1490, 1458, 1393, 1367, 1304, 1252, 1150, 1120, 1014 cm<sup>-1</sup>;

LRMS (ESI) calcd for C<sub>21</sub>H<sub>31</sub>ClNaO<sub>2</sub>S (M+Na) 405.16, found 405.16.

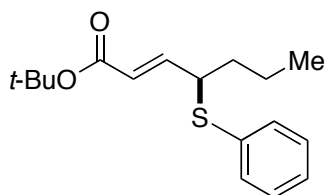

**(*E*)-tert-Butyl 4-phenylthiohept-2-enoate (Table 3, entry 1).** The compound was prepared according to the General Procedure from (±)-*tert*-butyl hepta-2,3-dienoate (91 mg, 0.50 mmol) and thiophenol (62 μL, 0.60 mmol). After purification by flash chromatography (6:1:1 → 2:1:1 hexane/toluene/CH<sub>2</sub>Cl<sub>2</sub>), the title compound was isolated as a colorless oil (105 mg, 72% yield) with 89% ee.

[α]<sub>D</sub><sup>22</sup> = +131 (c = 1.0, CHCl<sub>3</sub>).

SFC analysis of the product after reduction of the ester by DIBAL-H: Daicel CHIRALPAK AD-H column; 10% 2-PrOH in CO<sub>2</sub>; 3.0 mL/min; retention times: 3.05 min (major), 3.30 min (minor).

The second run was performed with (*S*)-**1**. The product was isolated as a colorless oil (106 mg, 73% yield) with 91% ee.

<sup>1</sup>H NMR (CDCl<sub>3</sub>, 400 MHz) δ 7.32–7.36 (m, 2H), 7.20–7.28 (m, 3H), 6.64 (dd, *J* = 15.6 Hz, *J* = 9.2 Hz, 1H), 5.41 (dd, *J* = 15.6 Hz, *J* = 0.4 Hz, 1H), 3.53–3.61 (m, 1H), 1.56–1.74 (m, 2H), 1.38–1.50 (m, 2H), 1.42 (s, 9H), 0.90 (t, *J* = 7.2 Hz, 3H);

<sup>13</sup>C NMR (CDCl<sub>3</sub>, 100 MHz) δ 165.4, 146.4, 133.53, 133.46, 128.7, 127.6, 122.9, 80.2, 50.4, 35.7, 28.0, 20.4, 13.7;

IR (film) 3059, 3005, 2961, 2933, 2873, 1951, 1713, 1647, 1584, 1478, 1457, 1439, 1392, 1367, 1338, 1292, 1257, 1232, 1152, 1091, 1069, 1025 cm<sup>-1</sup>;

LRMS (EI) calcd for C<sub>17</sub>H<sub>24</sub>O<sub>2</sub>S (M+) 292.15, found 292.10.

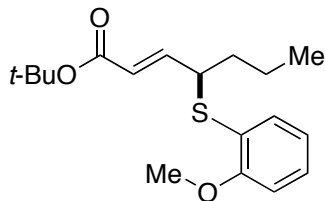

**(E)-tert-Butyl 4-((2-methoxyphenyl)thio)hept-2-enoate (Table 3, entry 2).** The compound was prepared according to the General Procedure from ( $\pm$ )-*tert*-butyl hepta-2,3-dienoate (91 mg, 0.50 mmol) and 2-methoxythiophenol (73  $\mu$ L, 0.60 mmol). After purification by flash chromatography (40:1  $\rightarrow$  20:1 hexane/ $\text{Et}_2\text{O}$ ), the title compound was isolated as a colorless oil (105 mg, 65% yield) with 89% ee.

$[\alpha]_D^{22} = +162$  ( $c = 1.0$ ,  $\text{CHCl}_3$ ).

SFC analysis of the product: Daicel CHIRALCEL OD-H column; 5% MeOH in  $\text{CO}_2$ ; 3.0 mL/min; retention times: 3.28 min (minor), 4.07 min (major).

The second run was performed with (*S*)-**1**. The product was isolated as a colorless oil (111 mg, 69% yield) with 90% ee.

$^1\text{H}$  NMR ( $\text{CDCl}_3$ , 400 MHz)  $\delta$  7.30 (dd,  $J = 7.6$  Hz,  $J = 1.6$  Hz, 1H), 7.20-7.25 (m, 1H), 6.80-6.87 (m, 2H), 6.64 (dd,  $J = 15.4$  Hz,  $J = 9.2$  Hz, 1H), 5.36 (d,  $J = 15.4$  Hz, 1H), 3.83 (s, 3H), 3.66-3.74 (m, 1H), 1.55-1.74 (m, 2H), 1.37-1.49 (m, 2H), 1.39 (s, 9H), 0.89 (t,  $J = 7.4$  Hz, 3H);

$^{13}\text{C}$  NMR ( $\text{CDCl}_3$ , 100 MHz)  $\delta$  165.5, 159.1, 146.7, 135.1, 129.4, 122.5, 121.4, 120.7, 110.7, 80.0, 55.6, 48.4, 35.7, 28.0, 20.5, 13.7;

IR (film) 3064, 3004, 2961, 2934, 2873, 2837, 1712, 1646, 1583, 1477, 1465, 1433, 1392, 1367, 1341, 1294, 1274, 1245, 1153, 1132, 1094, 1071, 1026  $\text{cm}^{-1}$ ;

LRMS (EI) calcd for  $\text{C}_{18}\text{H}_{26}\text{O}_3\text{S}$  ( $\text{M}^+$ ) 322.16, found 322.10.

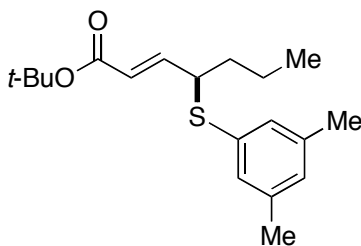

**(E)-tert-Butyl 4-((3,5-dimethylphenyl)thio)hept-2-enoate (Table 3, entry 3).** The compound was prepared according to the General Procedure from ( $\pm$ )-*tert*-butyl hepta-2,3-dienoate (91 mg, 0.50 mmol) and 3,5-dimethylthiophenol (82  $\mu$ L, 0.60 mmol). After purification by flash chromatography (6:1:1  $\rightarrow$  2:1:1 hexane/toluene/ $\text{CH}_2\text{Cl}_2$ ), the title compound was isolated as a colorless oil (128 mg, 80% yield) with 92% ee.

$[\alpha]_D^{22} = +130$  ( $c = 1.0$ ,  $\text{CHCl}_3$ ).

HPLC analysis of the product: Daicel CHIRALPAK AD-H column; 1.0% 2-PrOH in hexanes; 1.0 mL/min; retention times: 8.2 min (major), 9.6 min (minor).

The second run was performed with (S)-1. The product was isolated as a colorless oil (131 mg, 82% yield) with 92% ee.

$^1\text{H}$  NMR ( $\text{CDCl}_3$ , 400 MHz)  $\delta$  6.97 (s, 2H), 6.87 (s, 1H), 6.65 (dd,  $J = 15.6$  Hz,  $J = 9.2$  Hz, 1H), 5.39 (dd,  $J = 15.6$  Hz,  $J = 0.4$  Hz, 1H), 3.50-3.57 (m, 1H), 2.25 (s, 6H), 1.56-1.73 (m, 2H), 1.38-1.48 (m, 2H), 1.44 (s, 9H), 0.90 (t,  $J = 7.2$  Hz, 3H);

$^{13}\text{C}$  NMR ( $\text{CDCl}_3$ , 100 MHz)  $\delta$  165.6, 146.6, 138.3, 132.9, 131.4, 129.6, 122.8, 80.2, 50.5, 35.7, 28.1, 21.1, 20.5, 13.8;

IR (film) 2961, 2932, 2873, 2361, 1714, 1647, 1600, 1582, 1540, 1457, 1392, 1367, 1339, 1293, 1257, 1232, 1153, 1132, 1072, 1039  $\text{cm}^{-1}$ ;

LRMS (EI) calcd for  $\text{C}_{19}\text{H}_{28}\text{O}_2\text{S}$  (M+) 320.18, found 320.20.

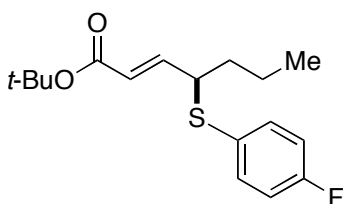

**(E)-tert-Butyl 4-((4-fluorophenyl)thio)hept-2-enoate (Table 3, entry 4).** The compound was prepared according to the General Procedure from ( $\pm$ )-tert-butyl hepta-2,3-dienoate (91 mg, 0.50 mmol) and 4-fluorothiophenol (64  $\mu\text{L}$ , 0.60 mmol). After purification by flash chromatography (4:1  $\rightarrow$  3:1 hexane/ $\text{CH}_2\text{Cl}_2$ ), the title compound was isolated as a colorless oil (96 mg, 62% yield) with 92% ee.

$[\alpha]_D^{22} = +97$  ( $c = 1.0$ ,  $\text{CHCl}_3$ ).

SFC analysis of the product: Daicel CHIRALPAK AD-H column; 2.5% 2-PrOH in  $\text{CO}_2$ ; 3.0 mL/min; retention times: 3.47 min (major), 3.80 min (minor).

The second run was performed with (S)-1. The product was isolated as a colorless oil (100 mg, 65% yield) with 90% ee.

$^1\text{H}$  NMR ( $\text{CDCl}_3$ , 400 MHz)  $\delta$  7.31-7.37 (m, 2H), 6.92-6.99 (m, 2H), 6.59 (dd,  $J = 15.6$  Hz,  $J = 9.2$  Hz, 1H), 5.31 (d,  $J = 15.6$  Hz, 1H), 3.42-3.50 (m, 1H), 1.53-1.71 (m, 2H), 1.37-1.46 (m, 2H), 1.42 (s, 9H), 0.89 (t,  $J = 7.6$  Hz, 3H);

$^{13}\text{C}$  NMR ( $\text{CDCl}_3$ , 100 MHz)  $\delta$  165.3, 162.7 (d,  $J = 247$  Hz), 146.1, 136.6 (d,  $J = 8$  Hz), 128.3 (d,  $J = 3$  Hz), 122.9, 115.8 (d,  $J = 21$  Hz), 80.3, 51.3, 35.4, 28.0, 20.4, 13.7;

IR (film) 2962, 2933, 2874, 2362, 2339, 1890, 1716, 1647, 1590, 1559, 1540, 1490, 1457, 1393, 1368, 1339, 1292, 1231, 1154, 1090  $\text{cm}^{-1}$ ;

LRMS (EI) calcd for  $\text{C}_{17}\text{H}_{23}\text{FO}_2\text{S}$  (M+) 310.14, found 310.10.

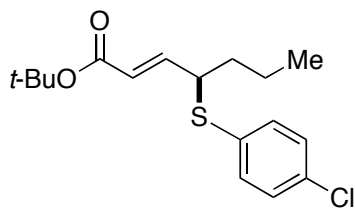

**(E)-tert-Butyl 4-((4-chlorophenyl)thio)hept-2-enoate (Table 3, entry 5).** The compound was prepared according to the General Procedure from ( $\pm$ )-*tert*-butyl hepta-2,3-dienoate (91 mg, 0.50 mmol) and 4-chlorothiophenol (87 mg, 0.60 mmol). After purification by flash chromatography (9:2  $\rightarrow$  1:1 hexane/ $\text{CH}_2\text{Cl}_2$ ), the title compound was isolated as a colorless oil (97 mg, 60% yield) with 92% ee.

$[\alpha]_D^{22} = +127$  ( $c = 1.0$ ,  $\text{CHCl}_3$ ).

SFC analysis of the product: Daicel CHIRALPAK AD-H column; 2.5% 2-PrOH in  $\text{CO}_2$ ; 3.0 mL/min; retention times: 6.18 min (major), 7.36 min (minor).

The second run was performed with (*S*)-**1**. The product was isolated as a colorless oil (93 mg, 57% yield) with 90% ee.

$^1\text{H}$  NMR ( $\text{CDCl}_3$ , 400 MHz)  $\delta$  7.27 (d,  $J = 8.8$  Hz, 2H), 7.22 (d,  $J = 8.8$  Hz, 2H), 6.60 (dd,  $J = 15.6$  Hz,  $J = 9.2$  Hz, 1H), 5.39 (dd,  $J = 15.6$  Hz,  $J = 0.8$  Hz, 1H), 3.50-3.57 (m, 1H), 1.58-1.72 (m, 2H), 1.37-1.47 (m, 2H), 1.43 (s, 9H), 0.90 (t,  $J = 7.2$  Hz, 3H);

$^{13}\text{C}$  NMR ( $\text{CDCl}_3$ , 100 MHz)  $\delta$  165.4, 146.1, 135.0, 134.0, 132.1, 129.0, 123.2, 80.5, 50.8, 35.6, 28.1, 20.5, 13.7;

IR (film) 2962, 2933, 2873, 1713, 1647, 1573, 1477, 1458, 1391, 1368, 1338, 1293, 1258, 1233, 1153, 1133, 1095, 1040, 1014  $\text{cm}^{-1}$ ;

LRMS (EI) calcd for  $\text{C}_{17}\text{H}_{23}\text{ClO}_2\text{S}$  ( $\text{M}^+$ ) 326.11, found 326.10.

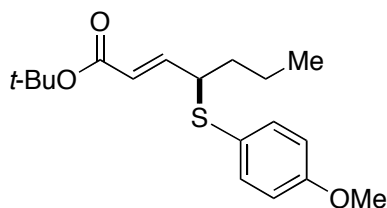

**(E)-tert-Butyl 4-((4-methoxyphenyl)thio)hept-2-enoate (Table 3, entry 6).** The compound was prepared according to the General Procedure from ( $\pm$ )-*tert*-butyl hepta-2,3-dienoate (91 mg, 0.50 mmol) and 4-methoxythiophenol (74  $\mu\text{L}$ , 0.60 mmol). After purification by flash chromatography (4:1  $\rightarrow$  1:1 hexane/ $\text{CH}_2\text{Cl}_2$ ), the title compound was isolated as a colorless oil (127 mg, 79% yield) with 89% ee.

$[\alpha]_D^{22} = +100$  ( $c = 1.0$ ,  $\text{CHCl}_3$ ).

HPLC analysis of the product: Daicel CHIRALPAK AS-H column; 1% 2-PrOH in hexanes; 1.0 mL/min; retention times: 5.23 min (major), 5.67 min (minor).

The second run was performed with (*S*)-**1**. The product was isolated as a colorless oil (118 mg, 73% yield) with 92% ee.

$^1\text{H}$  NMR ( $\text{CDCl}_3$ , 400 MHz)  $\delta$  7.29 (d,  $J = 7.8$  Hz, 2H), 6.78 (d,  $J = 7.8$  Hz, 2H), 6.61 (dd,  $J = 15.6$  Hz,  $J = 9.2$  Hz, 1H), 5.28 (d,  $J = 15.6$  Hz, 1H), 3.75 (s, 3H), 3.36-3.43 (m, 1H), 1.50-1.70 (m, 2H), 1.36-1.46 (m, 2H), 1.42 (s, 9H), 0.88 (t,  $J = 7.4$  Hz, 3H);

$^{13}\text{C}$  NMR ( $\text{CDCl}_3$ , 100 MHz)  $\delta$  165.5, 159.8, 146.6, 136.8, 123.4, 122.6, 114.2, 80.1, 55.2, 51.5, 35.4, 27.9, 20.5, 13.7;

IR (film) 3004, 2961, 2933, 2873, 2838, 2533, 2390, 2290, 2045, 1888, 1710, 1646, 1592, 1571, 1494, 1464, 1405, 1392, 1367, 1337, 1287, 1248, 1150, 1104, 1072, 1033, 1008  $\text{cm}^{-1}$ ;

LRMS (EI) calcd for  $\text{C}_{18}\text{H}_{26}\text{O}_3\text{S}$  (M+) 322.16, found 322.20.

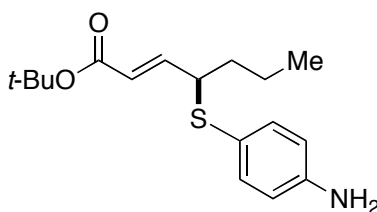

**(E)-tert-Butyl 4-((4-aminophenyl)thio)hept-2-enoate (Table 3, entry 7).** The compound was prepared according to the General Procedure from ( $\pm$ )-tert-butyl hepta-2,3-dienoate (91 mg, 0.50 mmol) and 4-aminothiophenol (75 mg, 0.60 mmol). The ee of the unpurified mixture was 86%. Purification by semi-preparative HPLC (Daicel Chiralcel OD-H, 1 cm x 25 cm, 92:8 hexane/2-PrOH, 10 cycles) gave the title compound as a light-yellow oil (96 mg, 63% yield).

$[\alpha]_D^{23} = +118$  ( $c = 1.0$ ,  $\text{CHCl}_3$ , 86% ee).

HPLC analysis of the product: Daicel CHIRALCEL OD-H column; 10% 2-PrOH in hexanes; 1.0 mL/min; retention times: 12.7 min (major), 13.5 min (minor).

The second run was performed with (S)-1. The ee of the unpurified mixture was 86%. Purification by semi-preparative HPLC gave the title compound as a light-yellow oil (100 mg, 65% yield).

$^1\text{H}$  NMR ( $\text{CDCl}_3$ , 400 MHz)  $\delta$  7.16 (d,  $J = 8.4$  Hz, 2H), 6.61 (dd,  $J = 15.4$  Hz,  $J = 9.4$  Hz, 1H), 6.54 (d,  $J = 8.4$  Hz, 2H), 5.29 (d,  $J = 15.4$  Hz, 1H), 3.75 (br s, 2H), 3.29-3.36 (m, 1H), 1.57-1.67 (m, 1H), 1.47-1.56 (m, 1H), 1.43 (s, 9H), 1.33-1.45 (m, 2H), 0.87 (t,  $J = 7.2$  Hz, 3H);

$^{13}\text{C}$  NMR ( $\text{CDCl}_3$ , 100 MHz)  $\delta$  165.6, 146.9, 146.8, 137.0, 122.3, 120.0, 115.1, 80.1, 51.6, 35.3, 28.1, 20.4, 13.7;

IR (film) 3471, 3375, 3223, 3027, 2961, 2932, 2873, 1700, 1624, 1598, 1496, 1457, 1424, 1392, 1368, 1338, 1294, 1257, 1234, 1153, 1095, 1072, 1040  $\text{cm}^{-1}$ ;

LRMS (ESI) calcd for  $\text{C}_{17}\text{H}_{25}\text{NNaSO}_2$  (M+Na) 330.15, found 330.15.

#### IV. Preparation of Catalyst 1

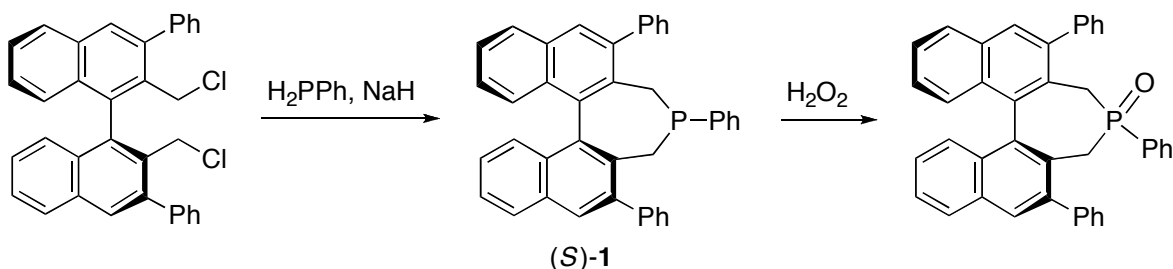

(S)-2,2'-Bis(chloromethyl)-3,3'-diphenyl-1,1'-binaphthalene<sup>2,3</sup> (6.78 g, 13.5 mmol) and a stir bar were added to an oven-dried 1000-mL flask, which was then evacuated and back-filled with nitrogen (three cycles). THF (650 mL; degassed, anhydrous), phenylphosphine (1.60 mL, 14.5 mmol), and sodium hydride (782 mg, 32.6 mmol) were added in turn, the flask was purged with argon for 1 min, and then the resulting mixture was stirred vigorously at 60 °C for 1 day. Next, phenylphosphine (0.30 mL, 2.7 mmol) and sodium hydride (170 mg, 7.08 mmol) were added in turn, the flask was purged with argon for 1 min, and the reaction was stirred at 60 °C for an additional 14 h (the disappearance of starting material was monitored by reverse-phase HPLC after oxidation of an aliquot by *t*-BuOOH). After the starting material had been consumed, the THF was removed under reduced pressure, CH<sub>2</sub>Cl<sub>2</sub> (200 mL) was added, and then water (200 mL) was cautiously added with stirring. The phases were separated, and the aqueous phase was extracted with CH<sub>2</sub>Cl<sub>2</sub> (100 mL). The combined organic phases were treated with 30% H<sub>2</sub>O<sub>2</sub> (7.63 g, 67.3 mmol) and stirred at r.t. for 30 min. Then, an aqueous solution of Na<sub>2</sub>S<sub>2</sub>O<sub>3</sub> (150 mL; 10%) was cautiously added. The phases were separated, and the aqueous phase was extracted with CH<sub>2</sub>Cl<sub>2</sub> (100 mL). The combined organic phases were dried over Na<sub>2</sub>SO<sub>4</sub> and concentrated under reduced pressure. The residue was purified by column chromatography (9:0 → 9:1 CH<sub>2</sub>Cl<sub>2</sub>/Et<sub>2</sub>O), which furnished 6.94 g of impure phosphine oxide. This material was dissolved in hot toluene (30 mL), and then the solution was allowed to cool to r.t. over 1 h and stirred at r.t. for an additional 30 min. The resulting white solid was collected by filtration, washed with toluene (3 mL) and hexane (10 mL), and dried under reduced pressure to afford the desired phosphine oxide (4.70 g, 63%) as a white powder.

(2) Ooi, T.; Kameda, M.; Maruoka, K. *J. Am. Chem. Soc.* **2003**, *125*, 5139–5151.

(3) Zhou, Y.-G.; Zhang, X. *Chem. Commun.* **2002**, 1124–1125.

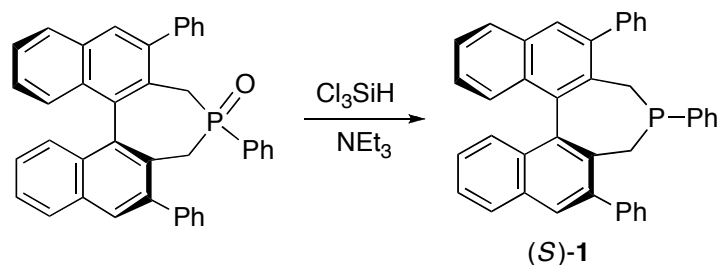

(11bR)-2,4,6-Triphenyl-4,5-dihydro-3H-dinaphtho[2,1-c:1',2'-e]phosphepine 4-oxide (4.70 g, 8.44 mmol) and a stir bar were added to an oven-dried 500-mL flask, which was then evacuated and back-filled with nitrogen (three cycles). Toluene (169 mL; degassed, anhydrous) was added via syringe. Triethylamine (8.23 mL, 59.2 mmol) and trichlorosilane (4.26 mL, 42.2 mmol) were added in turn, and the resulting slurry was stirred at 80 °C for 14 h. Next, the reaction mixture was allowed to cool to r.t., and degassed water (170 mL) was added dropwise over 5 min. The resulting slurry was stirred for 10 min, and then Celite (10 g) was added. In the air, the mixture was filtered through a pad of Celite, and the solid was washed with additional toluene (100 mL). The aqueous phase was separated, and the organic phase was washed successively with an aqueous solution of NaOH (170 mL; 0.5 M) and water (170 mL), dried over Na<sub>2</sub>SO<sub>4</sub>, and concentrated by rotary evaporation under reduced pressure. Next, the flask was back-filled with nitrogen, and under a nitrogen atmosphere the residue was dissolved in hot toluene (4.6 mL) and then cooled to 60 °C. Next, hexane (13.8 mL) was added dropwise over 1 min, and the resulting solution was cooled to r.t. with stirring, during which time a white precipitate was observed. After a significant amount of precipitation had occurred, the slurry was warmed to reflux for 1 min (white slurry) and then allowed to cool to 60 °C. Hexane (23 mL) was added dropwise over 3 min while maintaining the temperature near 60 °C. Next, the slurry was allowed to cool to r.t. with stirring for 2.5 h. The crystals were filtered in the air, washed with hexane (3 mL x3), and dried under reduced pressure to afford phosphepine **1** (3.57 g, 78%) as a white powder.

$[\alpha]_D^{24} = -117$  ( $c = 1.0$ , CHCl<sub>3</sub>).

<sup>1</sup>H NMR (CDCl<sub>3</sub>, 400 MHz)  $\delta$  7.93 (d,  $J = 8.0$  Hz, 1H), 7.90 (s, 1H), 7.85 (d,  $J = 8.0$  Hz, 1H), 7.70 (d,  $J = 7.2$  Hz, 2H), 7.64 (s, 1H), 7.33-7.48 (m, 5H), 7.03-7.28 (m, 11H), 6.80-6.86 (m, 2H), 6.50-6.90 (br s, 1H), 3.21 (dd,  $J = 14.4, 4.4$  Hz, 1H), 2.96 (dd,  $J = 14.8, 11.6$  Hz, 1H), 2.80 (dd,  $J = 11.6, 2.4$  Hz, 1H), 2.76 (dd,  $J = 14.4, 11.6$  Hz, 1H);

<sup>13</sup>C NMR (CDCl<sub>3</sub>, 100 MHz)  $\delta$  141.3 ( $J = 33$  Hz), 140.14 ( $J = 5$  Hz), 140.12 ( $J = 8$  Hz), 136.1 ( $J = 23$  Hz), 134.7 ( $J = 5$  Hz), 134.0 ( $J = 1$  Hz), 132.2, 132.1 ( $J = 2$  Hz), 131.66 ( $J = 1$  Hz), 131.64 (2C), 131.62, 131.56, 131.4, 131.2, 129.8 ( $J = 5$  Hz), 129.5, 129.2 ( $J = 2$  Hz), 128.7, 128.23, 128.18, 128.14, 128.12, 128.10, 127.2, 126.63, 126.60, 126.2, 125.9, 125.8, 125.5 ( $J = 1$  Hz), 125.2, 28.0 ( $J = 25$  Hz), 25.6 ( $J = 16$  Hz);

<sup>31</sup>P NMR (CDCl<sub>3</sub>, 162 MHz)  $\delta$  5.2;

IR (film) 3054, 1587, 1494, 1433, 1328, 1214, 1072, 1026, 1001 cm<sup>-1</sup>;

LRMS (ESI) calcd for C<sub>40</sub>H<sub>30</sub>P (M+H) 541.21, found 541.21.



## V. Determination of Absolute Configuration

Table 2, entry 3:

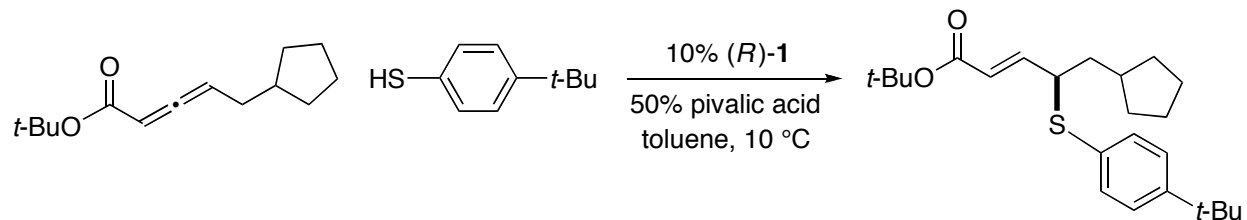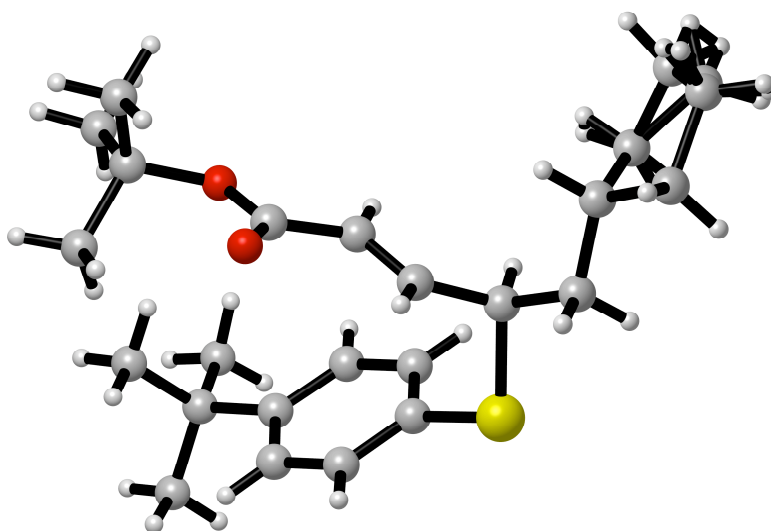

The cyclopentane ring is disordered.

Table 1. Crystal data and structure refinement for d10056.

|                                   |                                                  |          |
|-----------------------------------|--------------------------------------------------|----------|
| Identification code               | d10056                                           |          |
| Empirical formula                 | C <sub>24</sub> H <sub>36</sub> O <sub>2</sub> S |          |
| Formula weight                    | 388.59                                           |          |
| Temperature                       | 100(2) K                                         |          |
| Wavelength                        | 1.54178 Å                                        |          |
| Crystal system                    | Orthorhombic                                     |          |
| Space group                       | P2(1)2(1)2(1)                                    |          |
| Unit cell dimensions              | a = 6.01460(10) Å                                | α = 90°. |
|                                   | b = 18.8648(3) Å                                 | β = 90°. |
|                                   | c = 20.1082(3) Å                                 | γ = 90°. |
| Volume                            | 2281.56(6) Å <sup>3</sup>                        |          |
| Z                                 | 4                                                |          |
| Density (calculated)              | 1.131 Mg/m <sup>3</sup>                          |          |
| Absorption coefficient            | 1.360 mm <sup>-1</sup>                           |          |
| F(000)                            | 848                                              |          |
| Crystal size                      | 0.40 x 0.35 x 0.30 mm <sup>3</sup>               |          |
| Theta range for data collection   | 3.21 to 69.32°.                                  |          |
| Index ranges                      | -7 ≤ h ≤ 7, -22 ≤ k ≤ 20, -24 ≤ l ≤ 24           |          |
| Reflections collected             | 45400                                            |          |
| Independent reflections           | 4267 [R(int) = 0.0304]                           |          |
| Completeness to theta = 69.32°    | 100.0 %                                          |          |
| Absorption correction             | Semi-empirical from equivalents                  |          |
| Max. and min. transmission        | 0.6857 and 0.6122                                |          |
| Refinement method                 | Full-matrix least-squares on F <sup>2</sup>      |          |
| Data / restraints / parameters    | 4267 / 12 / 260                                  |          |
| Goodness-of-fit on F <sup>2</sup> | 1.041                                            |          |
| Final R indices [I > 2σ(I)]       | R1 = 0.0279, wR2 = 0.0721                        |          |
| R indices (all data)              | R1 = 0.0285, wR2 = 0.0728                        |          |
| Absolute structure parameter      | 0.008(11)                                        |          |
| Largest diff. peak and hole       | 0.171 and -0.179 e.Å <sup>-3</sup>               |          |

Table 2. Atomic coordinates ( $\times 10^4$ ) and equivalent isotropic displacement parameters ( $\text{\AA}^2 \times 10^3$ ) for d10056.  $U(\text{eq})$  is defined as one third of the trace of the orthogonalized  $U^{ij}$  tensor.

|        | x        | y       | z       | $U(\text{eq})$ |
|--------|----------|---------|---------|----------------|
| S(1)   | 1378(1)  | 6617(1) | 4737(1) | 21(1)          |
| C(1)   | 3628(2)  | 6513(1) | 4117(1) | 19(1)          |
| C(2)   | 4185(2)  | 5743(1) | 4070(1) | 20(1)          |
| C(3)   | 6027(2)  | 5450(1) | 4308(1) | 20(1)          |
| C(4)   | 6342(2)  | 4669(1) | 4294(1) | 18(1)          |
| O(1)   | 5136(2)  | 4257(1) | 4008(1) | 22(1)          |
| O(2)   | 8160(2)  | 4493(1) | 4649(1) | 20(1)          |
| C(5)   | 8830(2)  | 3743(1) | 4728(1) | 19(1)          |
| C(6)   | 6957(2)  | 3317(1) | 5042(1) | 24(1)          |
| C(7)   | 9562(2)  | 3448(1) | 4058(1) | 26(1)          |
| C(8)   | 10796(2) | 3794(1) | 5202(1) | 24(1)          |
| C(9)   | 2757(2)  | 6831(1) | 3463(1) | 20(1)          |
| C(10)  | 4567(2)  | 6906(1) | 2939(1) | 23(1)          |
| C(11)  | 3711(3)  | 7177(1) | 2266(1) | 31(1)          |
| C(12)  | 5769(3)  | 7471(1) | 1913(1) | 36(1)          |
| C(13)  | 7515(9)  | 7576(4) | 2445(2) | 34(1)          |
| C(13A) | 7070(12) | 7847(5) | 2460(3) | 33(2)          |
| C(14)  | 6388(3)  | 7446(1) | 3114(1) | 33(1)          |
| C(21)  | 2645(2)  | 6220(1) | 5445(1) | 20(1)          |
| C(22)  | 1713(2)  | 5615(1) | 5724(1) | 22(1)          |
| C(23)  | 2725(2)  | 5296(1) | 6266(1) | 23(1)          |
| C(24)  | 4698(2)  | 5558(1) | 6538(1) | 19(1)          |
| C(31)  | 5822(2)  | 5165(1) | 7112(1) | 23(1)          |
| C(32)  | 4165(3)  | 5026(1) | 7677(1) | 31(1)          |
| C(33)  | 7787(3)  | 5580(1) | 7402(1) | 29(1)          |
| C(34)  | 6686(3)  | 4453(1) | 6844(1) | 34(1)          |
| C(25)  | 5597(2)  | 6163(1) | 6249(1) | 24(1)          |
| C(26)  | 4583(3)  | 6494(1) | 5711(1) | 25(1)          |

Table 3. Bond lengths [ $\text{\AA}$ ] and angles [ $^\circ$ ] for d10056.

---

|              |            |
|--------------|------------|
| S(1)-C(21)   | 1.7809(13) |
| S(1)-C(1)    | 1.8507(14) |
| C(1)-C(2)    | 1.4924(18) |
| C(1)-C(9)    | 1.5379(17) |
| C(1)-H(1A)   | 1.0000     |
| C(2)-C(3)    | 1.3273(19) |
| C(2)-H(2A)   | 0.9500     |
| C(3)-C(4)    | 1.4873(18) |
| C(3)-H(3A)   | 0.9500     |
| C(4)-O(1)    | 1.2078(17) |
| C(4)-O(2)    | 1.3478(16) |
| O(2)-C(5)    | 1.4793(14) |
| C(5)-C(7)    | 1.5213(18) |
| C(5)-C(8)    | 1.5215(18) |
| C(5)-C(6)    | 1.5219(18) |
| C(6)-H(6A)   | 0.9800     |
| C(6)-H(6B)   | 0.9800     |
| C(6)-H(6C)   | 0.9800     |
| C(7)-H(7A)   | 0.9800     |
| C(7)-H(7B)   | 0.9800     |
| C(7)-H(7C)   | 0.9800     |
| C(8)-H(8A)   | 0.9800     |
| C(8)-H(8B)   | 0.9800     |
| C(8)-H(8C)   | 0.9800     |
| C(9)-C(10)   | 1.5213(19) |
| C(9)-H(9A)   | 0.9900     |
| C(9)-H(9B)   | 0.9900     |
| C(10)-C(14)  | 1.536(2)   |
| C(10)-C(11)  | 1.5365(19) |
| C(10)-H(10A) | 1.0000     |
| C(11)-C(12)  | 1.531(2)   |
| C(11)-H(11A) | 0.9900     |
| C(11)-H(11B) | 0.9900     |
| C(12)-C(13)  | 1.513(5)   |

|               |            |
|---------------|------------|
| C(12)-C(13A)  | 1.525(6)   |
| C(12)-H(12A)  | 0.9900     |
| C(12)-H(12B)  | 0.9900     |
| C(12)-H(12C)  | 0.9900     |
| C(12)-H(12D)  | 0.9900     |
| C(13)-C(14)   | 1.526(5)   |
| C(13)-H(13A)  | 0.9900     |
| C(13)-H(13B)  | 0.9900     |
| C(13A)-C(14)  | 1.572(6)   |
| C(13A)-H(13C) | 0.9900     |
| C(13A)-H(13D) | 0.9900     |
| C(14)-H(14A)  | 0.9900     |
| C(14)-H(14B)  | 0.9900     |
| C(14)-H(14C)  | 0.9900     |
| C(14)-H(14D)  | 0.9900     |
| C(21)-C(26)   | 1.383(2)   |
| C(21)-C(22)   | 1.3890(19) |
| C(22)-C(23)   | 1.386(2)   |
| C(22)-H(22A)  | 0.9500     |
| C(23)-C(24)   | 1.3964(19) |
| C(23)-H(23A)  | 0.9500     |
| C(24)-C(25)   | 1.3915(19) |
| C(24)-C(31)   | 1.5292(18) |
| C(31)-C(33)   | 1.533(2)   |
| C(31)-C(32)   | 1.534(2)   |
| C(31)-C(34)   | 1.537(2)   |
| C(32)-H(32A)  | 0.9800     |
| C(32)-H(32B)  | 0.9800     |
| C(32)-H(32C)  | 0.9800     |
| C(33)-H(33A)  | 0.9800     |
| C(33)-H(33B)  | 0.9800     |
| C(33)-H(33C)  | 0.9800     |
| C(34)-H(34A)  | 0.9800     |
| C(34)-H(34B)  | 0.9800     |
| C(34)-H(34C)  | 0.9800     |
| C(25)-C(26)   | 1.389(2)   |

|                  |            |
|------------------|------------|
| C(25)-H(25A)     | 0.9500     |
| C(26)-H(26A)     | 0.9500     |
| C(21)-S(1)-C(1)  | 100.42(6)  |
| C(2)-C(1)-C(9)   | 113.69(10) |
| C(2)-C(1)-S(1)   | 108.07(9)  |
| C(9)-C(1)-S(1)   | 106.58(9)  |
| C(2)-C(1)-H(1A)  | 109.5      |
| C(9)-C(1)-H(1A)  | 109.5      |
| S(1)-C(1)-H(1A)  | 109.5      |
| C(3)-C(2)-C(1)   | 124.71(13) |
| C(3)-C(2)-H(2A)  | 117.6      |
| C(1)-C(2)-H(2A)  | 117.6      |
| C(2)-C(3)-C(4)   | 120.82(12) |
| C(2)-C(3)-H(3A)  | 119.6      |
| C(4)-C(3)-H(3A)  | 119.6      |
| O(1)-C(4)-O(2)   | 125.52(12) |
| O(1)-C(4)-C(3)   | 124.79(12) |
| O(2)-C(4)-C(3)   | 109.70(11) |
| C(4)-O(2)-C(5)   | 120.86(10) |
| O(2)-C(5)-C(7)   | 109.51(10) |
| O(2)-C(5)-C(8)   | 102.60(10) |
| C(7)-C(5)-C(8)   | 110.62(11) |
| O(2)-C(5)-C(6)   | 110.35(10) |
| C(7)-C(5)-C(6)   | 112.89(11) |
| C(8)-C(5)-C(6)   | 110.38(11) |
| C(5)-C(6)-H(6A)  | 109.5      |
| C(5)-C(6)-H(6B)  | 109.5      |
| H(6A)-C(6)-H(6B) | 109.5      |
| C(5)-C(6)-H(6C)  | 109.5      |
| H(6A)-C(6)-H(6C) | 109.5      |
| H(6B)-C(6)-H(6C) | 109.5      |
| C(5)-C(7)-H(7A)  | 109.5      |
| C(5)-C(7)-H(7B)  | 109.5      |
| H(7A)-C(7)-H(7B) | 109.5      |
| C(5)-C(7)-H(7C)  | 109.5      |

|                     |            |
|---------------------|------------|
| H(7A)-C(7)-H(7C)    | 109.5      |
| H(7B)-C(7)-H(7C)    | 109.5      |
| C(5)-C(8)-H(8A)     | 109.5      |
| C(5)-C(8)-H(8B)     | 109.5      |
| H(8A)-C(8)-H(8B)    | 109.5      |
| C(5)-C(8)-H(8C)     | 109.5      |
| H(8A)-C(8)-H(8C)    | 109.5      |
| H(8B)-C(8)-H(8C)    | 109.5      |
| C(10)-C(9)-C(1)     | 112.62(11) |
| C(10)-C(9)-H(9A)    | 109.1      |
| C(1)-C(9)-H(9A)     | 109.1      |
| C(10)-C(9)-H(9B)    | 109.1      |
| C(1)-C(9)-H(9B)     | 109.1      |
| H(9A)-C(9)-H(9B)    | 107.8      |
| C(9)-C(10)-C(14)    | 114.41(12) |
| C(9)-C(10)-C(11)    | 113.66(12) |
| C(14)-C(10)-C(11)   | 102.71(12) |
| C(9)-C(10)-H(10A)   | 108.6      |
| C(14)-C(10)-H(10A)  | 108.6      |
| C(11)-C(10)-H(10A)  | 108.6      |
| C(12)-C(11)-C(10)   | 104.94(13) |
| C(12)-C(11)-H(11A)  | 110.8      |
| C(10)-C(11)-H(11A)  | 110.8      |
| C(12)-C(11)-H(11B)  | 110.8      |
| C(10)-C(11)-H(11B)  | 110.8      |
| H(11A)-C(11)-H(11B) | 108.8      |
| C(13)-C(12)-C(13A)  | 21.89(17)  |
| C(13)-C(12)-C(11)   | 106.3(2)   |
| C(13A)-C(12)-C(11)  | 104.4(3)   |
| C(13)-C(12)-H(12A)  | 110.5      |
| C(13A)-C(12)-H(12A) | 129.3      |
| C(11)-C(12)-H(12A)  | 110.5      |
| C(13)-C(12)-H(12B)  | 110.5      |
| C(13A)-C(12)-H(12B) | 91.6       |
| C(11)-C(12)-H(12B)  | 110.5      |
| H(12A)-C(12)-H(12B) | 108.7      |

|                      |           |
|----------------------|-----------|
| C(13)-C(12)-H(12C)   | 90.4      |
| C(13A)-C(12)-H(12C)  | 110.9     |
| C(11)-C(12)-H(12C)   | 110.9     |
| H(12A)-C(12)-H(12C)  | 21.6      |
| H(12B)-C(12)-H(12C)  | 125.3     |
| C(13)-C(12)-H(12D)   | 127.4     |
| C(13A)-C(12)-H(12D)  | 110.9     |
| C(11)-C(12)-H(12D)   | 110.9     |
| H(12A)-C(12)-H(12D)  | 89.9      |
| H(12B)-C(12)-H(12D)  | 20.7      |
| H(12C)-C(12)-H(12D)  | 108.9     |
| C(12)-C(13)-C(14)    | 107.1(3)  |
| C(12)-C(13)-H(13A)   | 110.3     |
| C(14)-C(13)-H(13A)   | 110.3     |
| C(12)-C(13)-H(13B)   | 110.3     |
| C(14)-C(13)-H(13B)   | 110.3     |
| H(13A)-C(13)-H(13B)  | 108.6     |
| C(12)-C(13A)-C(14)   | 104.3(4)  |
| C(12)-C(13A)-H(13C)  | 110.9     |
| C(14)-C(13A)-H(13C)  | 110.9     |
| C(12)-C(13A)-H(13D)  | 110.9     |
| C(14)-C(13A)-H(13D)  | 110.9     |
| H(13C)-C(13A)-H(13D) | 108.9     |
| C(13)-C(14)-C(10)    | 102.8(2)  |
| C(13)-C(14)-C(13A)   | 21.40(17) |
| C(10)-C(14)-C(13A)   | 108.2(2)  |
| C(13)-C(14)-H(14A)   | 111.2     |
| C(10)-C(14)-H(14A)   | 111.2     |
| C(13A)-C(14)-H(14A)  | 90.2      |
| C(13)-C(14)-H(14B)   | 111.2     |
| C(10)-C(14)-H(14B)   | 111.2     |
| C(13A)-C(14)-H(14B)  | 124.8     |
| H(14A)-C(14)-H(14B)  | 109.1     |
| C(13)-C(14)-H(14C)   | 93.7      |
| C(10)-C(14)-H(14C)   | 110.0     |
| C(13A)-C(14)-H(14C)  | 110.0     |



|                     |            |
|---------------------|------------|
| H(14A)-C(14)-H(14C) | 124.6      |
| H(14B)-C(14)-H(14C) | 19.0       |
| C(13)-C(14)-H(14D)  | 130.1      |
| C(10)-C(14)-H(14D)  | 110.0      |
| C(13A)-C(14)-H(14D) | 110.0      |
| H(14A)-C(14)-H(14D) | 21.3       |
| H(14B)-C(14)-H(14D) | 90.8       |
| H(14C)-C(14)-H(14D) | 108.4      |
| C(26)-C(21)-C(22)   | 119.41(13) |
| C(26)-C(21)-S(1)    | 120.86(11) |
| C(22)-C(21)-S(1)    | 119.70(11) |
| C(23)-C(22)-C(21)   | 119.77(13) |
| C(23)-C(22)-H(22A)  | 120.1      |
| C(21)-C(22)-H(22A)  | 120.1      |
| C(22)-C(23)-C(24)   | 121.90(12) |
| C(22)-C(23)-H(23A)  | 119.1      |
| C(24)-C(23)-H(23A)  | 119.1      |
| C(25)-C(24)-C(23)   | 117.12(12) |
| C(25)-C(24)-C(31)   | 122.81(12) |
| C(23)-C(24)-C(31)   | 120.03(12) |
| C(24)-C(31)-C(33)   | 112.32(12) |
| C(24)-C(31)-C(32)   | 110.76(12) |
| C(33)-C(31)-C(32)   | 107.84(12) |
| C(24)-C(31)-C(34)   | 107.93(11) |
| C(33)-C(31)-C(34)   | 108.59(13) |
| C(32)-C(31)-C(34)   | 109.35(13) |
| C(31)-C(32)-H(32A)  | 109.5      |
| C(31)-C(32)-H(32B)  | 109.5      |
| H(32A)-C(32)-H(32B) | 109.5      |
| C(31)-C(32)-H(32C)  | 109.5      |
| H(32A)-C(32)-H(32C) | 109.5      |
| H(32B)-C(32)-H(32C) | 109.5      |
| C(31)-C(33)-H(33A)  | 109.5      |
| C(31)-C(33)-H(33B)  | 109.5      |
| H(33A)-C(33)-H(33B) | 109.5      |
| C(31)-C(33)-H(33C)  | 109.5      |

|                     |            |
|---------------------|------------|
| H(33A)-C(33)-H(33C) | 109.5      |
| H(33B)-C(33)-H(33C) | 109.5      |
| C(31)-C(34)-H(34A)  | 109.5      |
| C(31)-C(34)-H(34B)  | 109.5      |
| H(34A)-C(34)-H(34B) | 109.5      |
| C(31)-C(34)-H(34C)  | 109.5      |
| H(34A)-C(34)-H(34C) | 109.5      |
| H(34B)-C(34)-H(34C) | 109.5      |
| C(26)-C(25)-C(24)   | 121.58(13) |
| C(26)-C(25)-H(25A)  | 119.2      |
| C(24)-C(25)-H(25A)  | 119.2      |
| C(21)-C(26)-C(25)   | 120.20(13) |
| C(21)-C(26)-H(26A)  | 119.9      |
| C(25)-C(26)-H(26A)  | 119.9      |

---

Symmetry transformations used to generate equivalent atoms:

Table 4. Anisotropic displacement parameters ( $\text{\AA}^2 \times 10^3$ ) for d10056. The anisotropic displacement factor exponent takes the form:  $-2\pi^2 [ h^2 a^{*2} U^{11} + \dots + 2 h k a^* b^* U^{12} ]$

|        | U <sup>11</sup> | U <sup>22</sup> | U <sup>33</sup> | U <sup>23</sup> | U <sup>13</sup> | U <sup>12</sup> |
|--------|-----------------|-----------------|-----------------|-----------------|-----------------|-----------------|
| S(1)   | 23(1)           | 19(1)           | 20(1)           | 3(1)            | 0(1)            | 5(1)            |
| C(1)   | 19(1)           | 19(1)           | 20(1)           | 0(1)            | 1(1)            | 1(1)            |
| C(2)   | 23(1)           | 20(1)           | 16(1)           | 0(1)            | -1(1)           | 0(1)            |
| C(3)   | 20(1)           | 18(1)           | 21(1)           | 1(1)            | -1(1)           | 0(1)            |
| C(4)   | 17(1)           | 21(1)           | 17(1)           | 1(1)            | 3(1)            | 2(1)            |
| O(1)   | 24(1)           | 20(1)           | 24(1)           | -2(1)           | -4(1)           | 1(1)            |
| O(2)   | 19(1)           | 15(1)           | 25(1)           | 1(1)            | -3(1)           | 3(1)            |
| C(5)   | 21(1)           | 14(1)           | 22(1)           | 2(1)            | 1(1)            | 3(1)            |
| C(6)   | 26(1)           | 20(1)           | 26(1)           | 4(1)            | 1(1)            | 0(1)            |
| C(7)   | 29(1)           | 24(1)           | 24(1)           | 1(1)            | 2(1)            | 8(1)            |
| C(8)   | 22(1)           | 22(1)           | 28(1)           | 0(1)            | -3(1)           | 4(1)            |
| C(9)   | 21(1)           | 18(1)           | 23(1)           | 2(1)            | -4(1)           | 2(1)            |
| C(10)  | 26(1)           | 21(1)           | 21(1)           | 1(1)            | 0(1)            | 6(1)            |
| C(11)  | 35(1)           | 34(1)           | 24(1)           | 6(1)            | -4(1)           | -4(1)           |
| C(12)  | 39(1)           | 38(1)           | 29(1)           | 11(1)           | 7(1)            | 5(1)            |
| C(13)  | 32(2)           | 29(3)           | 39(2)           | 6(2)            | 8(2)            | -2(2)           |
| C(13A) | 26(3)           | 31(4)           | 43(2)           | 7(2)            | 9(2)            | 3(2)            |
| C(14)  | 24(1)           | 44(1)           | 31(1)           | 4(1)            | 0(1)            | -4(1)           |
| C(21)  | 24(1)           | 16(1)           | 19(1)           | -1(1)           | 2(1)            | 5(1)            |
| C(22)  | 19(1)           | 24(1)           | 23(1)           | 0(1)            | 0(1)            | -2(1)           |
| C(23)  | 23(1)           | 22(1)           | 23(1)           | 5(1)            | 1(1)            | -4(1)           |
| C(24)  | 22(1)           | 20(1)           | 15(1)           | -3(1)           | 3(1)            | 0(1)            |
| C(31)  | 26(1)           | 25(1)           | 18(1)           | 2(1)            | 0(1)            | 0(1)            |
| C(32)  | 34(1)           | 41(1)           | 20(1)           | 8(1)            | 0(1)            | -4(1)           |
| C(33)  | 28(1)           | 38(1)           | 19(1)           | 1(1)            | -4(1)           | -1(1)           |
| C(34)  | 40(1)           | 30(1)           | 33(1)           | 0(1)            | -10(1)          | 10(1)           |
| C(25)  | 29(1)           | 22(1)           | 21(1)           | -2(1)           | -3(1)           | -7(1)           |
| C(26)  | 35(1)           | 16(1)           | 24(1)           | 1(1)            | -2(1)           | -7(1)           |

Table 5. Hydrogen coordinates ( $\times 10^4$ ) and isotropic displacement parameters ( $\text{\AA}^2 \times 10^{-3}$ ) for d10056.

|        | x     | y    | z    | U(eq) |
|--------|-------|------|------|-------|
| H(1A)  | 4969  | 6783 | 4266 | 23    |
| H(2A)  | 3146  | 5442 | 3854 | 23    |
| H(3A)  | 7158  | 5744 | 4490 | 23    |
| H(6A)  | 6408  | 3566 | 5437 | 36    |
| H(6B)  | 7514  | 2848 | 5171 | 36    |
| H(6C)  | 5743  | 3262 | 4721 | 36    |
| H(7A)  | 8304  | 3455 | 3749 | 39    |
| H(7B)  | 10083 | 2960 | 4115 | 39    |
| H(7C)  | 10772 | 3740 | 3880 | 39    |
| H(8A)  | 11933 | 4105 | 5009 | 36    |
| H(8B)  | 11423 | 3321 | 5273 | 36    |
| H(8C)  | 10297 | 3990 | 5628 | 36    |
| H(9A)  | 1559  | 6524 | 3286 | 25    |
| H(9B)  | 2107  | 7303 | 3554 | 25    |
| H(10A) | 5278  | 6433 | 2870 | 28    |
| H(11A) | 3039  | 6787 | 2006 | 37    |
| H(11B) | 2584  | 7554 | 2329 | 37    |
| H(12A) | 6303  | 7132 | 1572 | 43    |
| H(12B) | 5419  | 7927 | 1693 | 43    |
| H(12C) | 6659  | 7083 | 1715 | 43    |
| H(12D) | 5341  | 7807 | 1557 | 43    |
| H(13A) | 8114  | 8065 | 2426 | 40    |
| H(13B) | 8758  | 7239 | 2381 | 40    |
| H(13C) | 6655  | 8354 | 2485 | 40    |
| H(13D) | 8690  | 7809 | 2381 | 40    |
| H(14A) | 5739  | 7888 | 3294 | 40    |
| H(14B) | 7447  | 7248 | 3442 | 40    |
| H(14C) | 7694  | 7199 | 3305 | 40    |
| H(14D) | 5824  | 7788 | 3448 | 40    |
| H(22A) | 387   | 5421 | 5543 | 26    |

|        |      |      |      |    |
|--------|------|------|------|----|
| H(23A) | 2057 | 4889 | 6458 | 27 |
| H(32A) | 3519 | 5477 | 7824 | 47 |
| H(32B) | 4938 | 4801 | 8051 | 47 |
| H(32C) | 2979 | 4713 | 7518 | 47 |
| H(33A) | 8934 | 5638 | 7060 | 43 |
| H(33B) | 8407 | 5320 | 7781 | 43 |
| H(33C) | 7276 | 6047 | 7549 | 43 |
| H(34A) | 5430 | 4165 | 6690 | 52 |
| H(34B) | 7477 | 4201 | 7198 | 52 |
| H(34C) | 7703 | 4540 | 6472 | 52 |
| H(25A) | 6937 | 6355 | 6423 | 29 |
| H(26A) | 5223 | 6910 | 5526 | 30 |

---

Table 2, entry 9:

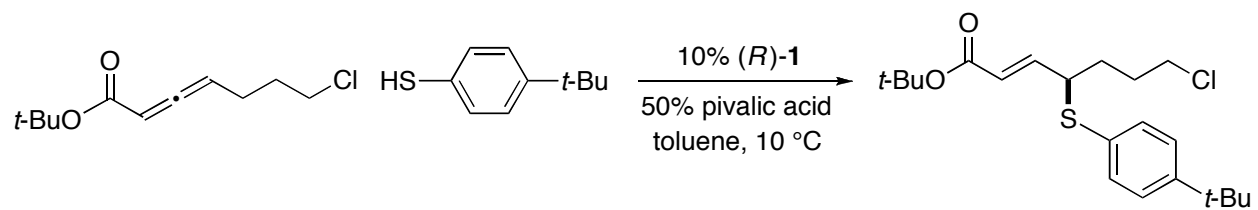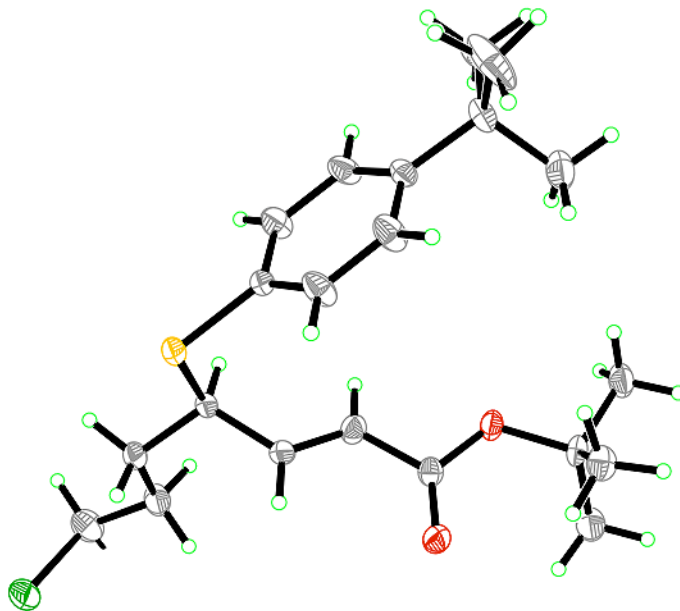

Table 1. Crystal data and structure refinement for yf1.

|                                   |                                                     |                 |
|-----------------------------------|-----------------------------------------------------|-----------------|
| Identification code               | yf1                                                 |                 |
| Empirical formula                 | C <sub>21</sub> H <sub>31</sub> Cl O <sub>2</sub> S |                 |
| Formula weight                    | 383.00                                              |                 |
| Temperature                       | 100(2) K                                            |                 |
| Wavelength                        | 0.71073 Å                                           |                 |
| Crystal system                    | Monoclinic                                          |                 |
| Space group                       | P21                                                 |                 |
| Unit cell dimensions              | a = 5.8536(7) Å                                     | α = 90°.        |
|                                   | b = 21.778(2) Å                                     | β = 99.580(2)°. |
|                                   | c = 17.441(2) Å                                     | γ = 90°.        |
| Volume                            | 2192.4(4) Å <sup>3</sup>                            |                 |
| Z                                 | 4                                                   |                 |
| Density (calculated)              | 1.179 Mg/m <sup>3</sup>                             |                 |
| Absorption coefficient            | 0.281 mm <sup>-1</sup>                              |                 |
| F(000)                            | 848                                                 |                 |
| Crystal size                      | 0.40 x 0.25 x 0.15 mm <sup>3</sup>                  |                 |
| Theta range for data collection   | 1.18 to 29.57°.                                     |                 |
| Index ranges                      | -8 ≤ h ≤ 8, -30 ≤ k ≤ 30, -24 ≤ l ≤ 24              |                 |
| Reflections collected             | 58806                                               |                 |
| Independent reflections           | 12186 [R(int) = 0.0482]                             |                 |
| Completeness to theta = 29.57°    | 99.6 %                                              |                 |
| Absorption correction             | Semi-empirical from equivalents                     |                 |
| Max. and min. transmission        | 0.9591 and 0.8959                                   |                 |
| Refinement method                 | Full-matrix least-squares on F <sup>2</sup>         |                 |
| Data / restraints / parameters    | 12186 / 385 / 464                                   |                 |
| Goodness-of-fit on F <sup>2</sup> | 1.010                                               |                 |
| Final R indices [I > 2σ(I)]       | R1 = 0.0351, wR2 = 0.0773                           |                 |
| R indices (all data)              | R1 = 0.0387, wR2 = 0.0796                           |                 |
| Absolute structure parameter      | -0.04(4)                                            |                 |
| Largest diff. peak and hole       | 0.244 and -0.171 e.Å <sup>-3</sup>                  |                 |

Table 2. Atomic coordinates ( $\times 10^4$ ) and equivalent isotropic displacement parameters ( $\text{\AA}^2 \times 10^3$ ) for yfl.  $U(\text{eq})$  is defined as one third of the trace of the orthogonalized  $U^{ij}$  tensor.

|       | x        | y        | z       | U(eq) |
|-------|----------|----------|---------|-------|
| S(1)  | 5513(1)  | 9620(1)  | 5612(1) | 21(1) |
| Cl(1) | 5227(1)  | 7822(1)  | 7985(1) | 35(1) |
| O(1)  | -1880(3) | 8656(1)  | 3462(1) | 22(1) |
| O(2)  | 902(3)   | 7931(1)  | 3818(1) | 27(1) |
| C(1)  | 3114(4)  | 9135(1)  | 5832(1) | 19(1) |
| C(2)  | 2418(4)  | 8710(1)  | 5158(1) | 20(1) |
| C(3)  | 468(4)   | 8781(1)  | 4654(1) | 23(1) |
| C(4)  | -113(4)  | 8396(1)  | 3944(1) | 20(1) |
| C(5)  | 3948(4)  | 8814(1)  | 6612(1) | 22(1) |
| C(6)  | 2116(4)  | 8383(1)  | 6830(1) | 28(1) |
| C(7)  | 2515(5)  | 8218(1)  | 7695(1) | 32(1) |
| C(8)  | 4064(4)  | 10024(1) | 4787(1) | 19(1) |
| C(9)  | 2289(5)  | 10431(1) | 4861(1) | 27(1) |
| C(10) | 1137(4)  | 10749(1) | 4215(1) | 27(1) |
| C(11) | 1718(4)  | 10666(1) | 3482(1) | 20(1) |
| C(12) | 3515(5)  | 10263(1) | 3422(1) | 29(1) |
| C(13) | 4676(5)  | 9942(1)  | 4057(1) | 28(1) |
| C(14) | 419(4)   | 10996(1) | 2757(1) | 24(1) |
| C(15) | -1325(5) | 11475(1) | 2967(2) | 37(1) |
| C(16) | -939(6)  | 10520(1) | 2222(1) | 41(1) |
| C(17) | 2153(5)  | 11341(2) | 2348(2) | 56(1) |
| C(18) | -2773(4) | 8385(1)  | 2693(1) | 20(1) |
| C(19) | -846(4)  | 8362(1)  | 2201(1) | 26(1) |
| C(20) | -3840(5) | 7761(1)  | 2797(1) | 30(1) |
| C(21) | -4627(5) | 8839(1)  | 2349(1) | 29(1) |
| S(2)  | 8896(1)  | 5615(1)  | 3111(1) | 21(1) |
| Cl(2) | 16990(1) | 7413(1)  | 5357(1) | 37(1) |
| O(3)  | 13943(3) | 6515(1)  | 845(1)  | 19(1) |
| O(4)  | 11537(3) | 7221(1)  | 1251(1) | 22(1) |
| C(31) | 11695(4) | 6034(1)  | 3294(1) | 18(1) |
| C(32) | 11709(4) | 6465(1)  | 2630(1) | 18(1) |



|       |          |         |         |       |
|-------|----------|---------|---------|-------|
| C(33) | 12765(4) | 6336(1) | 2033(1) | 18(1) |
| C(34) | 12624(4) | 6749(1) | 1348(1) | 18(1) |
| C(35) | 11892(4) | 6341(1) | 4091(1) | 20(1) |
| C(36) | 14145(4) | 6707(1) | 4298(1) | 22(1) |
| C(37) | 14432(4) | 6941(1) | 5124(1) | 27(1) |
| C(38) | 9270(4)  | 5202(1) | 2264(1) | 18(1) |
| C(39) | 8151(4)  | 5387(1) | 1536(1) | 21(1) |
| C(40) | 8522(4)  | 5072(1) | 868(1)  | 22(1) |
| C(41) | 10038(4) | 4577(1) | 912(1)  | 20(1) |
| C(42) | 11158(4) | 4397(1) | 1652(1) | 26(1) |
| C(43) | 10775(4) | 4703(1) | 2318(1) | 25(1) |
| C(44) | 10471(4) | 4228(1) | 184(1)  | 26(1) |
| C(45) | 9686(5)  | 3561(1) | 234(2)  | 32(1) |
| C(46) | 13070(5) | 4239(1) | 146(2)  | 43(1) |
| C(47) | 9129(6)  | 4506(1) | -565(1) | 38(1) |
| C(48) | 14211(4) | 6850(1) | 132(1)  | 19(1) |
| C(49) | 15451(4) | 7456(1) | 343(1)  | 24(1) |
| C(50) | 11870(4) | 6924(1) | -396(1) | 24(1) |
| C(51) | 15751(4) | 6420(1) | -250(1) | 26(1) |

---

Table 3. Bond lengths [Å] and angles [°] for yfl.

---

|             |          |
|-------------|----------|
| S(1)-C(8)   | 1.778(2) |
| S(1)-C(1)   | 1.848(2) |
| Cl(1)-C(7)  | 1.803(3) |
| O(1)-C(4)   | 1.344(3) |
| O(1)-C(18)  | 1.480(2) |
| O(2)-C(4)   | 1.212(3) |
| C(1)-C(2)   | 1.497(3) |
| C(1)-C(5)   | 1.535(3) |
| C(2)-C(3)   | 1.329(3) |
| C(3)-C(4)   | 1.487(3) |
| C(5)-C(6)   | 1.521(3) |
| C(6)-C(7)   | 1.531(3) |
| C(8)-C(9)   | 1.388(3) |
| C(8)-C(13)  | 1.389(3) |
| C(9)-C(10)  | 1.396(3) |
| C(10)-C(11) | 1.387(3) |
| C(11)-C(12) | 1.387(3) |
| C(11)-C(14) | 1.542(3) |
| C(12)-C(13) | 1.388(3) |
| C(14)-C(16) | 1.527(3) |
| C(14)-C(17) | 1.531(4) |
| C(14)-C(15) | 1.545(3) |
| C(18)-C(21) | 1.517(3) |
| C(18)-C(20) | 1.518(3) |
| C(18)-C(19) | 1.527(3) |
| S(2)-C(38)  | 1.774(2) |
| S(2)-C(31)  | 1.856(2) |
| Cl(2)-C(37) | 1.807(3) |
| O(3)-C(34)  | 1.360(2) |
| O(3)-C(48)  | 1.472(2) |
| O(4)-C(34)  | 1.206(2) |
| C(31)-C(32) | 1.492(3) |
| C(31)-C(35) | 1.530(3) |
| C(32)-C(33) | 1.327(3) |

|             |          |
|-------------|----------|
| C(33)-C(34) | 1.488(3) |
| C(35)-C(36) | 1.532(3) |
| C(36)-C(37) | 1.510(3) |
| C(38)-C(39) | 1.389(3) |
| C(38)-C(43) | 1.392(3) |
| C(39)-C(40) | 1.399(3) |
| C(40)-C(41) | 1.389(3) |
| C(41)-C(42) | 1.403(3) |
| C(41)-C(44) | 1.536(3) |
| C(42)-C(43) | 1.390(3) |
| C(44)-C(45) | 1.530(3) |
| C(44)-C(47) | 1.533(4) |
| C(44)-C(46) | 1.534(4) |
| C(48)-C(49) | 1.519(3) |
| C(48)-C(50) | 1.527(3) |
| C(48)-C(51) | 1.529(3) |

|                   |            |
|-------------------|------------|
| C(8)-S(1)-C(1)    | 100.04(10) |
| C(4)-O(1)-C(18)   | 121.12(16) |
| C(2)-C(1)-C(5)    | 114.84(16) |
| C(2)-C(1)-S(1)    | 107.92(15) |
| C(5)-C(1)-S(1)    | 107.64(15) |
| C(3)-C(2)-C(1)    | 122.61(19) |
| C(2)-C(3)-C(4)    | 122.53(19) |
| O(2)-C(4)-O(1)    | 126.09(19) |
| O(2)-C(4)-C(3)    | 124.7(2)   |
| O(1)-C(4)-C(3)    | 109.16(17) |
| C(6)-C(5)-C(1)    | 111.64(19) |
| C(5)-C(6)-C(7)    | 113.1(2)   |
| C(6)-C(7)-Cl(1)   | 111.80(19) |
| C(9)-C(8)-C(13)   | 118.58(19) |
| C(9)-C(8)-S(1)    | 120.30(16) |
| C(13)-C(8)-S(1)   | 121.11(17) |
| C(8)-C(9)-C(10)   | 120.6(2)   |
| C(11)-C(10)-C(9)  | 121.3(2)   |
| C(12)-C(11)-C(10) | 117.20(19) |

|                   |            |
|-------------------|------------|
| C(12)-C(11)-C(14) | 120.66(19) |
| C(10)-C(11)-C(14) | 122.14(19) |
| C(11)-C(12)-C(13) | 122.3(2)   |
| C(12)-C(13)-C(8)  | 119.9(2)   |
| C(16)-C(14)-C(17) | 111.5(2)   |
| C(16)-C(14)-C(11) | 108.61(18) |
| C(17)-C(14)-C(11) | 109.67(19) |
| C(16)-C(14)-C(15) | 107.8(2)   |
| C(17)-C(14)-C(15) | 107.2(2)   |
| C(11)-C(14)-C(15) | 112.06(18) |
| O(1)-C(18)-C(21)  | 102.66(16) |
| O(1)-C(18)-C(20)  | 109.83(17) |
| C(21)-C(18)-C(20) | 110.47(19) |
| O(1)-C(18)-C(19)  | 109.86(17) |
| C(21)-C(18)-C(19) | 110.21(18) |
| C(20)-C(18)-C(19) | 113.29(18) |
| C(38)-S(2)-C(31)  | 99.46(10)  |
| C(34)-O(3)-C(48)  | 120.71(15) |
| C(32)-C(31)-C(35) | 114.87(16) |
| C(32)-C(31)-S(2)  | 107.14(14) |
| C(35)-C(31)-S(2)  | 107.58(14) |
| C(33)-C(32)-C(31) | 122.59(18) |
| C(32)-C(33)-C(34) | 122.11(18) |
| O(4)-C(34)-O(3)   | 124.89(18) |
| O(4)-C(34)-C(33)  | 125.80(19) |
| O(3)-C(34)-C(33)  | 109.31(16) |
| C(31)-C(35)-C(36) | 111.97(17) |
| C(37)-C(36)-C(35) | 110.80(18) |
| C(36)-C(37)-Cl(2) | 111.25(17) |
| C(39)-C(38)-C(43) | 118.97(18) |
| C(39)-C(38)-S(2)  | 120.68(15) |
| C(43)-C(38)-S(2)  | 120.30(16) |
| C(38)-C(39)-C(40) | 120.31(19) |
| C(41)-C(40)-C(39) | 121.37(19) |
| C(40)-C(41)-C(42) | 117.65(18) |
| C(40)-C(41)-C(44) | 122.03(19) |

|                   |            |
|-------------------|------------|
| C(42)-C(41)-C(44) | 120.31(19) |
| C(43)-C(42)-C(41) | 121.2(2)   |
| C(42)-C(43)-C(38) | 120.47(19) |
| C(45)-C(44)-C(47) | 107.9(2)   |
| C(45)-C(44)-C(46) | 109.1(2)   |
| C(47)-C(44)-C(46) | 109.1(2)   |
| C(45)-C(44)-C(41) | 109.35(19) |
| C(47)-C(44)-C(41) | 112.10(18) |
| C(46)-C(44)-C(41) | 109.23(19) |
| O(3)-C(48)-C(49)  | 109.88(16) |
| O(3)-C(48)-C(50)  | 110.50(17) |
| C(49)-C(48)-C(50) | 113.49(17) |
| O(3)-C(48)-C(51)  | 102.56(15) |
| C(49)-C(48)-C(51) | 110.18(18) |
| C(50)-C(48)-C(51) | 109.68(18) |

---

Symmetry transformations used to generate equivalent atoms:

Table 4. Anisotropic displacement parameters ( $\text{\AA}^2 \times 10^3$ ) for yf1. The anisotropic displacement factor exponent takes the form:  $-2\pi^2 [ h^2 a^{*2} U^{11} + \dots + 2 h k a^* b^* U^{12} ]$

|       | U <sup>11</sup> | U <sup>22</sup> | U <sup>33</sup> | U <sup>23</sup> | U <sup>13</sup> | U <sup>12</sup> |
|-------|-----------------|-----------------|-----------------|-----------------|-----------------|-----------------|
| S(1)  | 24(1)           | 22(1)           | 17(1)           | 3(1)            | -2(1)           | 0(1)            |
| Cl(1) | 43(1)           | 28(1)           | 30(1)           | 9(1)            | -2(1)           | -2(1)           |
| O(1)  | 22(1)           | 27(1)           | 17(1)           | -5(1)           | -1(1)           | 2(1)            |
| O(2)  | 28(1)           | 25(1)           | 25(1)           | -6(1)           | -2(1)           | 6(1)            |
| C(1)  | 22(1)           | 18(1)           | 15(1)           | 0(1)            | -1(1)           | 2(1)            |
| C(2)  | 24(1)           | 17(1)           | 18(1)           | 0(1)            | 2(1)            | 2(1)            |
| C(3)  | 23(1)           | 26(1)           | 20(1)           | -6(1)           | 2(1)            | 3(1)            |
| C(4)  | 18(1)           | 24(1)           | 18(1)           | -1(1)           | 3(1)            | 0(1)            |
| C(5)  | 28(1)           | 22(1)           | 16(1)           | 3(1)            | -1(1)           | -1(1)           |
| C(6)  | 27(1)           | 31(1)           | 24(1)           | 5(1)            | -1(1)           | -5(1)           |
| C(7)  | 33(1)           | 36(1)           | 28(1)           | 8(1)            | 8(1)            | 2(1)            |
| C(8)  | 24(1)           | 17(1)           | 16(1)           | 1(1)            | 0(1)            | -1(1)           |
| C(9)  | 36(1)           | 29(1)           | 18(1)           | 2(1)            | 9(1)            | 12(1)           |
| C(10) | 32(1)           | 24(1)           | 24(1)           | 4(1)            | 8(1)            | 12(1)           |
| C(11) | 21(1)           | 21(1)           | 19(1)           | 5(1)            | 2(1)            | 0(1)            |
| C(12) | 34(1)           | 38(1)           | 18(1)           | 5(1)            | 10(1)           | 13(1)           |
| C(13) | 28(1)           | 34(1)           | 22(1)           | 6(1)            | 8(1)            | 15(1)           |
| C(14) | 20(1)           | 33(1)           | 19(1)           | 7(1)            | 1(1)            | 2(1)            |
| C(15) | 40(2)           | 35(1)           | 32(1)           | 6(1)            | -2(1)           | 12(1)           |
| C(16) | 47(2)           | 43(1)           | 27(1)           | -4(1)           | -10(1)          | 9(1)            |
| C(17) | 28(1)           | 89(2)           | 50(2)           | 48(2)           | 5(1)            | 0(1)            |
| C(18) | 19(1)           | 27(1)           | 13(1)           | -3(1)           | 2(1)            | -5(1)           |
| C(19) | 27(1)           | 32(1)           | 21(1)           | 1(1)            | 9(1)            | -3(1)           |
| C(20) | 31(1)           | 30(1)           | 26(1)           | 4(1)            | 1(1)            | -10(1)          |
| C(21) | 27(1)           | 35(1)           | 23(1)           | 0(1)            | -5(1)           | -1(1)           |
| S(2)  | 24(1)           | 25(1)           | 16(1)           | -2(1)           | 8(1)            | -4(1)           |
| Cl(2) | 34(1)           | 29(1)           | 43(1)           | -5(1)           | -6(1)           | -5(1)           |
| O(3)  | 22(1)           | 22(1)           | 15(1)           | 3(1)            | 9(1)            | 3(1)            |
| O(4)  | 26(1)           | 23(1)           | 20(1)           | 2(1)            | 9(1)            | 6(1)            |
| C(31) | 21(1)           | 18(1)           | 15(1)           | 0(1)            | 5(1)            | -3(1)           |
| C(32) | 21(1)           | 16(1)           | 18(1)           | 2(1)            | 4(1)            | -1(1)           |

|       |       |       |       |        |       |        |
|-------|-------|-------|-------|--------|-------|--------|
| C(33) | 20(1) | 18(1) | 17(1) | 4(1)   | 6(1)  | 0(1)   |
| C(34) | 20(1) | 19(1) | 14(1) | 1(1)   | 2(1)  | -3(1)  |
| C(35) | 28(1) | 20(1) | 14(1) | 0(1)   | 5(1)  | -2(1)  |
| C(36) | 25(1) | 24(1) | 17(1) | 2(1)   | 6(1)  | -4(1)  |
| C(37) | 32(1) | 26(1) | 23(1) | -2(1)  | 4(1)  | -4(1)  |
| C(38) | 21(1) | 17(1) | 18(1) | -2(1)  | 6(1)  | -3(1)  |
| C(39) | 20(1) | 23(1) | 20(1) | 0(1)   | 5(1)  | 3(1)   |
| C(40) | 20(1) | 27(1) | 17(1) | 1(1)   | 2(1)  | 2(1)   |
| C(41) | 20(1) | 19(1) | 21(1) | -4(1)  | 4(1)  | -3(1)  |
| C(42) | 30(1) | 19(1) | 29(1) | -4(1)  | 3(1)  | 6(1)   |
| C(43) | 30(1) | 23(1) | 18(1) | 0(1)   | -2(1) | 2(1)   |
| C(44) | 27(1) | 29(1) | 22(1) | -7(1)  | 8(1)  | 2(1)   |
| C(45) | 35(1) | 29(1) | 33(1) | -11(1) | 8(1)  | -3(1)  |
| C(46) | 30(1) | 53(2) | 50(2) | -25(1) | 18(1) | -10(1) |
| C(47) | 48(2) | 43(1) | 22(1) | -3(1)  | 9(1)  | 6(1)   |
| C(48) | 21(1) | 22(1) | 16(1) | 4(1)   | 8(1)  | 0(1)   |
| C(49) | 23(1) | 27(1) | 21(1) | 4(1)   | 4(1)  | -7(1)  |
| C(50) | 26(1) | 28(1) | 19(1) | 1(1)   | 3(1)  | -1(1)  |
| C(51) | 30(1) | 30(1) | 23(1) | 3(1)   | 15(1) | 6(1)   |

---

Table 5. Hydrogen coordinates ( $\times 10^4$ ) and isotropic displacement parameters ( $\text{\AA}^2 \times 10^{-3}$ ) for yfl.

|        | x     | y     | z    | U(eq) |
|--------|-------|-------|------|-------|
| H(1)   | 1768  | 9404  | 5886 | 22    |
| H(2)   | 3410  | 8377  | 5088 | 24    |
| H(3)   | -596  | 9090  | 4751 | 28    |
| H(5A)  | 5374  | 8578  | 6579 | 27    |
| H(5B)  | 4334  | 9128  | 7024 | 27    |
| H(6A)  | 2105  | 8001  | 6522 | 33    |
| H(6B)  | 575   | 8578  | 6691 | 33    |
| H(7A)  | 1230  | 7954  | 7805 | 38    |
| H(7B)  | 2509  | 8599  | 8006 | 38    |
| H(9)   | 1853  | 10494 | 5356 | 33    |
| H(10)  | -67   | 11027 | 4278 | 32    |
| H(12)  | 3966  | 10204 | 2929 | 35    |
| H(13)  | 5888  | 9667  | 3993 | 33    |
| H(15A) | -2070 | 11685 | 2494 | 55    |
| H(15B) | -505  | 11777 | 3330 | 55    |
| H(15C) | -2505 | 11268 | 3211 | 55    |
| H(16A) | -1790 | 10725 | 1761 | 62    |
| H(16B) | -2035 | 10309 | 2500 | 62    |
| H(16C) | 137   | 10220 | 2062 | 62    |
| H(17A) | 3092  | 11045 | 2113 | 84    |
| H(17B) | 3165  | 11593 | 2727 | 84    |
| H(17C) | 1313  | 11606 | 1941 | 84    |
| H(19A) | -104  | 8766  | 2207 | 39    |
| H(19B) | -1505 | 8252  | 1665 | 39    |
| H(19C) | 307   | 8055  | 2416 | 39    |
| H(20A) | -2642 | 7482  | 3056 | 44    |
| H(20B) | -4506 | 7594  | 2287 | 44    |
| H(20C) | -5060 | 7805  | 3115 | 44    |
| H(21A) | -5736 | 8894  | 2707 | 44    |
| H(21B) | -5439 | 8683  | 1850 | 44    |



|        |       |      |       |    |
|--------|-------|------|-------|----|
| H(21C) | -3905 | 9235 | 2267  | 44 |
| H(31)  | 12991 | 5733 | 3306  | 21 |
| H(32)  | 10930 | 6848 | 2635  | 22 |
| H(33)  | 13640 | 5968 | 2044  | 22 |
| H(35A) | 11831 | 6023 | 4492  | 24 |
| H(35B) | 10557 | 6620 | 4092  | 24 |
| H(36A) | 15477 | 6442 | 4238  | 26 |
| H(36B) | 14124 | 7059 | 3938  | 26 |
| H(37A) | 14550 | 6588 | 5486  | 32 |
| H(37B) | 13050 | 7183 | 5193  | 32 |
| H(39)  | 7127  | 5728 | 1491  | 25 |
| H(40)  | 7722  | 5199 | 375   | 26 |
| H(42)  | 12197 | 4058 | 1699  | 31 |
| H(43)  | 11545 | 4571 | 2813  | 30 |
| H(45A) | 10612 | 3362 | 686   | 48 |
| H(45B) | 9897  | 3342 | -240  | 48 |
| H(45C) | 8046  | 3552 | 288   | 48 |
| H(46A) | 13583 | 4665 | 113   | 65 |
| H(46B) | 13355 | 4012 | -315  | 65 |
| H(46C) | 13932 | 4046 | 614   | 65 |
| H(47A) | 7465  | 4496 | -546  | 56 |
| H(47B) | 9443  | 4269 | -1013 | 56 |
| H(47C) | 9621  | 4933 | -614  | 56 |
| H(49A) | 14483 | 7719 | 612   | 36 |
| H(49B) | 15740 | 7660 | -132  | 36 |
| H(49C) | 16929 | 7377 | 684   | 36 |
| H(50A) | 11116 | 6523 | -481  | 37 |
| H(50B) | 12103 | 7097 | -896  | 37 |
| H(50C) | 10888 | 7201 | -149  | 37 |
| H(51A) | 17216 | 6354 | 104   | 40 |
| H(51B) | 16064 | 6604 | -734  | 40 |
| H(51C) | 14960 | 6026 | -364  | 40 |

---

VI. NMR Spectra

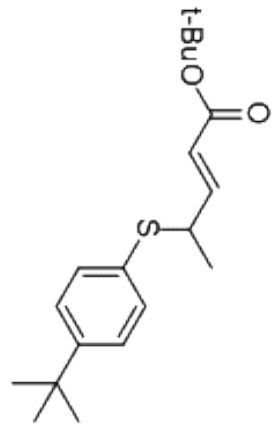

Table 2, entry 1

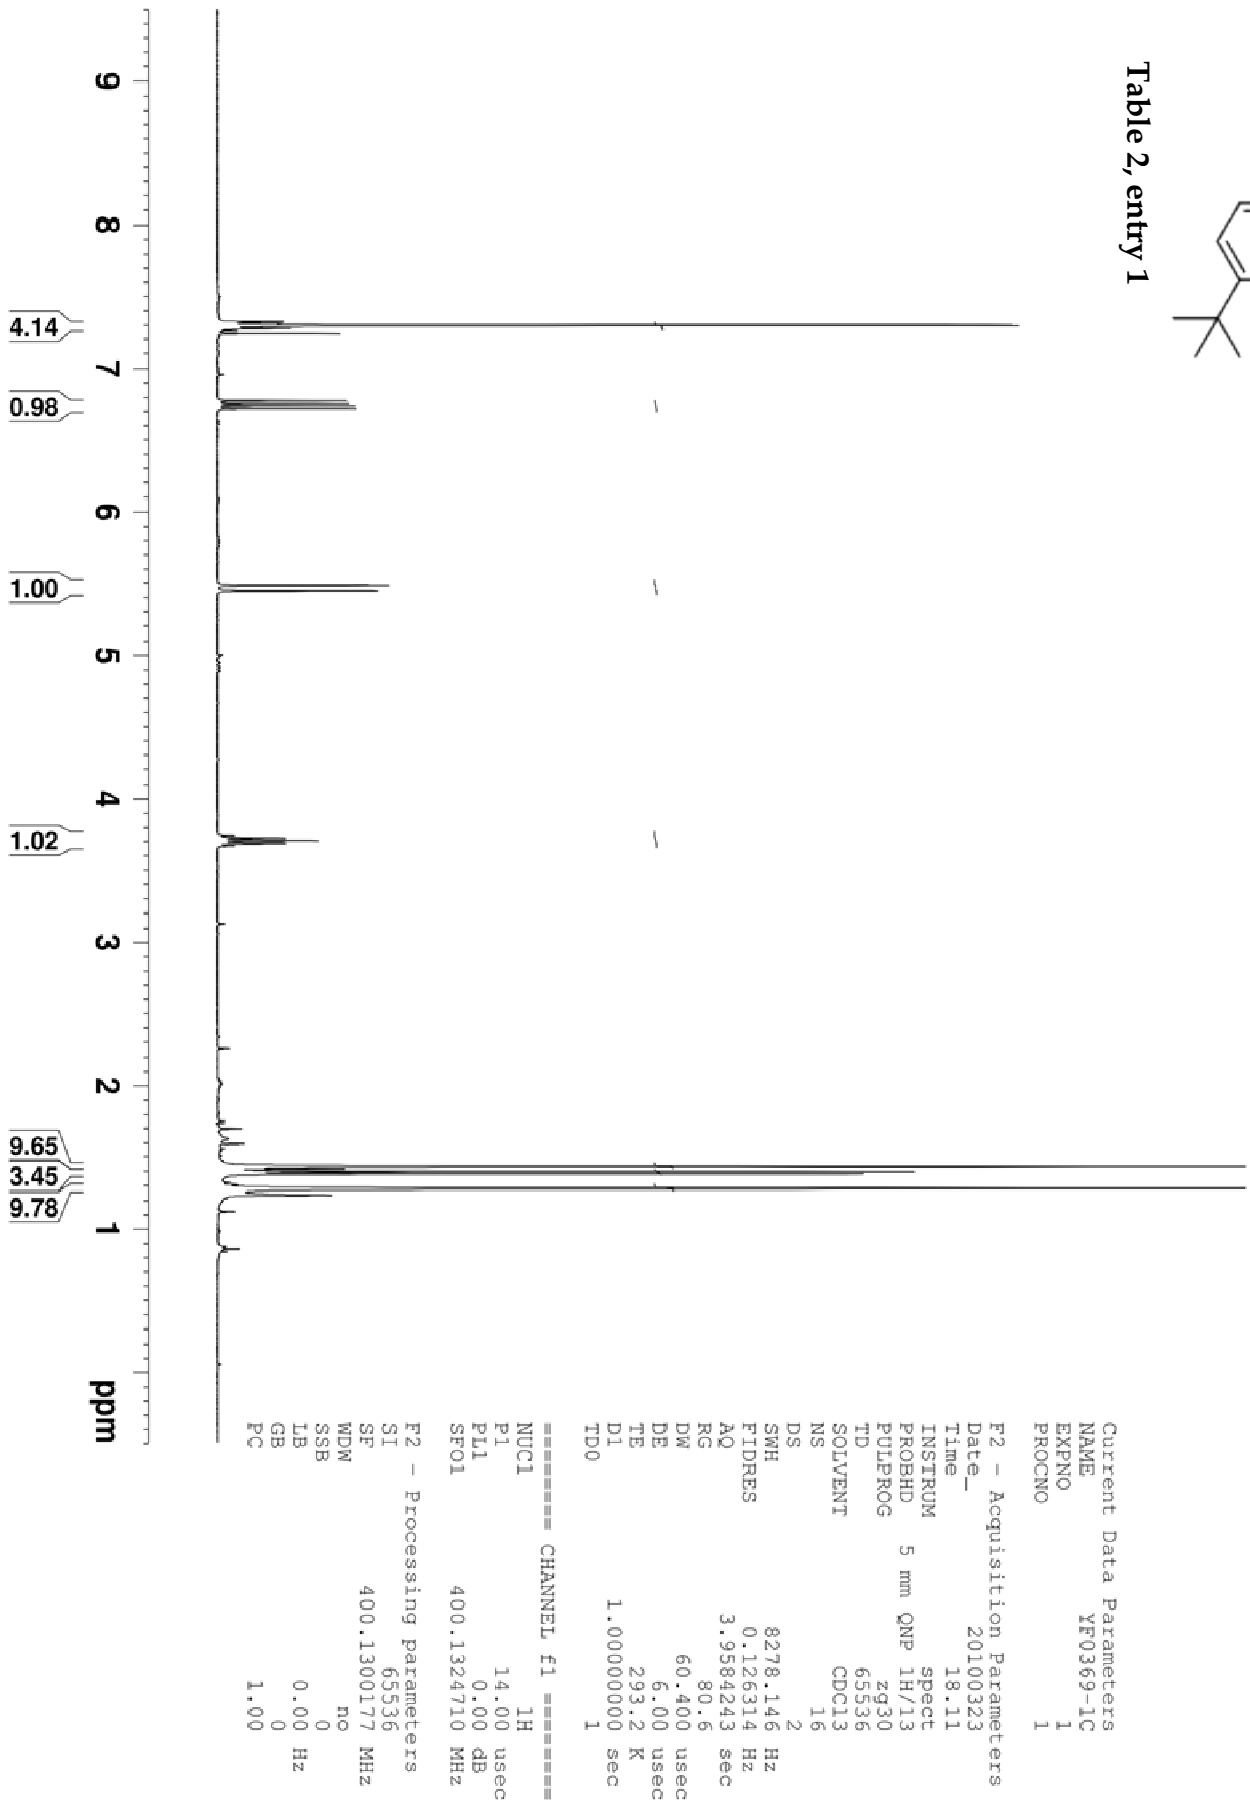

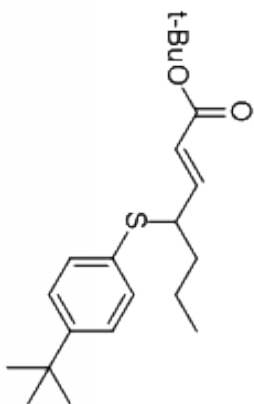

Table 2, entry 2

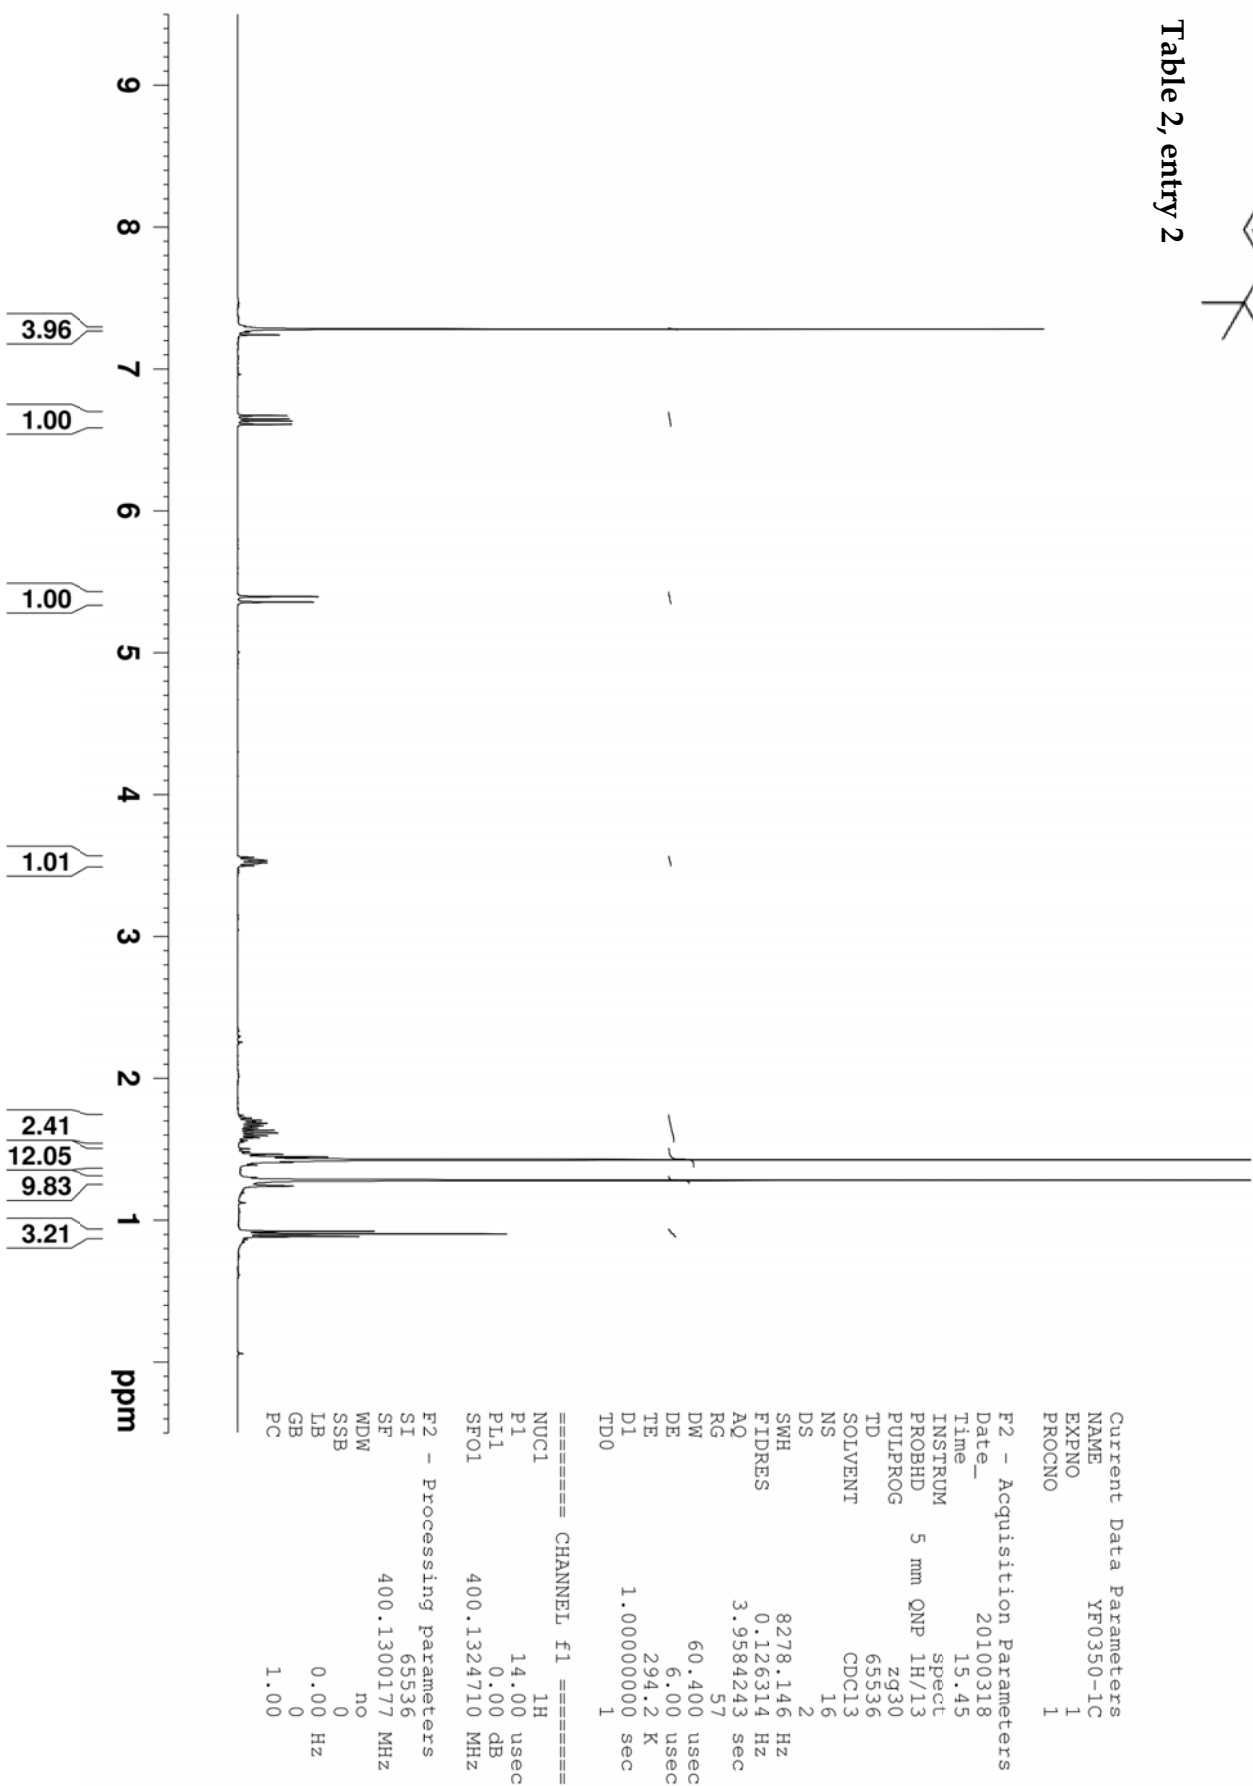

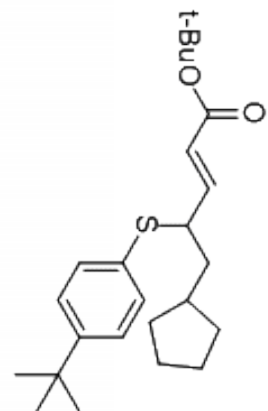

Table 2, entry 3

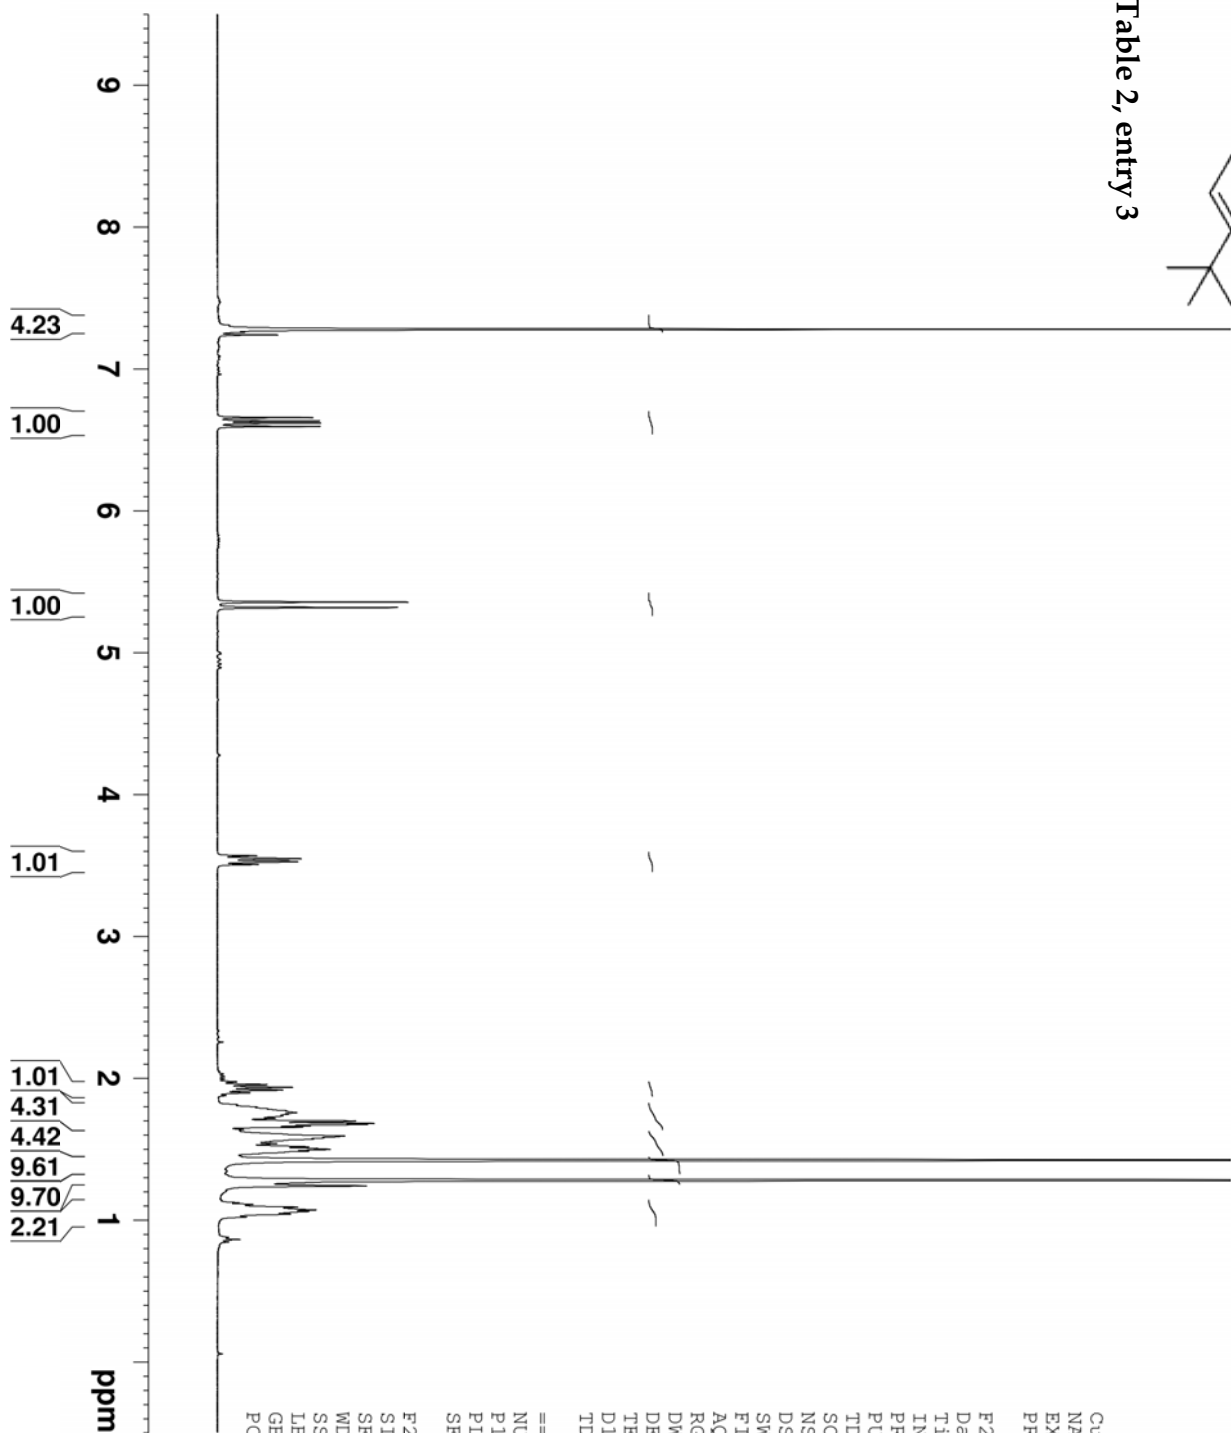

Current Data Parameters  
 NAME YF0372-1B  
 EXPNO 1  
 PROCNO 1

F2 - Acquisition Parameters  
 Date\_ 20100325  
 Time 12.34

INSTRUM spect  
 PROBHD 5 mm BBO BB-1H  
 PULPROG zg30  
 TD 65536  
 SOLVENT

NS 16  
 DS 2  
 SWH 8278.146 Hz  
 FIDRES 0.126314 Hz  
 AQ 3.9584243 sec

RG 40.3  
 DW 60.400 usec  
 DE 6.00 usec  
 TE 295.2 K  
 D1 1.00000000 sec  
 TD0 1

==== CHANNEL f1 =====  
 NUCL 1H  
 P1 15.07 usec  
 PL1 0.00 dB  
 SFO1 400.1324710 MHz

F2 - Processing parameters  
 SI 65536  
 SF 400.1300170 MHz  
 WDW no  
 SSB 0  
 LB 0.00 Hz  
 GB 0  
 PC 1.00

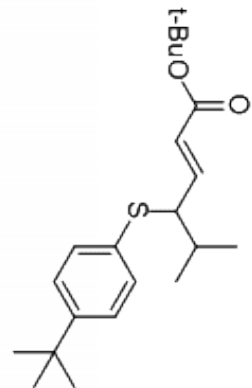

Table 2, entry 4

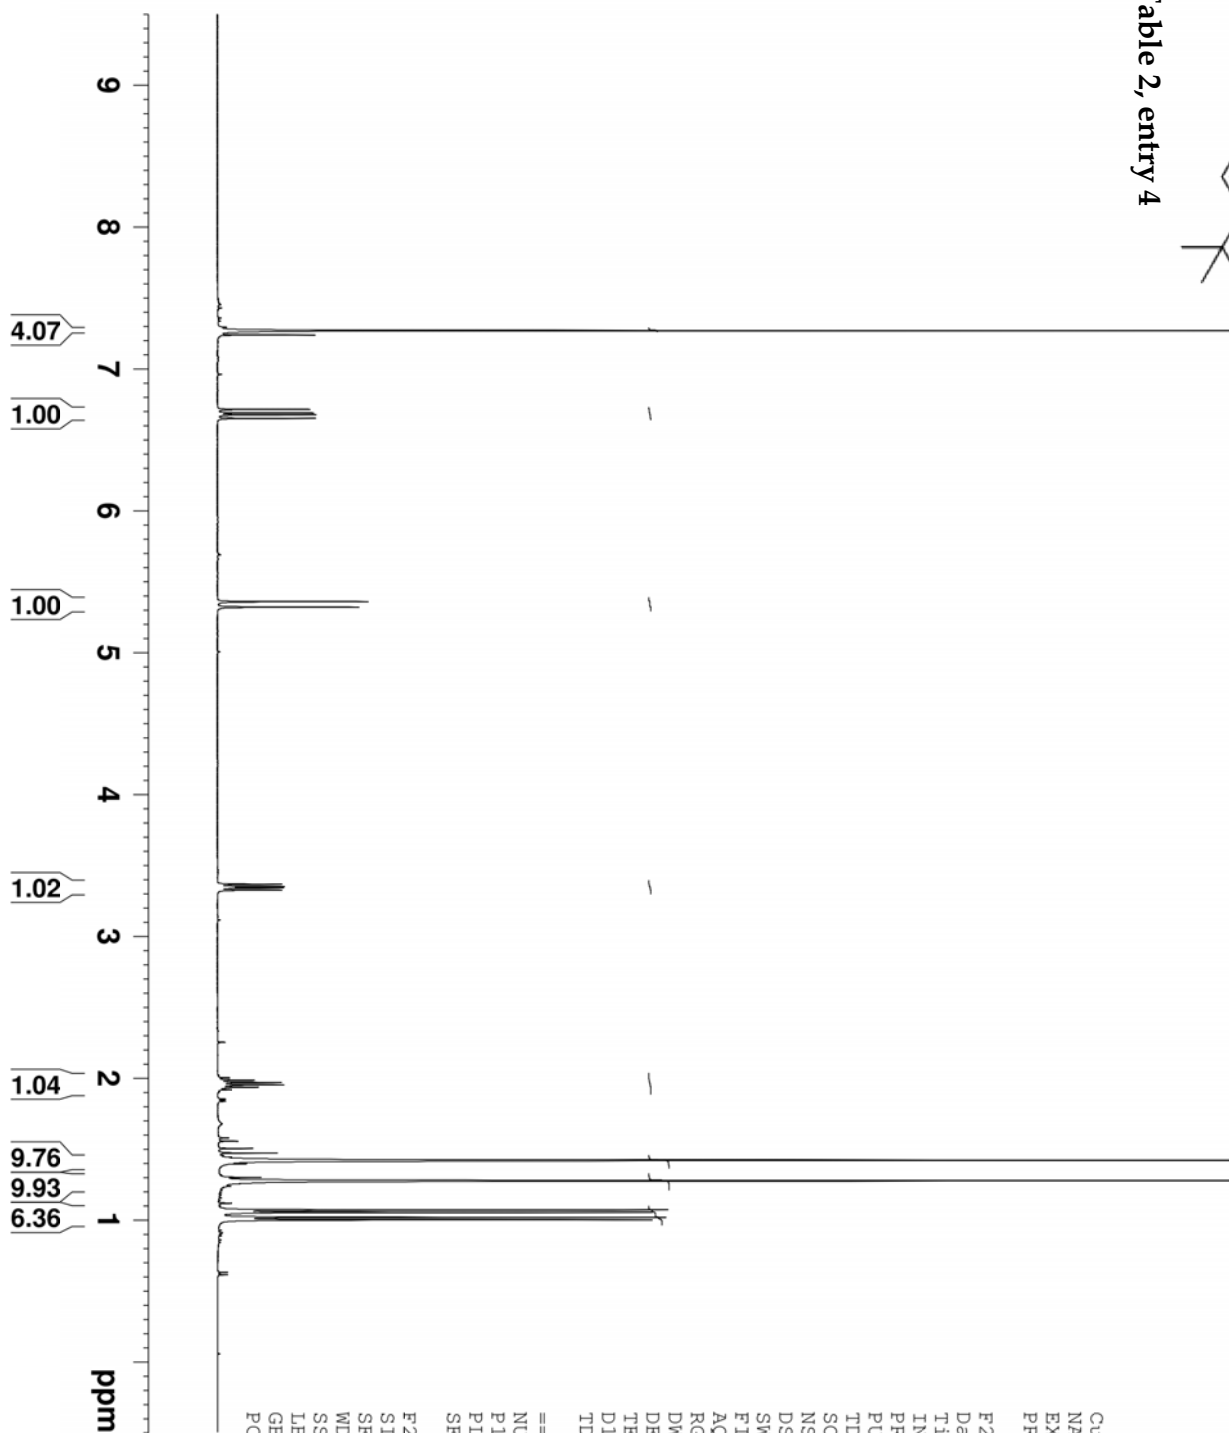

Current Data Parameters  
 NAME YF0371-1C  
 EXPNO 1  
 PROCNO 1

F2 - Acquisition Parameters

Date\_ 20100323  
 Time 12.50  
 INSTRUM spect  
 PROBHD 5 mm QNP 1H/13  
 PULPROG zg30  
 TD 65536  
 SOLVENT CDCl3  
 NS 16  
 DS 2  
 SWH 8278.146 Hz  
 FIDRES 0.126314 Hz  
 AQ 3.9584243 sec  
 RG 57  
 DW 60.400 usec  
 DE 6.00 usec  
 TE 293.2 K  
 D1 1.00000000 sec  
 TD0 1

==== CHANNEL f1 =====  
 NUCL 1H  
 P1 14.00 usec  
 PL1 0.00 dB  
 SFO1 400.1324710 MHz

F2 - Processing parameters  
 SI 65536  
 SF 400.1300176 MHz  
 WDW no  
 SSB 0  
 LB 0.00 Hz  
 GB 0  
 PC 1.00

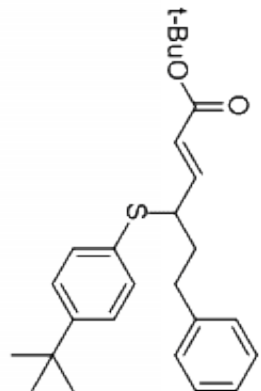

Table2, entry5

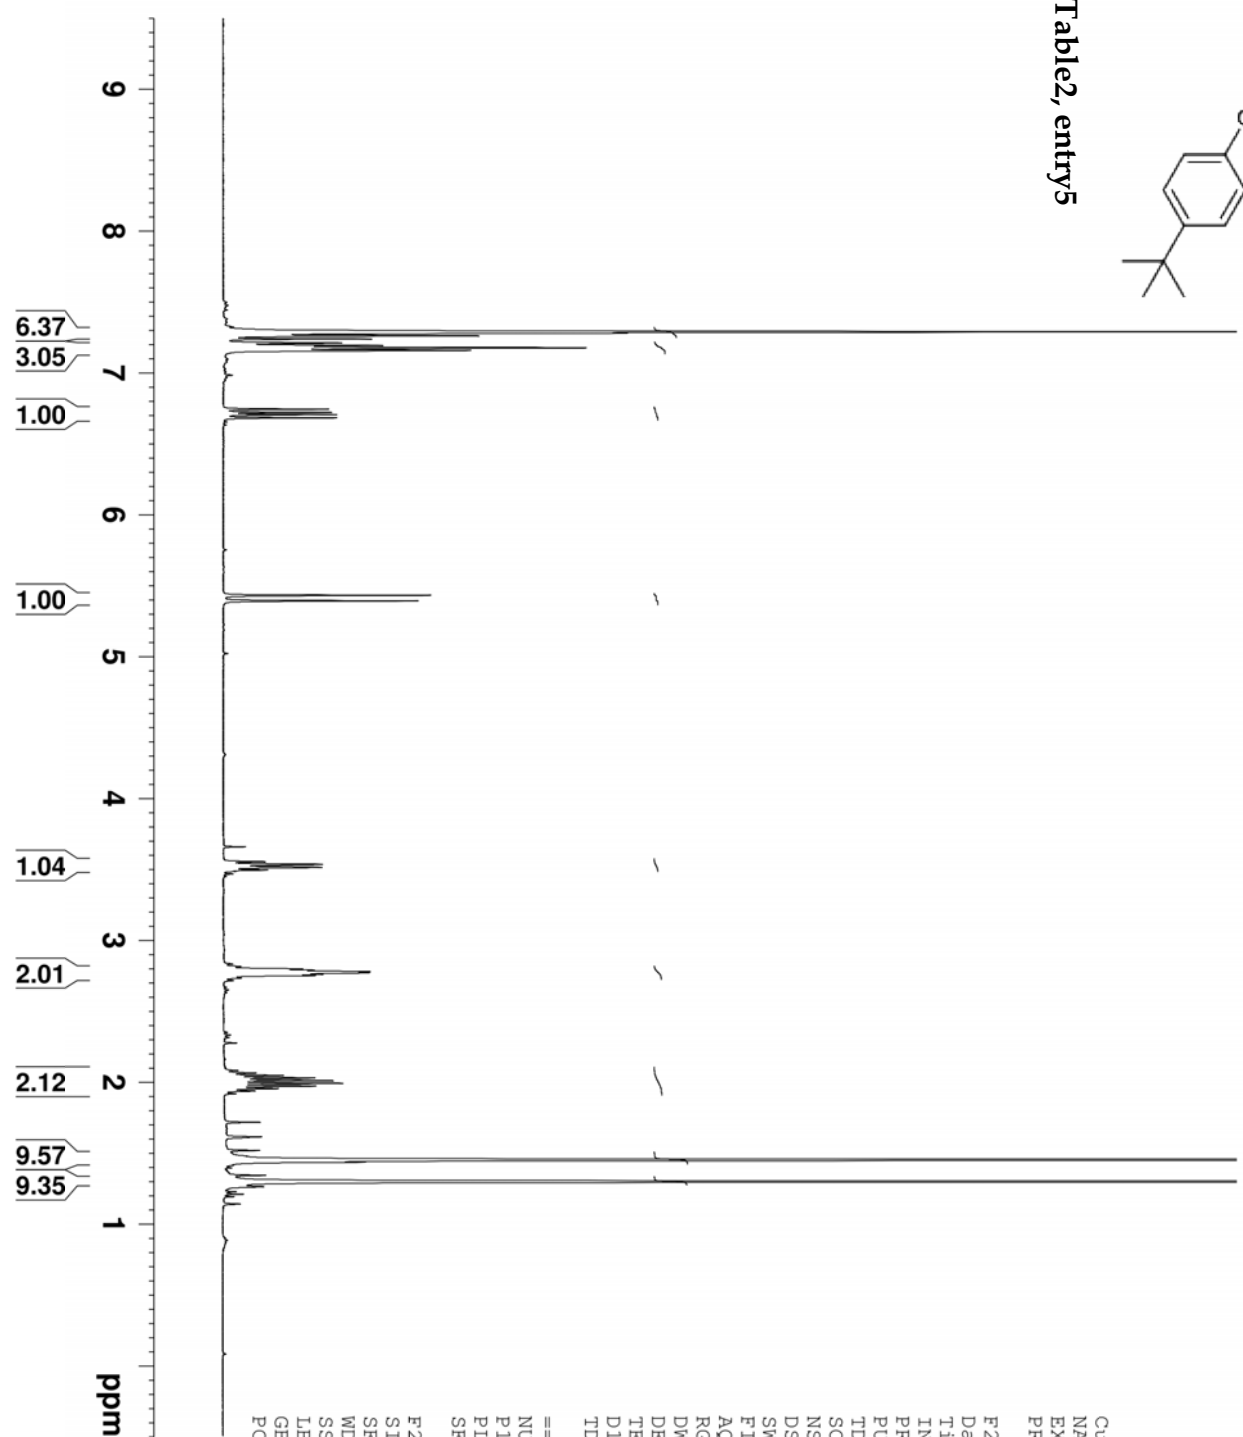

Current Data Parameters  
 NAME YF0376-1B  
 EXPNO 1  
 PROCNO 1

F2 - Acquisition Parameters  
 Date\_ 20100325  
 Time 12.24

INSTRUM spect  
 PROBHD 5 mm BBO BB-1H  
 PULPROG zg30  
 TD 65536  
 SOLVENT

NS 16  
 DS 2  
 SWH 8278.146 Hz  
 FIDRES 0.126314 Hz  
 AQ 3.9584243 sec

RG 40.3  
 DW 60.400 usec  
 DE 6.00 usec  
 TE 295.2 K  
 D1 1.00000000 sec  
 TD0 1

==== CHANNEL f1 =====  
 NUCL 1H  
 P1 15.07 usec  
 PL1 0.00 dB  
 SFO1 400.1324710 MHz

F2 - Processing parameters  
 SI 65536  
 SF 400.1300172 MHz  
 WDW no  
 SSB 0  
 LB 0.00 Hz  
 GB 0  
 PC 1.00

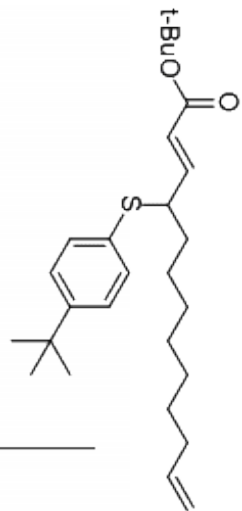

Table 2, entry 6

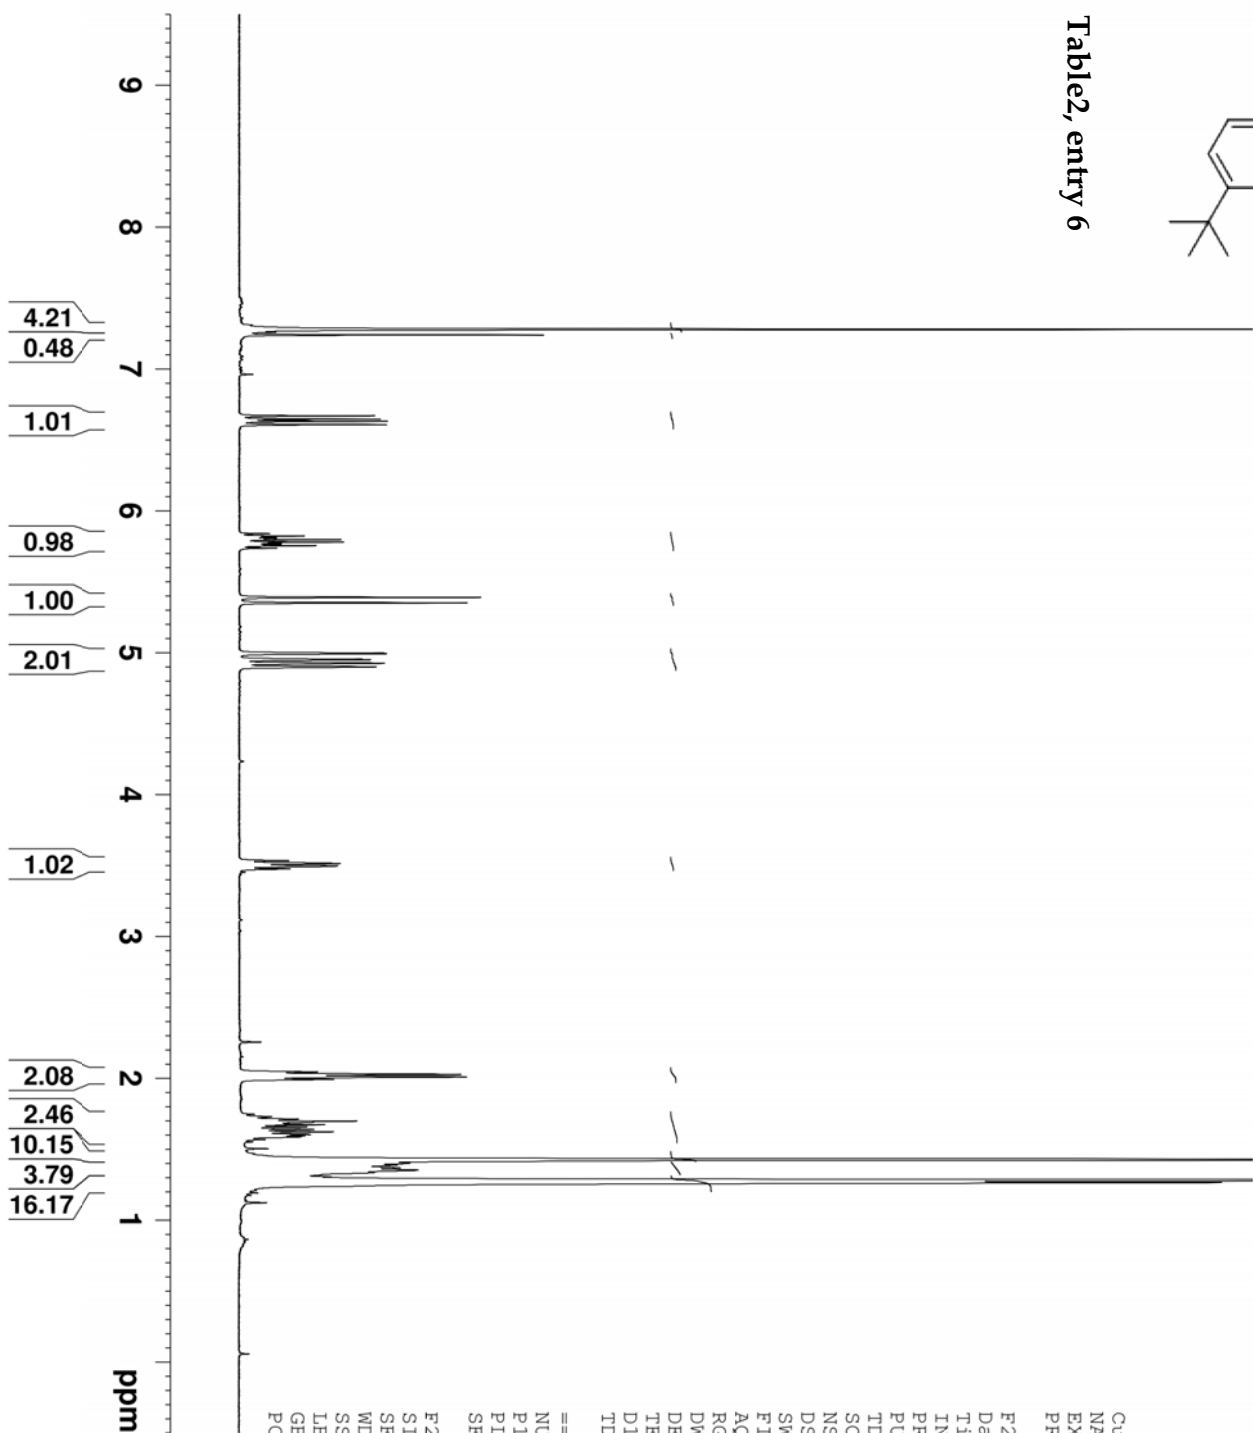

Current Data Parameters  
 NAME YF0375-1C  
 EXPNO 1  
 PROCNO 1

F2 - Acquisition Parameters  
 Date\_ 20100326  
 Time 17.31

INSTRUM spect  
 PROBHD 5 mm BBO BB-1H  
 PULPROG zg30  
 TD 65536  
 SOLVENT

NS 16  
 DS 2  
 SWH 8278.146 Hz  
 FIDRES 0.126314 Hz  
 AQ 3.9584243 sec

RG 50.8  
 DW 60.400 usec  
 DE 6.00 usec  
 TE 296.2 K  
 D1 1.00000000 sec  
 TD0 1

==== CHANNEL f1 =====  
 NUCL 1H  
 P1 15.07 usec  
 PL1 0.00 dB  
 SFO1 400.1324710 MHz

F2 - Processing Parameters  
 SI 65536  
 SF 400.1300172 MHz  
 WDW no  
 SSB 0  
 LB 0.00 Hz  
 GB 0  
 PC 1.00

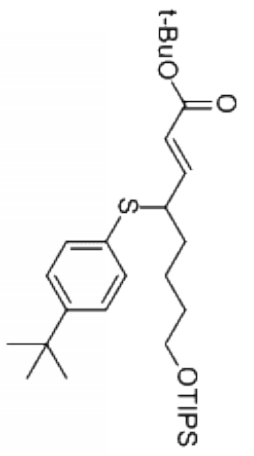

Table 2, entry 7

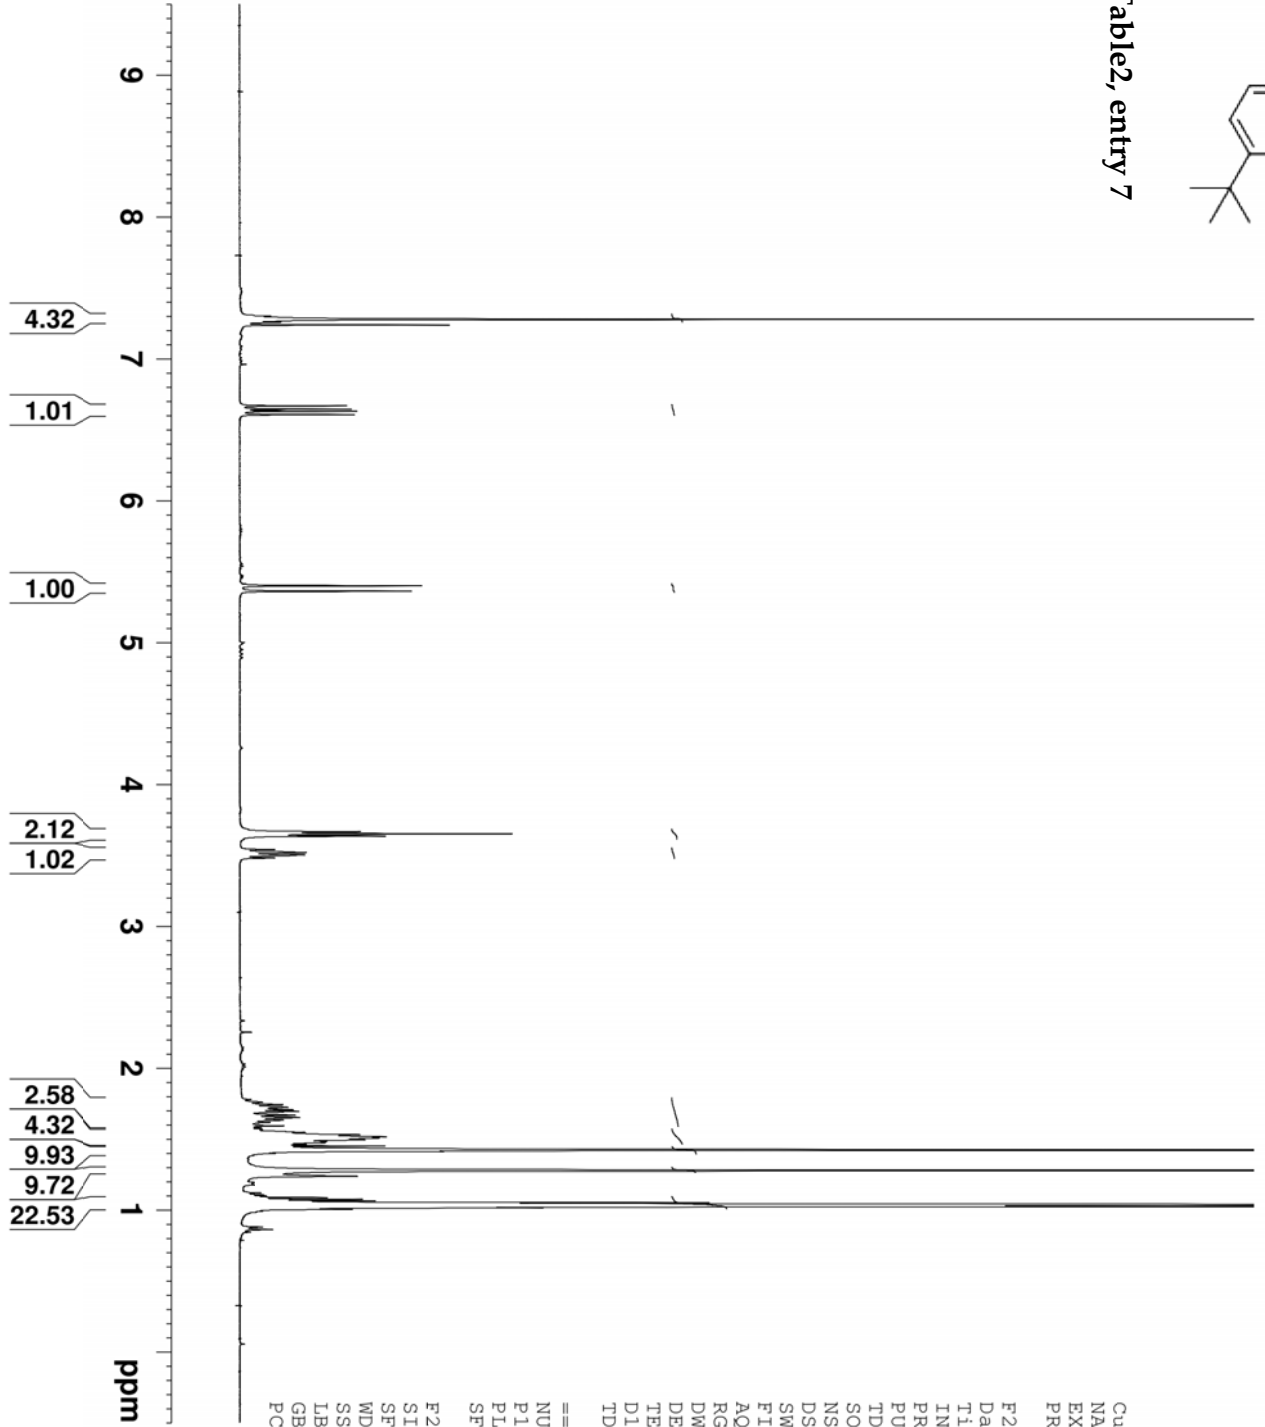

Current Data Parameters  
 NAME YF0378-1B  
 EXPNO 1  
 PROCNO 1

F2 - Acquisition Parameters  
 Date\_ 20100325  
 Time 18.52  
 INSTRUM spect  
 PROBHD 5 mm QNP 1H/13  
 PULPROG zg30  
 TD 65536  
 SOLVENT CDCl3  
 NS 16  
 DS 2  
 SWH 8278.146 Hz  
 FIDRES 0.126314 Hz  
 AQ 3.9584243 sec  
 RG 57  
 DW 60.400 usec  
 DE 6.00 usec  
 TE 293.2 K  
 D1 1.00000000 sec  
 TD0 1

==== CHANNEL f1 =====  
 NUC1 1H  
 P1 14.00 usec  
 PL1 0.00 dB  
 SFO1 400.1324710 MHz  
 F2 - Processing parameters  
 SI 65536  
 SF 400.1300178 MHz  
 WDW no  
 SSB 0  
 LB 0.00 Hz  
 GB 0  
 PC 1.00



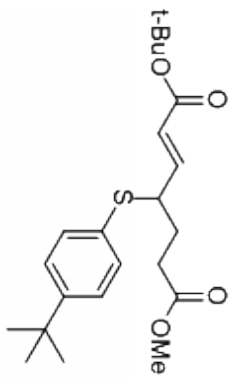

Table 2, entry 8

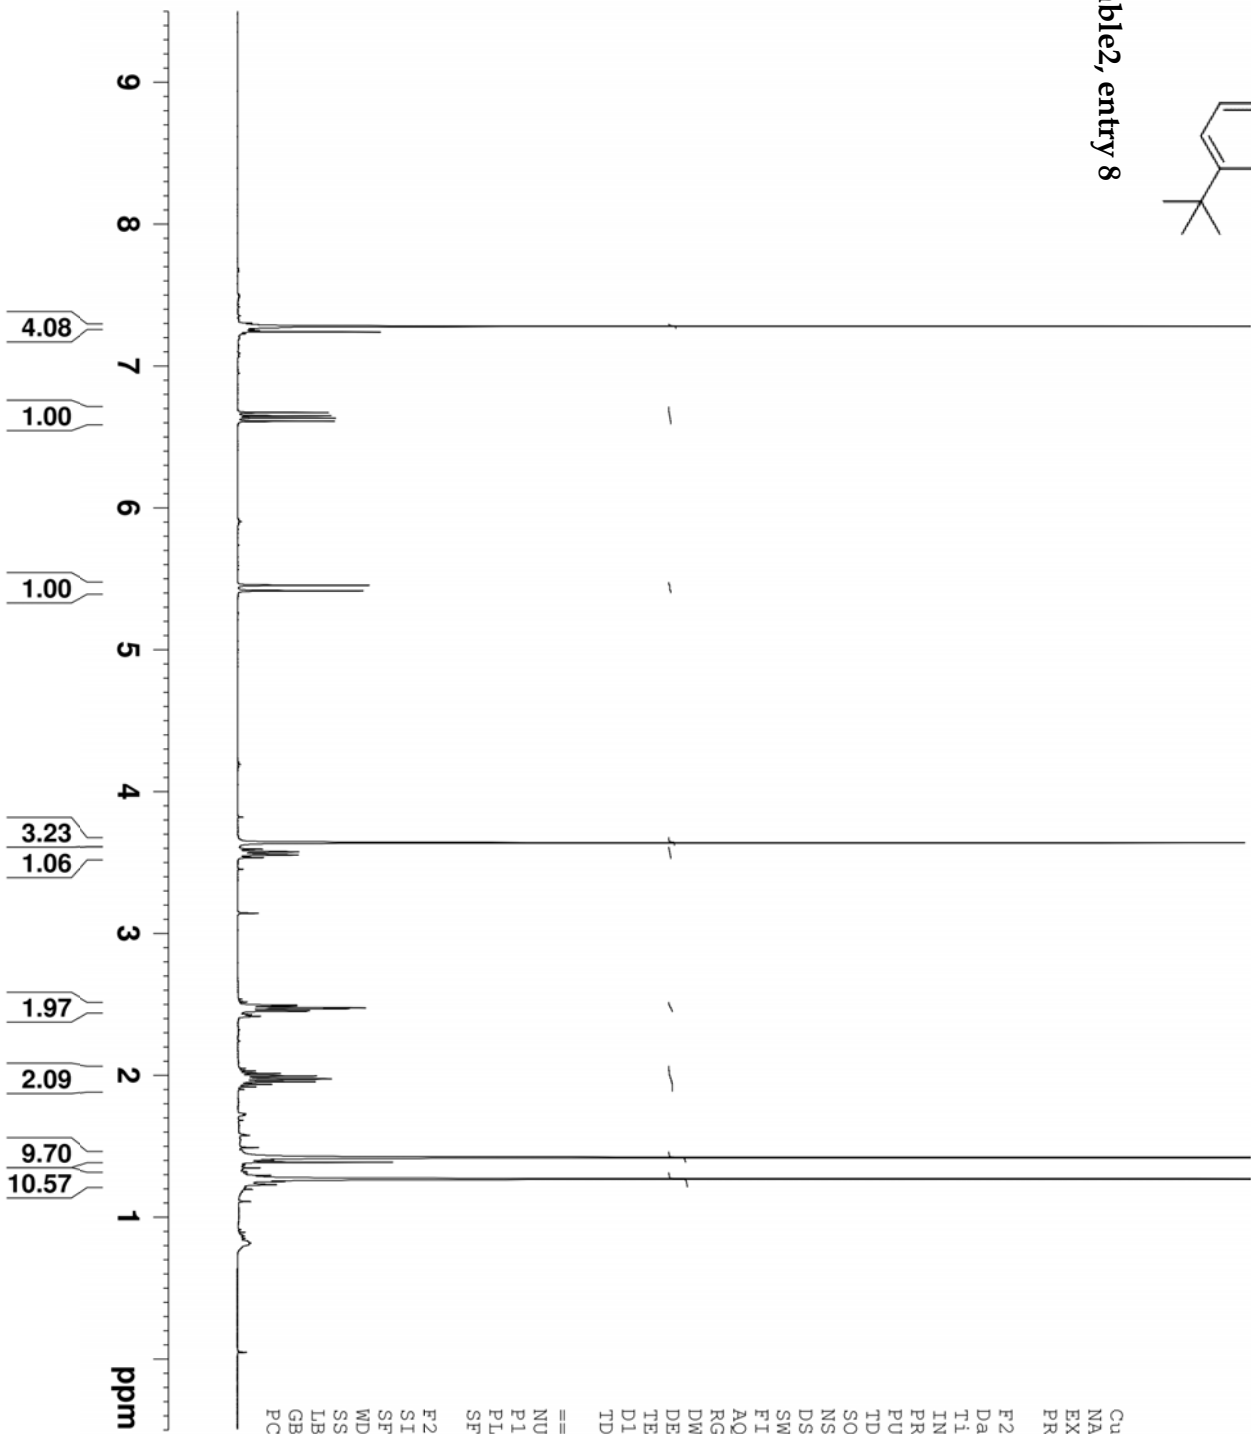

Current Data Parameters  
 NAME YF0407-2B  
 EXPNO 1  
 PROCNO 1

F2 - Acquisition Parameters  
 Date\_ 20100420  
 Time 13.45  
 INSTRUM spect  
 PROBHD 5 mm BBO BB-1H  
 PULPROG zg30  
 TD 65536  
 SOLVENT  
 NS 16  
 DS 2  
 SWH 8278.146 Hz  
 FIDRES 0.126314 Hz  
 AQ 3.9584243 sec  
 RG 35.9  
 DW 60.400 usec  
 DE 6.00 usec  
 TE 296.2 K  
 D1 1.00000000 sec  
 TD0 1

==== CHANNEL f1 =====  
 NUC1 1H  
 P1 15.07 usec  
 PL1 0.00 dB  
 SFO1 400.1324710 MHz  
 F2 - Processing parameters  
 SI 65536  
 SF 400.1300167 MHz  
 WDW no  
 SSB 0  
 LB 0.00 Hz  
 GB 0  
 PC 1.00

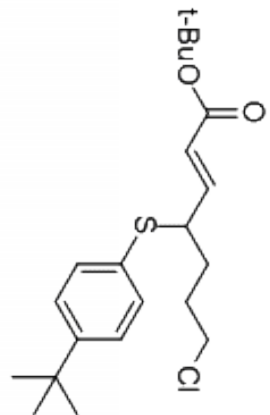

Table2, entry 9

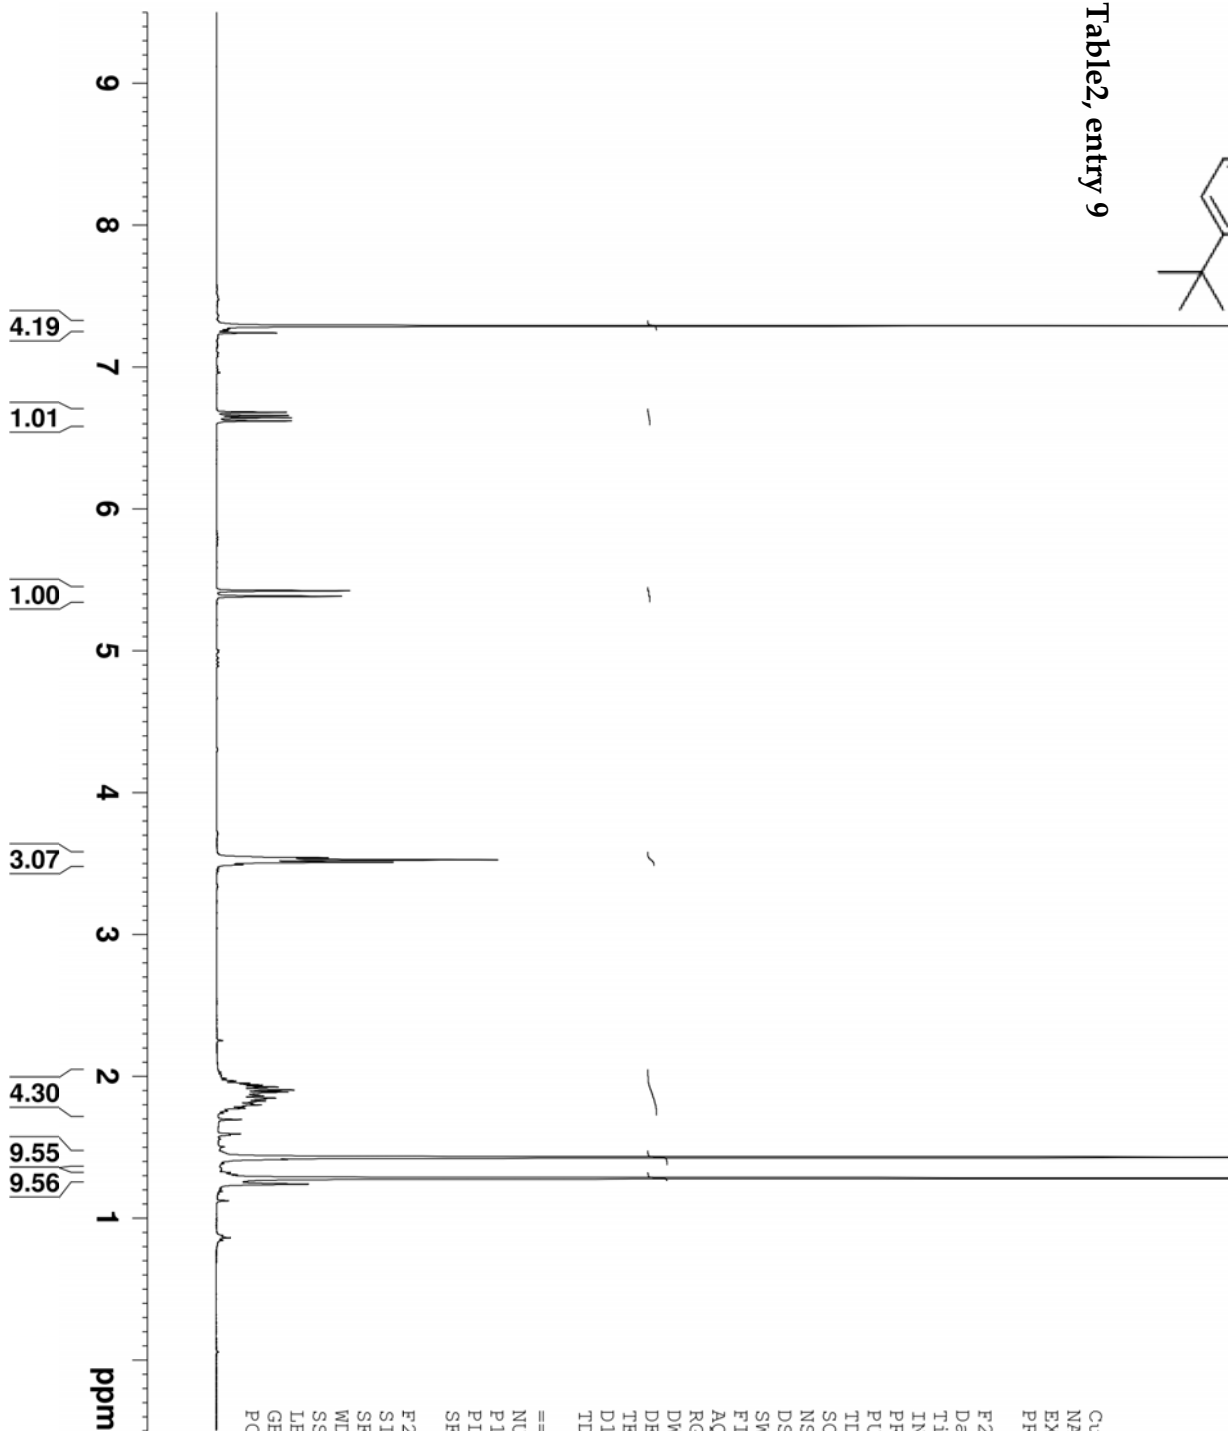

Current Data Parameters  
 NAME YF0374-1C  
 EXPNO 3  
 PROCNO 1

F2 - Acquisition Parameters

Date\_ 20100325

Time 12.43

INSTRUM spect

PROBHD 5 mm BBO BB-1H

PULPROG zg30

TD 65536

SOLVENT

NS 16

DS 2

SWH 8278.146 Hz

FIDRES 0.126314 Hz

AQ 3.9584243 sec

RG 35.9

DW 60.400 usec

DE 6.00 usec

TE 295.2 K

D1 1.00000000 sec

TD0 1

===== CHANNEL f1 =====

NUC1 1H

P1 15.07 usec

PL1 0.00 dB

SFO1 400.1324710 MHz

F2 - Processing Parameters

SI 65536

SF 400.1300170 MHz

WDW no

SSB 0

LB 0.00 Hz

GB 0

PC 1.00

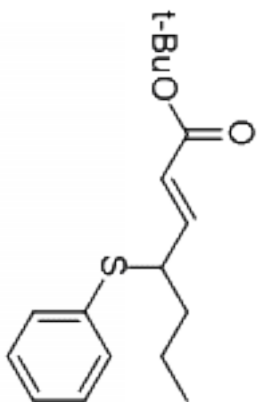

Table 3, entry 1

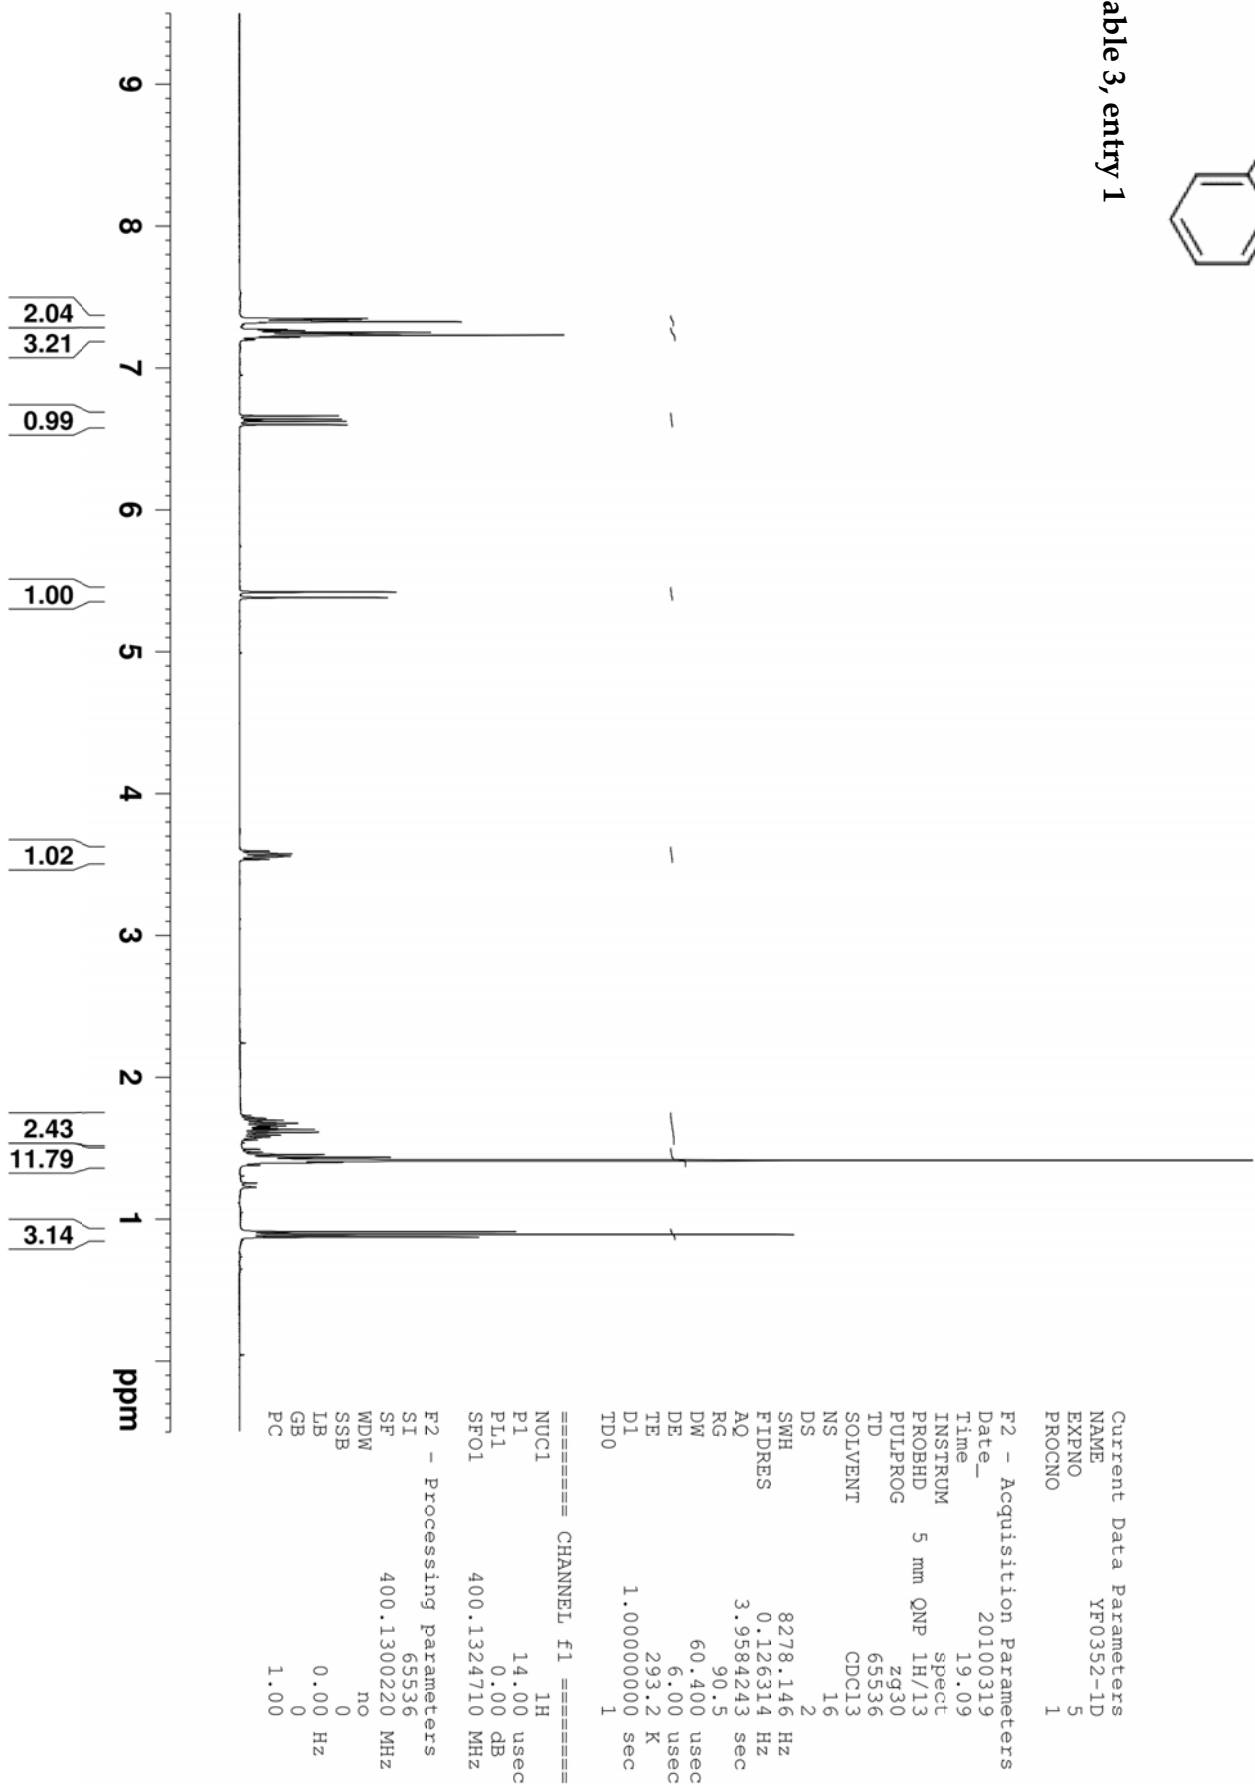

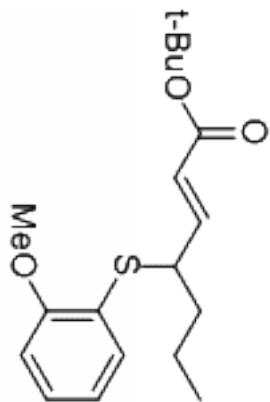

Table 3, entry 2

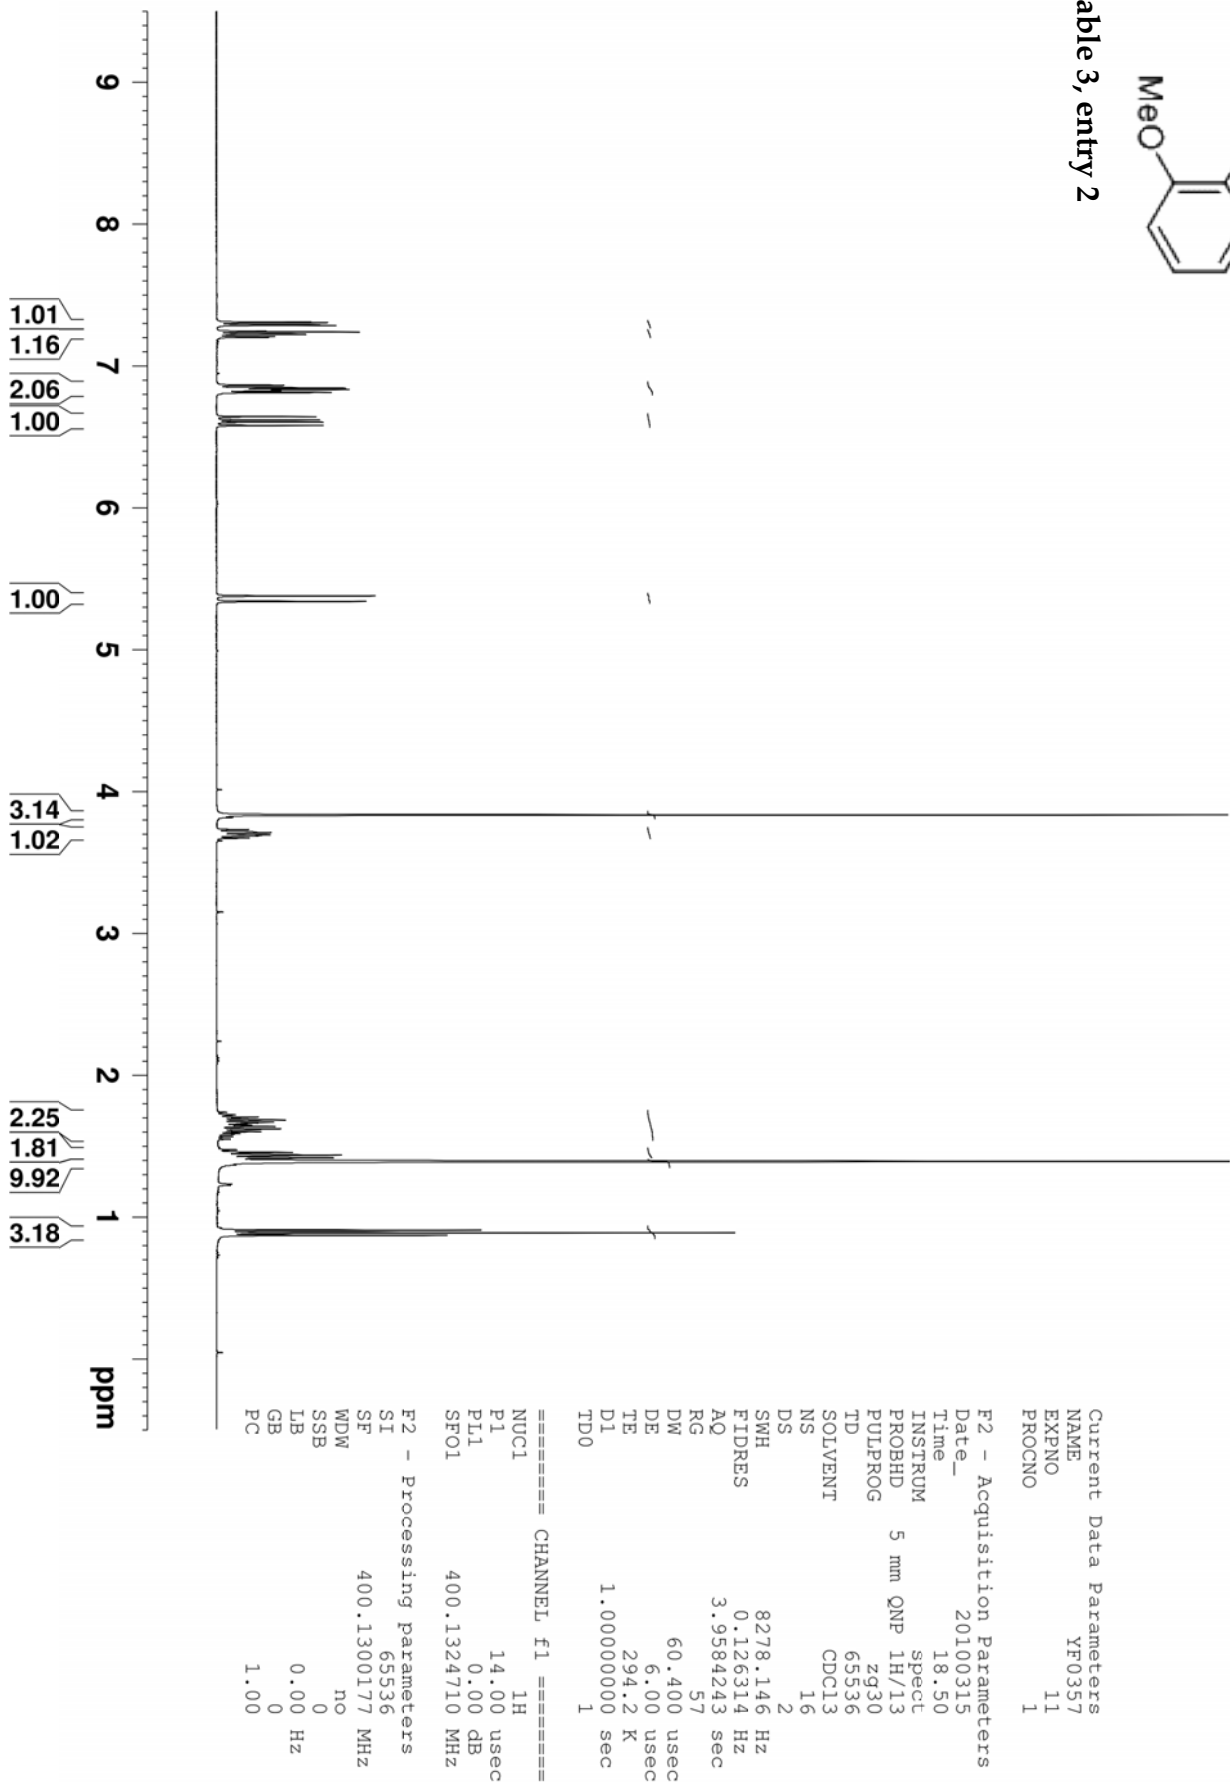

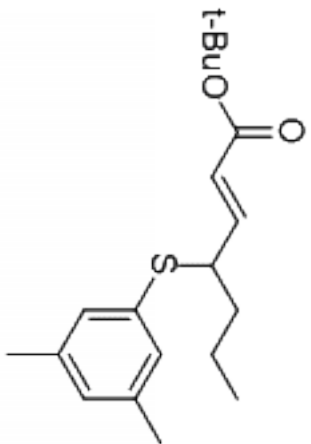

Table 3, entry 3

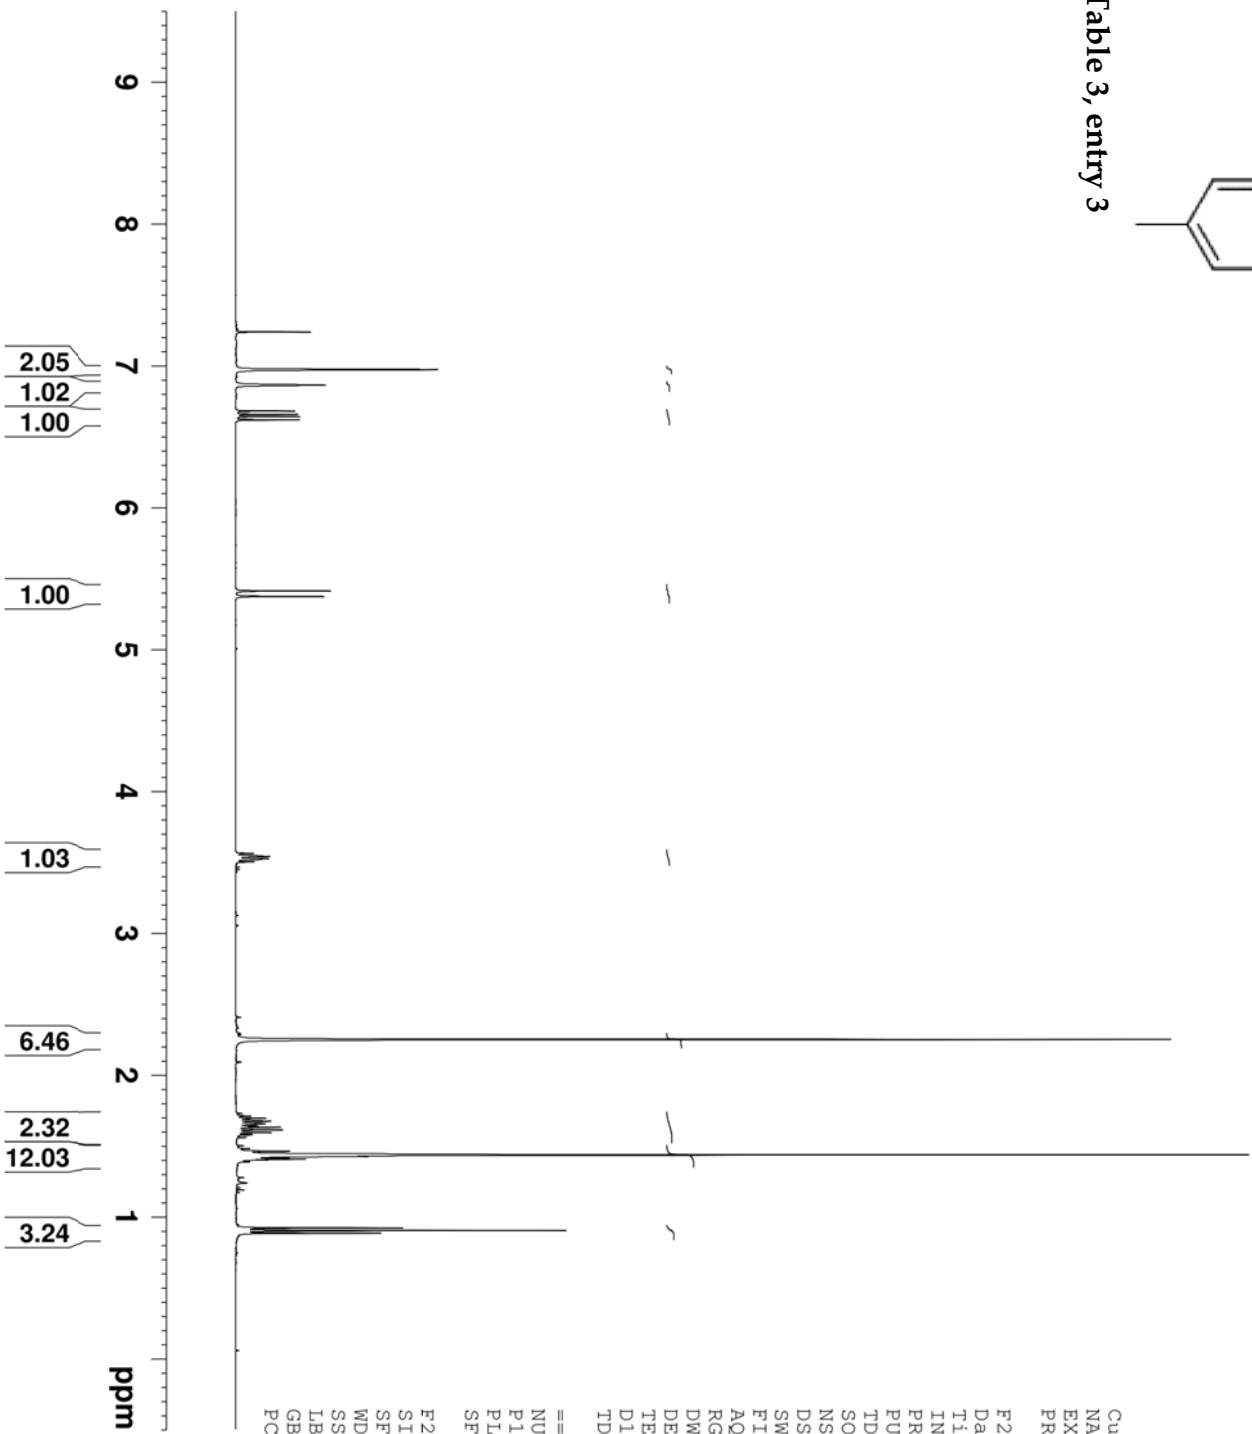

Current Data Parameters  
 NAME YF0351-2B  
 EXPNO 2  
 PROCNO 1

F2 - Acquisition Parameters  
 Date\_ 20100318  
 Time 18.05  
 INSTRUM spect  
 PROBHD 5 mm QNP 1H/13  
 PULPROG zg30  
 TD 65536  
 SOLVENT CDCl3  
 NS 16  
 DS 2  
 SWH 8278.146 Hz  
 FIDRES 0.126314 Hz  
 AQ 3.9584243 sec  
 RG 57  
 DW 60.400 usec  
 DE 6.00 usec  
 TE 294.2 K  
 D1 1.00000000 sec  
 TD0 1

==== CHANNEL f1 =====  
 NUC1 1H  
 P1 14.00 usec  
 PL1 0.00 dB  
 SFO1 400.1324710 MHz  
 F2 - Processing parameters  
 SI 65536  
 SF 400.1300178 MHz  
 WDW no  
 SSB 0  
 LB 0.00 Hz  
 GB 0  
 PC 1.00

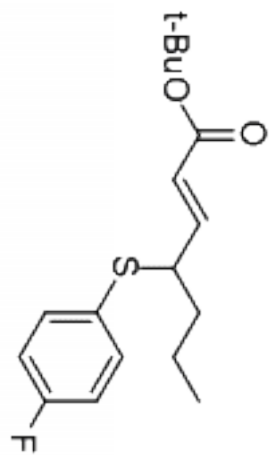

Table 3, entry 4

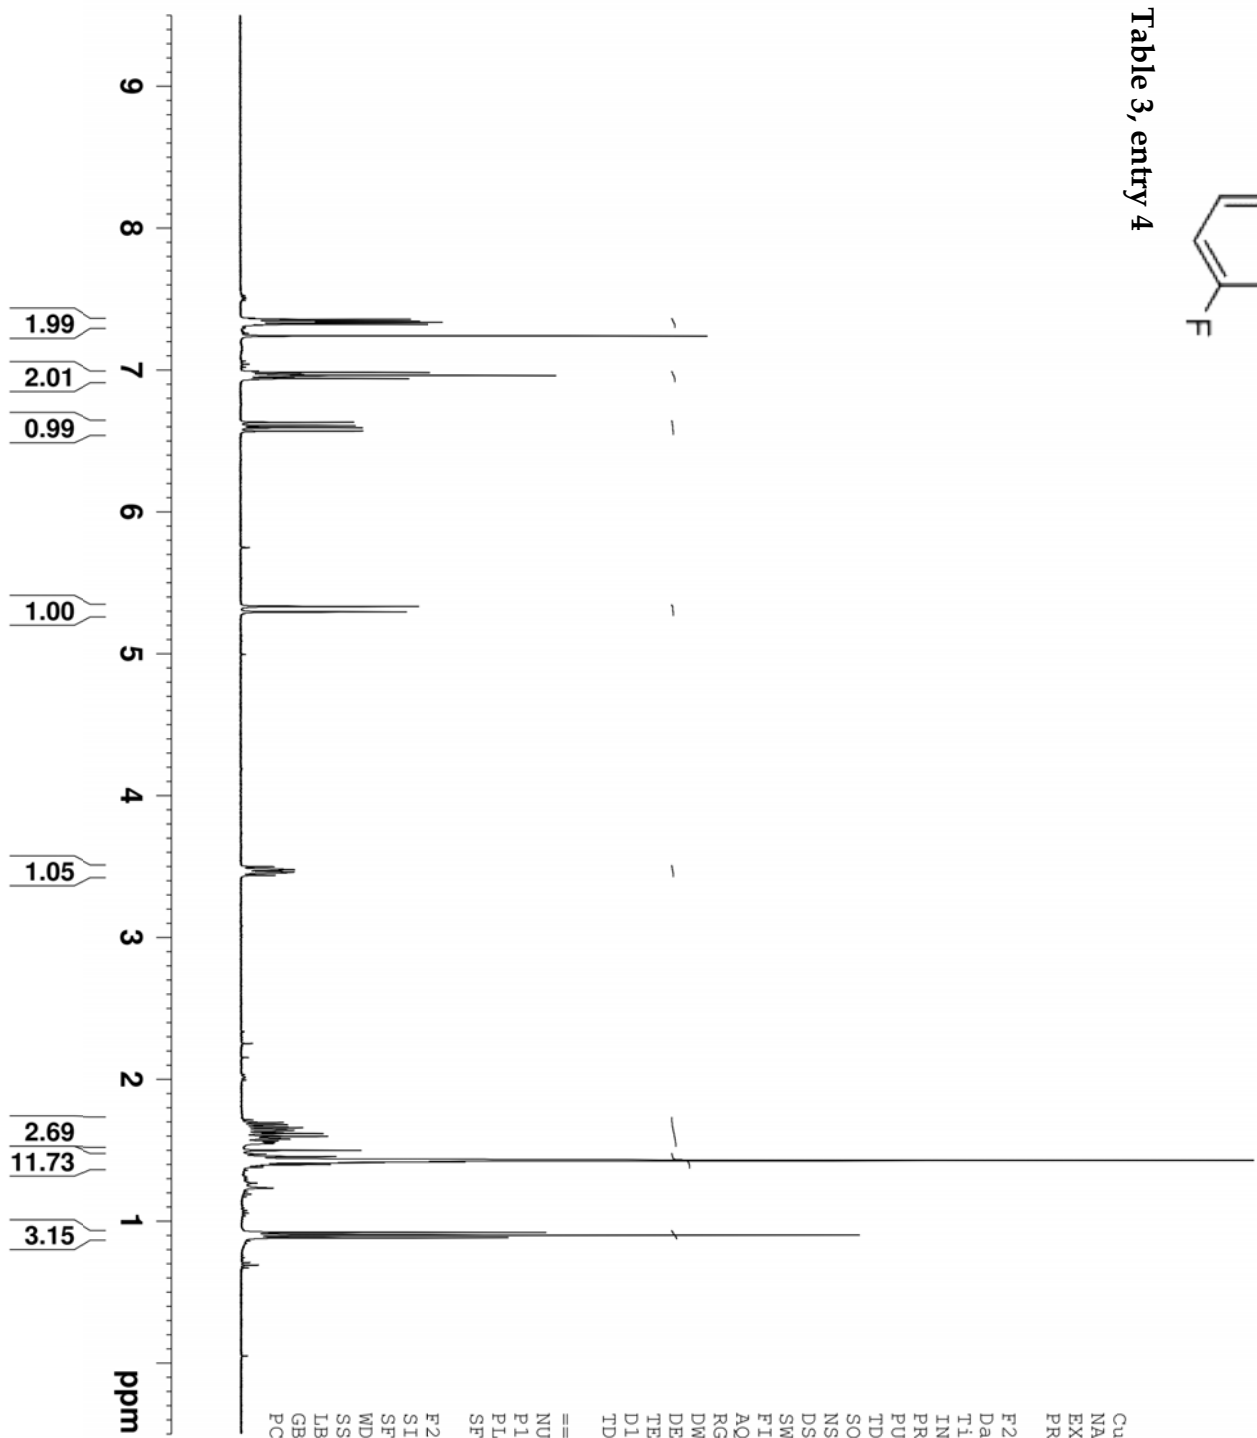

Current Data Parameters  
 NAME YF0355-2B  
 EXPNO 1  
 PROCNO 1

F2 - Acquisition Parameters  
 Date\_ 20100317  
 Time 21.20

INSTRUM spect  
 PROBHD 5 mm QNP 1H/13  
 PULPROG zg30  
 TD 65536  
 SOLVENT CDCl3  
 NS 16  
 DS 2

SWH 8278.146 Hz  
 FIDRES 0.126314 Hz  
 AQ 3.9584243 sec  
 RG 256  
 DW 60.400 usec  
 DE 6.00 usec  
 TE 294.2 K

D1 1.00000000 sec  
 TD0 1

==== CHANNEL f1 =====  
 NUC1 1H  
 P1 14.00 usec  
 PL1 0.00 dB  
 SFO1 400.1324710 MHz

F2 - Processing parameters  
 SI 65536  
 SF 400.1300177 MHz  
 WDW no  
 SSB 0  
 LB 0.00 Hz  
 GB 0  
 PC 1.00

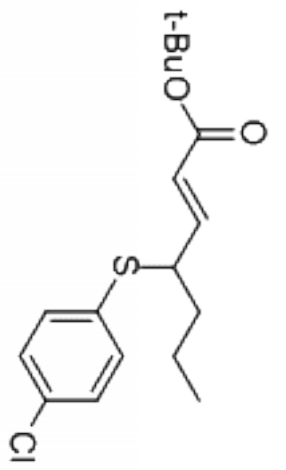

Table 3, entry 5

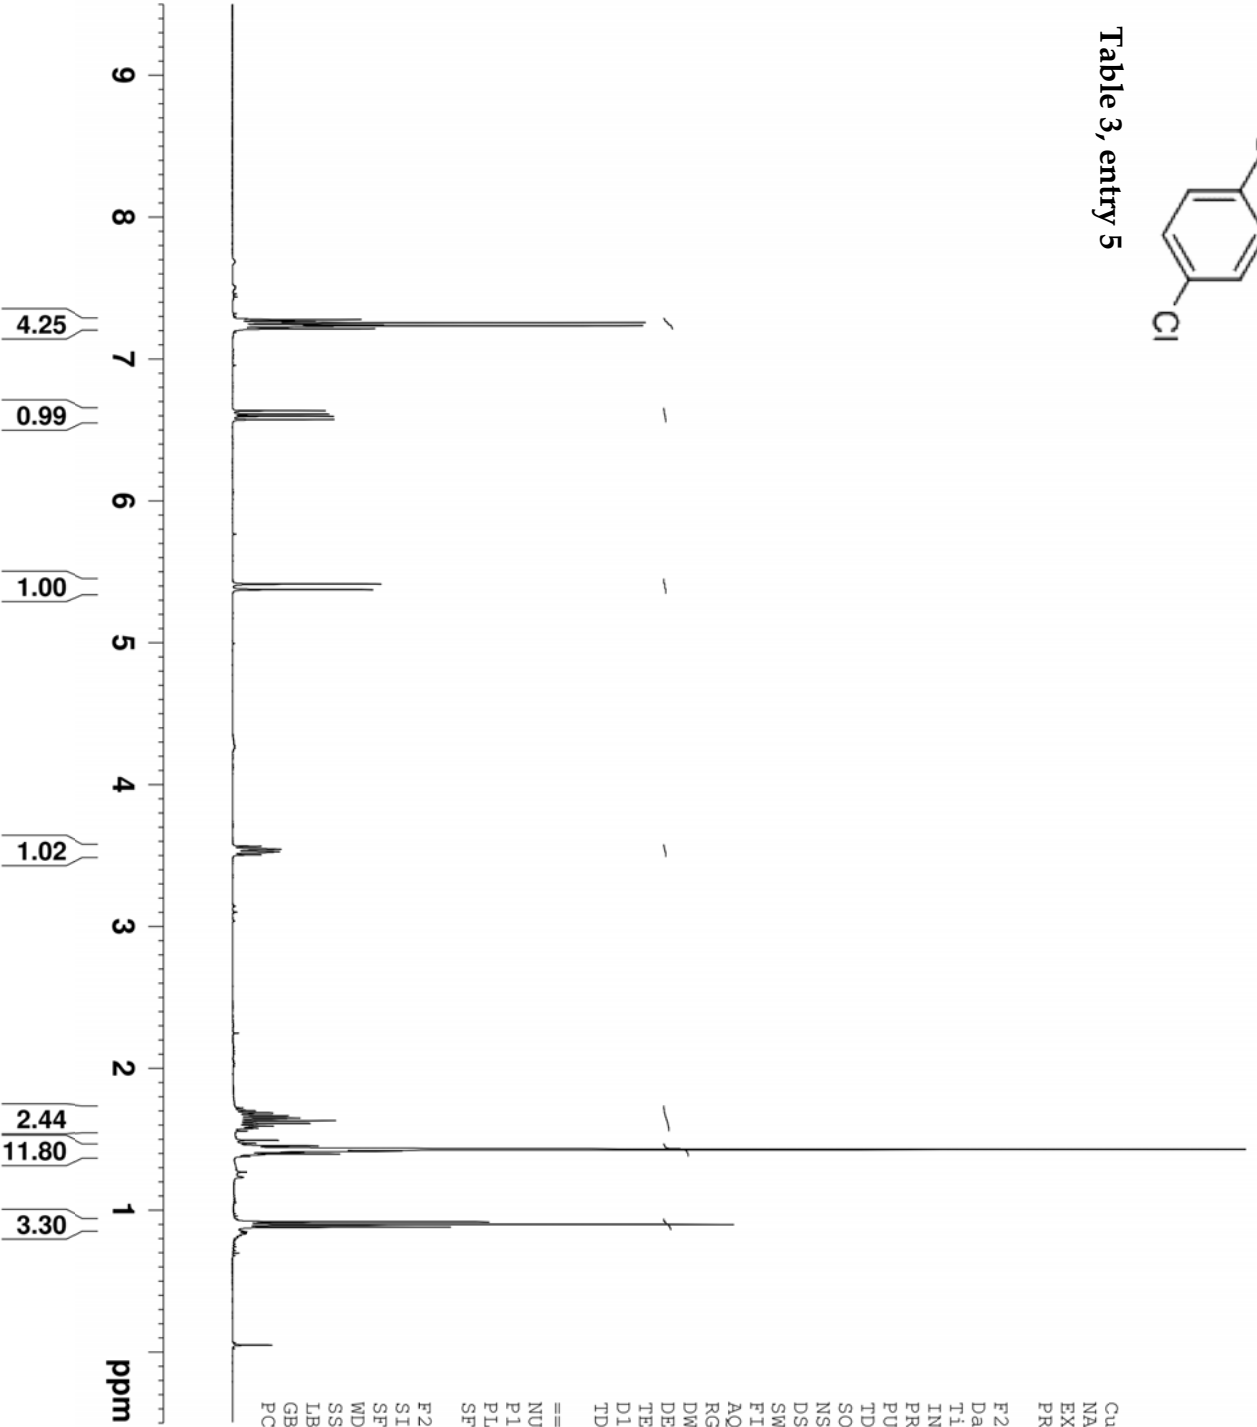

Current Data Parameters  
 NAME YF0358-1B  
 EXPNO 1  
 PROCNO 1

F2 - Acquisition Parameters  
 Date\_ 20100316  
 Time 19.40

INSTRUM spect  
 PROBHD 5 mm QNP 1H/13  
 PULPROG zg30  
 TD 65536  
 SOLVENT CDCl3  
 NS 16  
 DS 2

SWH 8278.146 Hz  
 FIDRES 0.126314 Hz  
 AQ 3.9584243 sec  
 RG 101.6  
 DW 60.400 usec  
 DE 6.00 usec  
 TE 294.2 K  
 D1 1.00000000 sec  
 TD0 1

==== CHANNEL f1 =====  
 NUC1 1H  
 P1 14.00 usec  
 PL1 0.00 dB  
 SFO1 400.1324710 MHz

F2 - Processing parameters  
 SI 65536  
 SF 400.1300178 MHz  
 WDW no  
 SSB 0  
 LB 0.00 Hz  
 GB 0  
 PC 1.00

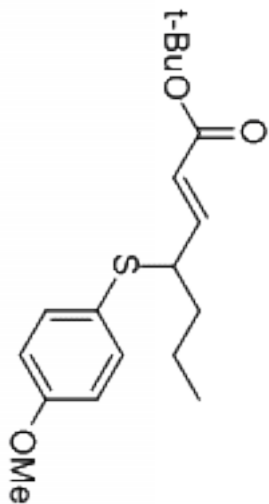

Table 3, entry 6

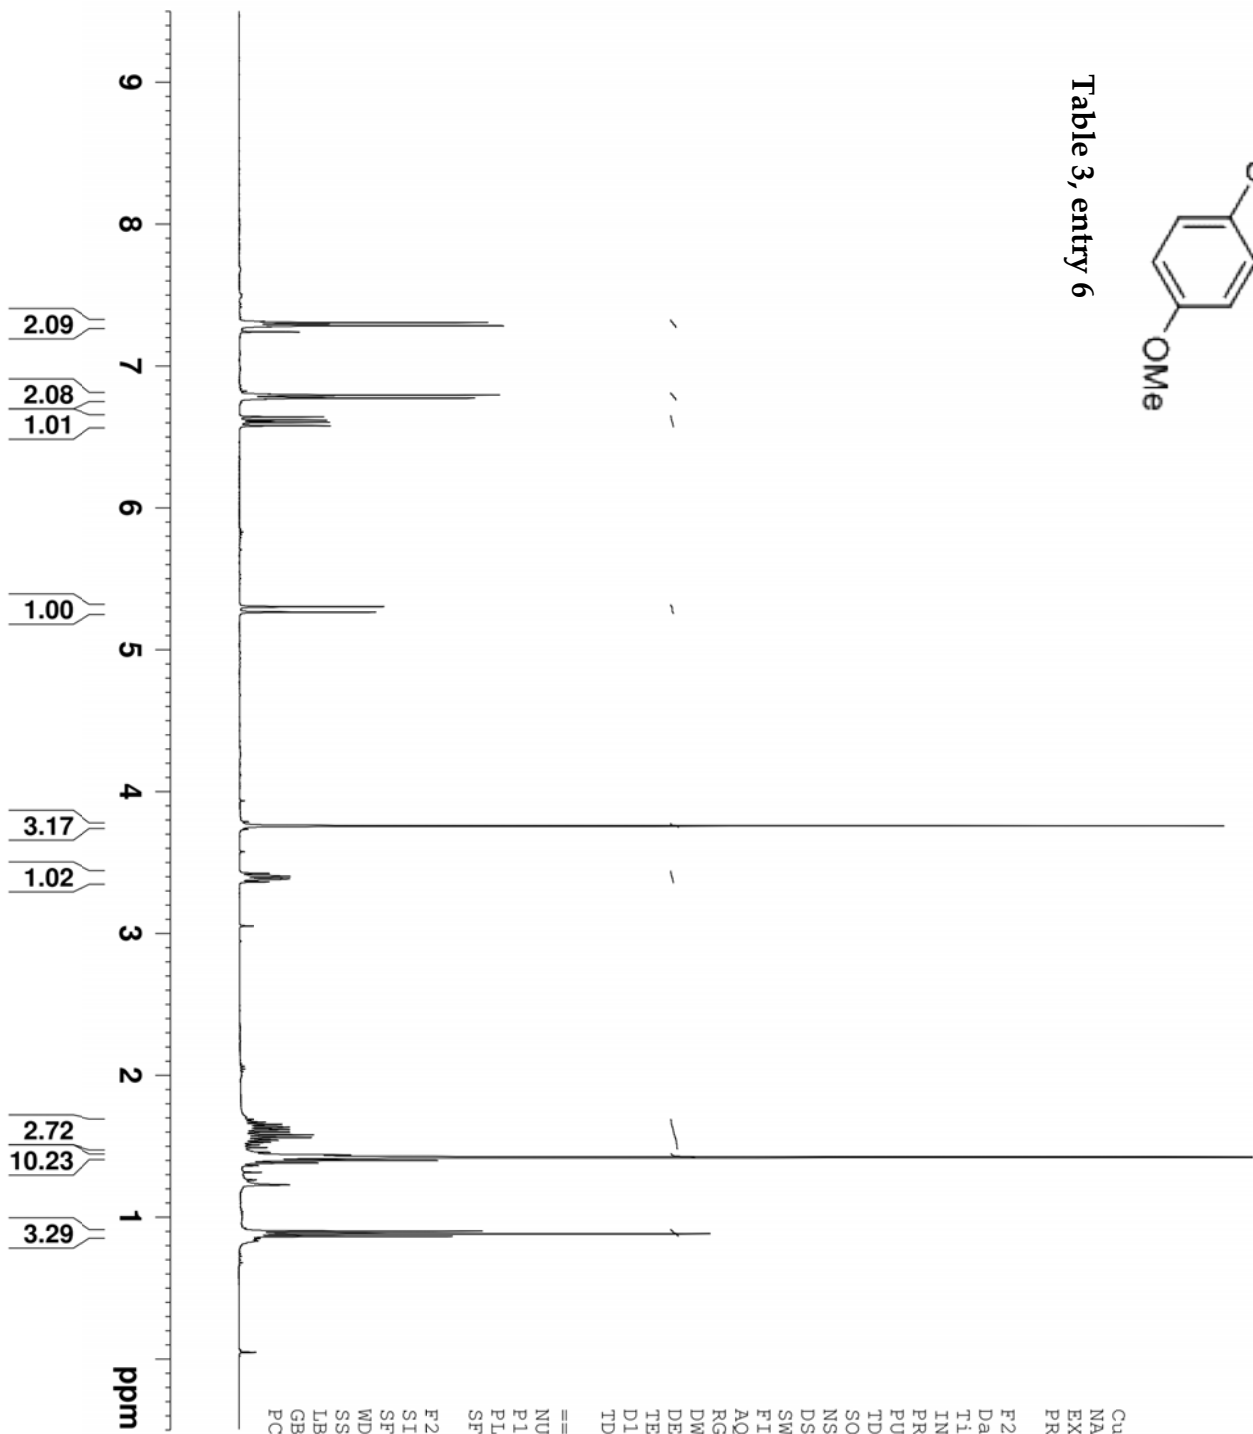

Current Data Parameters  
 NAME YF0356  
 EXPNO 2  
 PROCNO 1

F2 - Acquisition Parameters  
 Date\_ 20100315  
 Time 18.39

INSTRUM spect  
 PROBHD 5 mm QNP 1H/13  
 PULPROG zg30  
 TD 65536  
 SOLVENT CDCl<sub>3</sub>

DS 2  
 SWH 8278.146 Hz  
 FIDRES 0.126314 Hz  
 AQ 3.9584243 sec

RG 57  
 DW 60.400 usec  
 DE 6.00 usec  
 TE 294.2 K  
 D1 1.00000000 sec  
 TD0 1

==== CHANNEL f1 =====  
 NUC1 1H  
 P1 14.00 usec  
 PL1 0.00 dB  
 SFO1 400.1324710 MHz

F2 - Processing parameters  
 SI 65536  
 SF 400.1300176 MHz  
 WDW no  
 SSB 0  
 LB 0.00 Hz  
 GB 0  
 PC 1.00



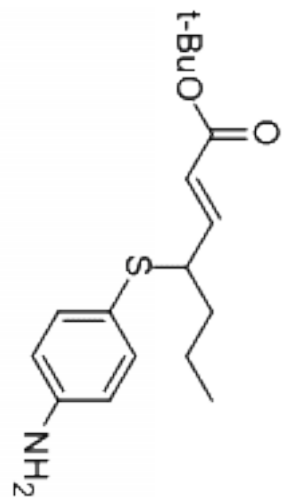

Table 3, entry 7

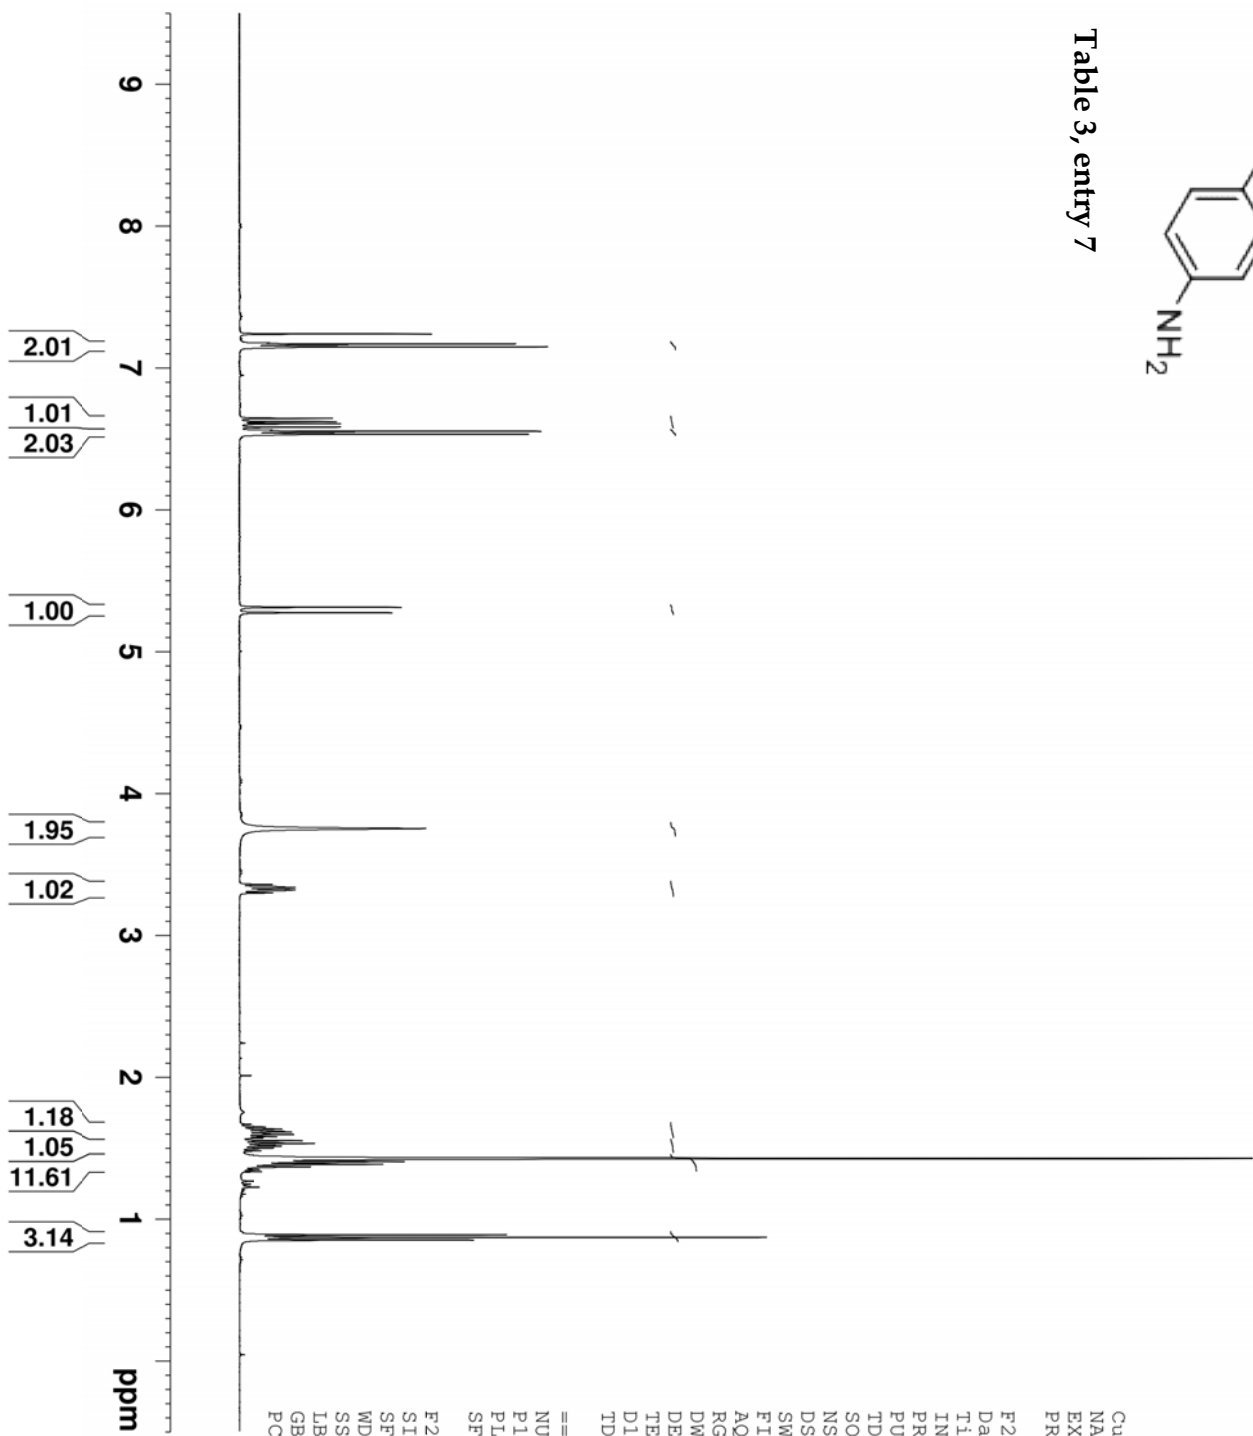

Current Data Parameters  
 NAME YF0428-1B  
 EXPNO 1  
 PROCNO 1

F2 - Acquisition Parameters  
 Date\_ 20100430  
 Time 10.35  
 INSTRUM spect  
 PROBHD 5 mm QNP 1H/13  
 PULPROG zg30  
 TD 65536  
 SOLVENT CDCl3  
 NS 4  
 DS 2  
 SWH 8278.146 Hz  
 FIDRES 0.126314 Hz  
 AQ 3.9584243 sec  
 RG 57  
 DW 60.400 usec  
 DE 6.00 usec  
 TE 294.2 K  
 D1 1.00000000 sec  
 TD0 1

==== CHANNEL f1 =====  
 NUC1 1H  
 P1 14.00 usec  
 PL1 0.00 dB  
 SFO1 400.1324710 MHz  
 F2 - Processing parameters  
 SI 65536  
 SF 400.1300179 MHz  
 WDW no  
 SSB 0  
 LB 0.00 Hz  
 GB 0  
 PC 1.00
